# Supplementary material for: Population-specific and transethnic genome-wide analyses reveal distinct and shared genetic risks of coronary artery disease
Source: bioRxiv or medRxiv preprint supplement (doi:10.1101/827550), 2019-11-16
Supplement: Supplementary file [file media-3.pdf]

# **Supplementary Data Set**

- 1. Newly identified 9 loci in Japanese GWAS**
- 2. Previously reported 39 loci in Japanese GWAS**
- 3. Newly identified 43 loci in Meta analysis**
- 4. Previously reported 133 loci in Meta analysis**

# 1. Newly identified 9 loci in Japanese GWAS

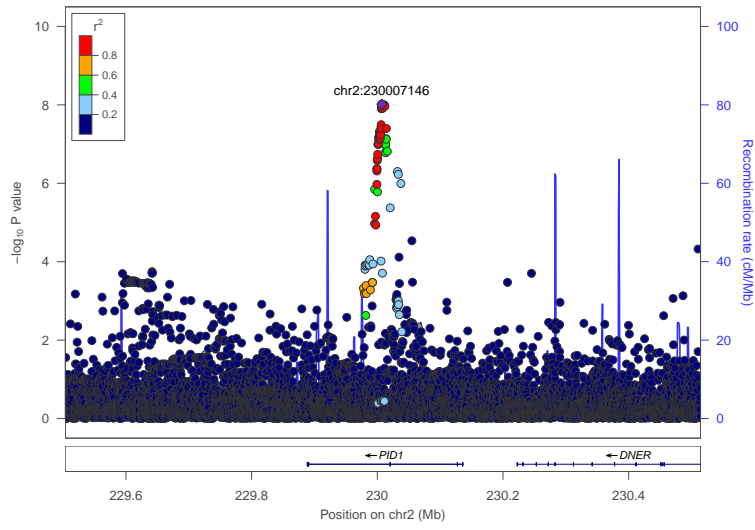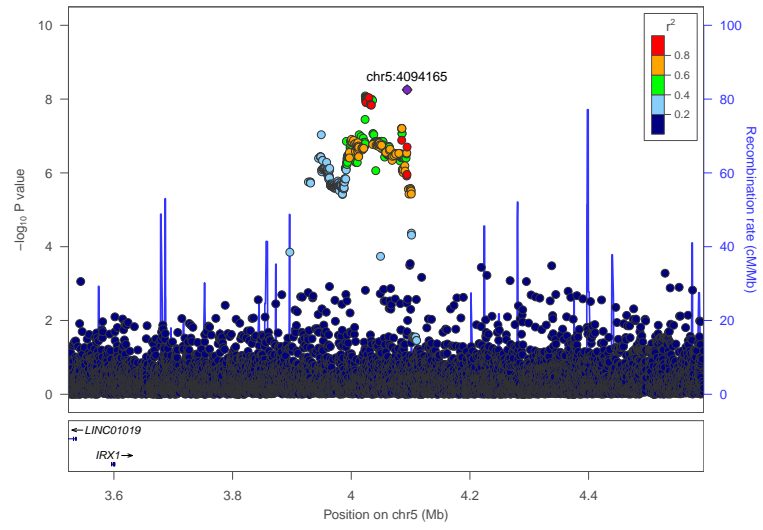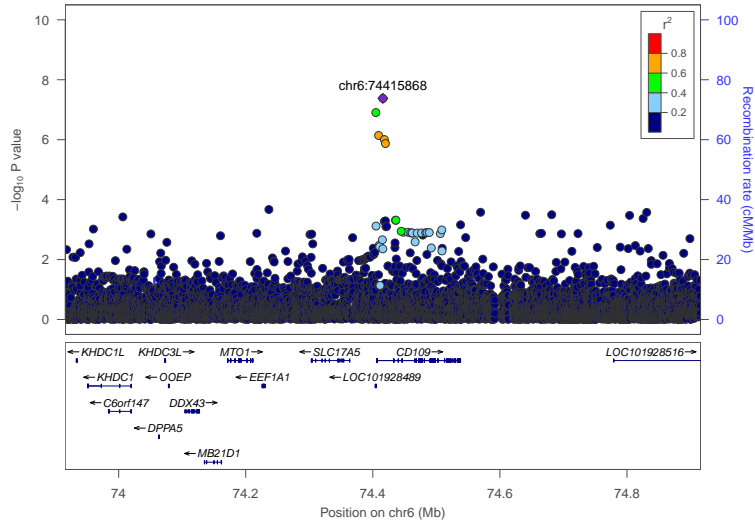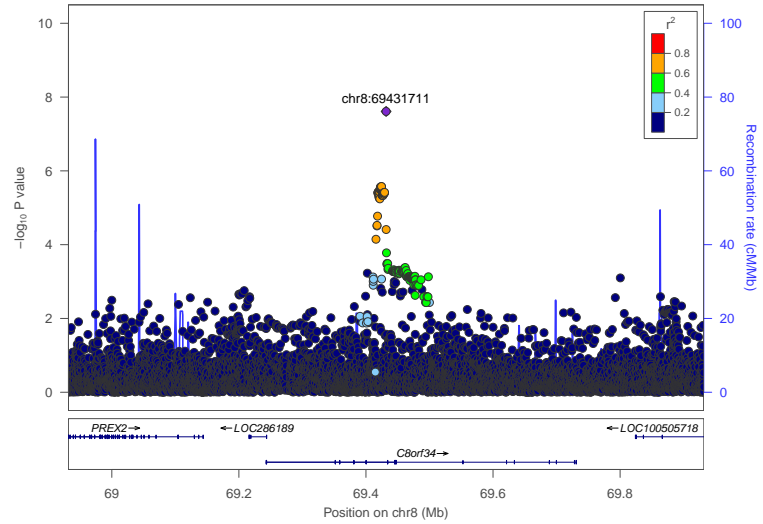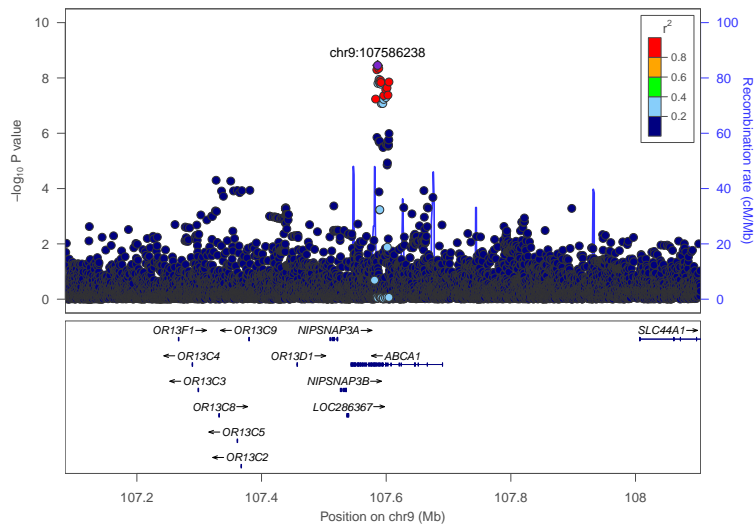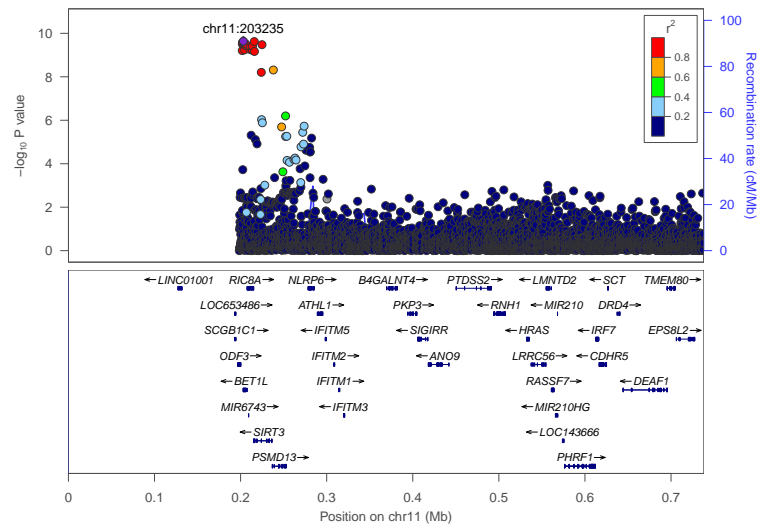

# 1. Newly identified 9 loci in Japanese GWAS

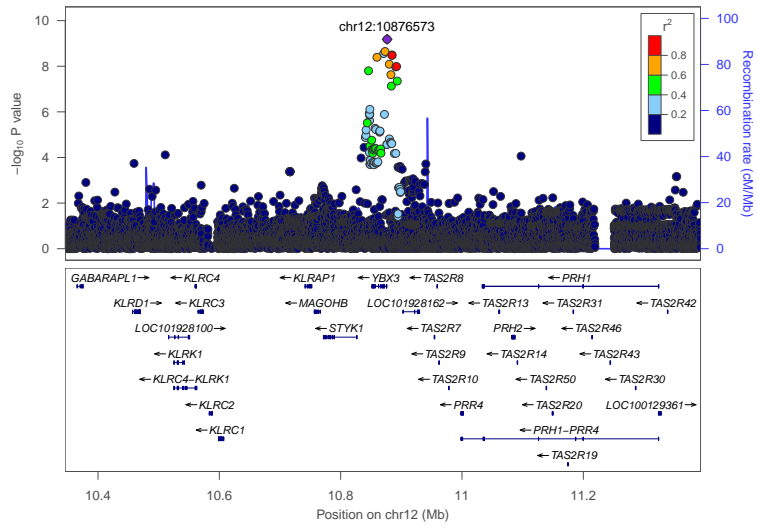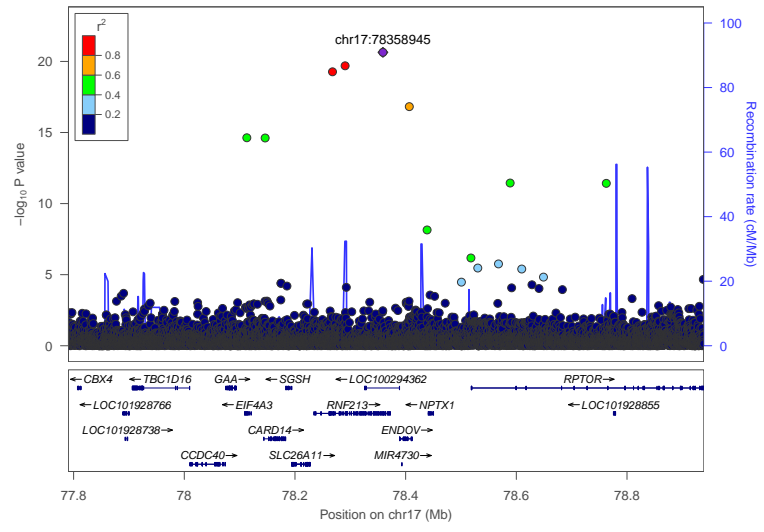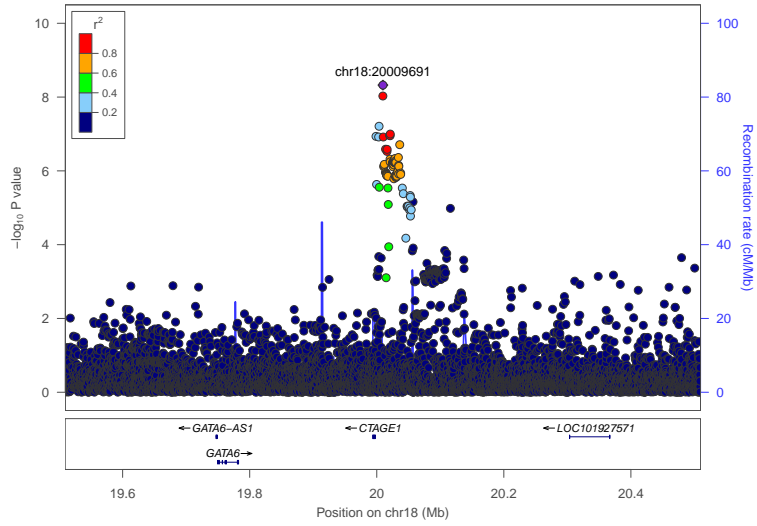

## 2. Previously reported 39 loci in Japanese GWAS

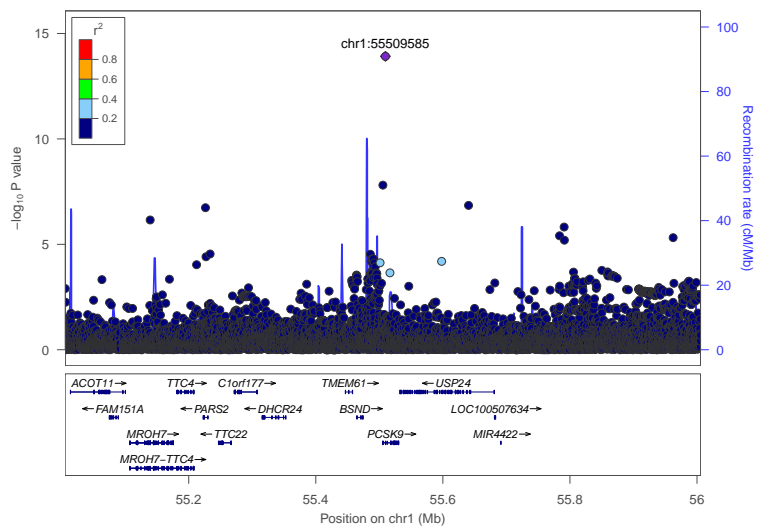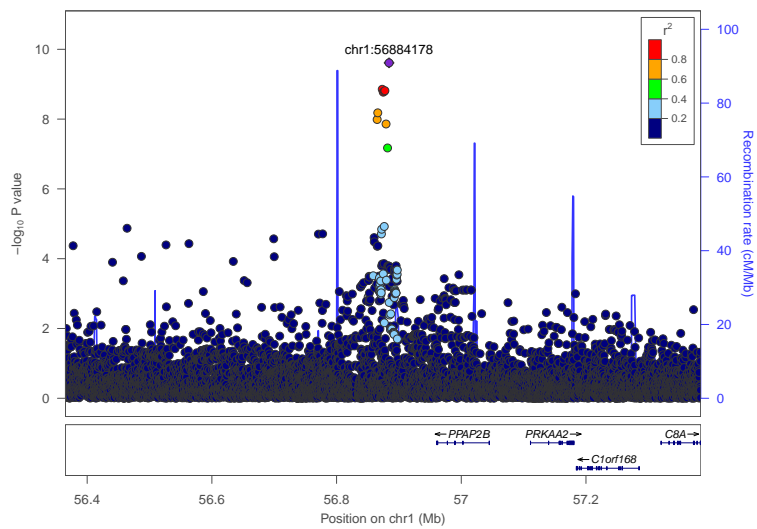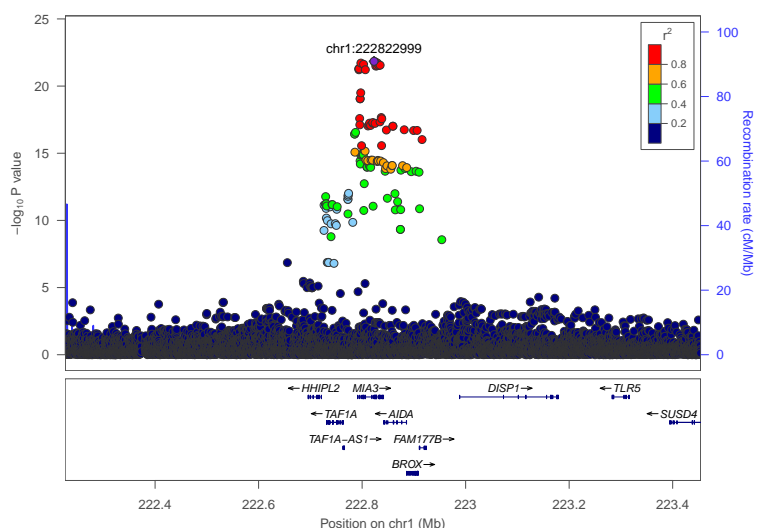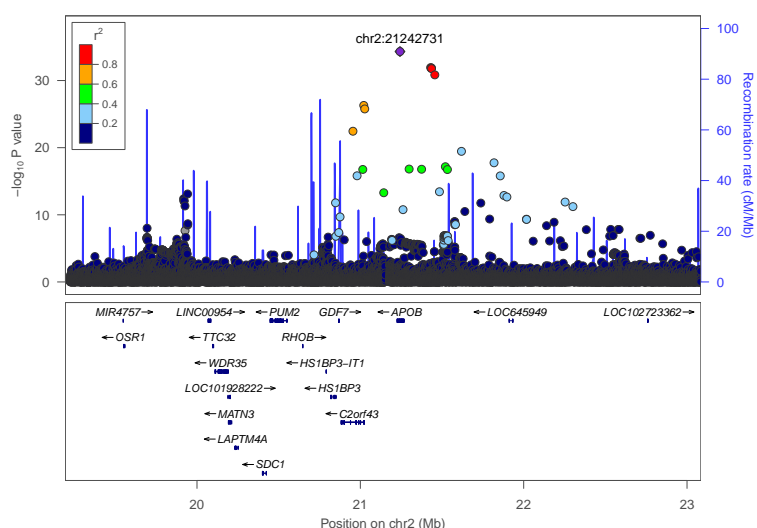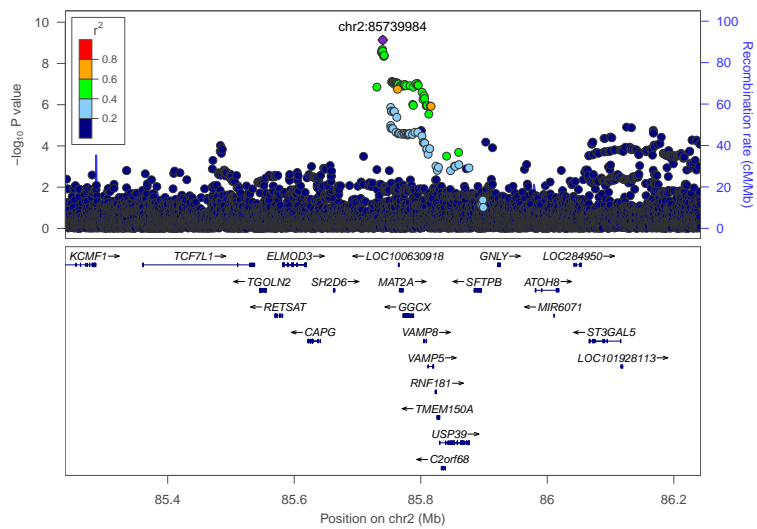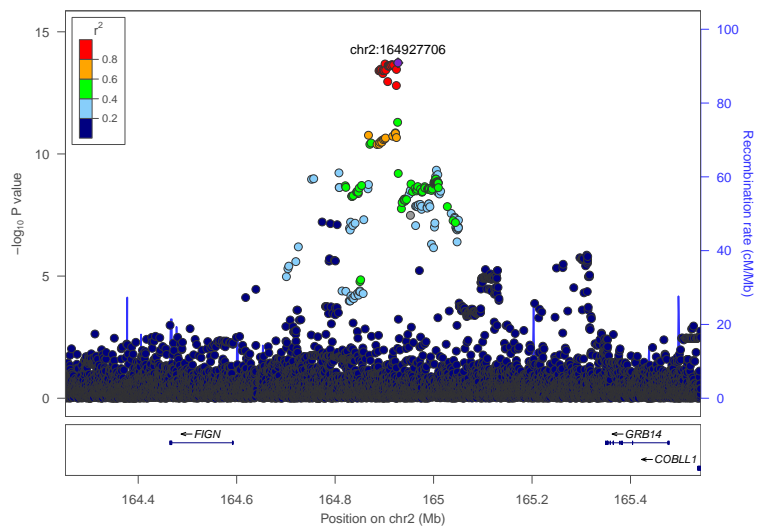



## 2. Previously reported 39 loci in Japanese GWAS

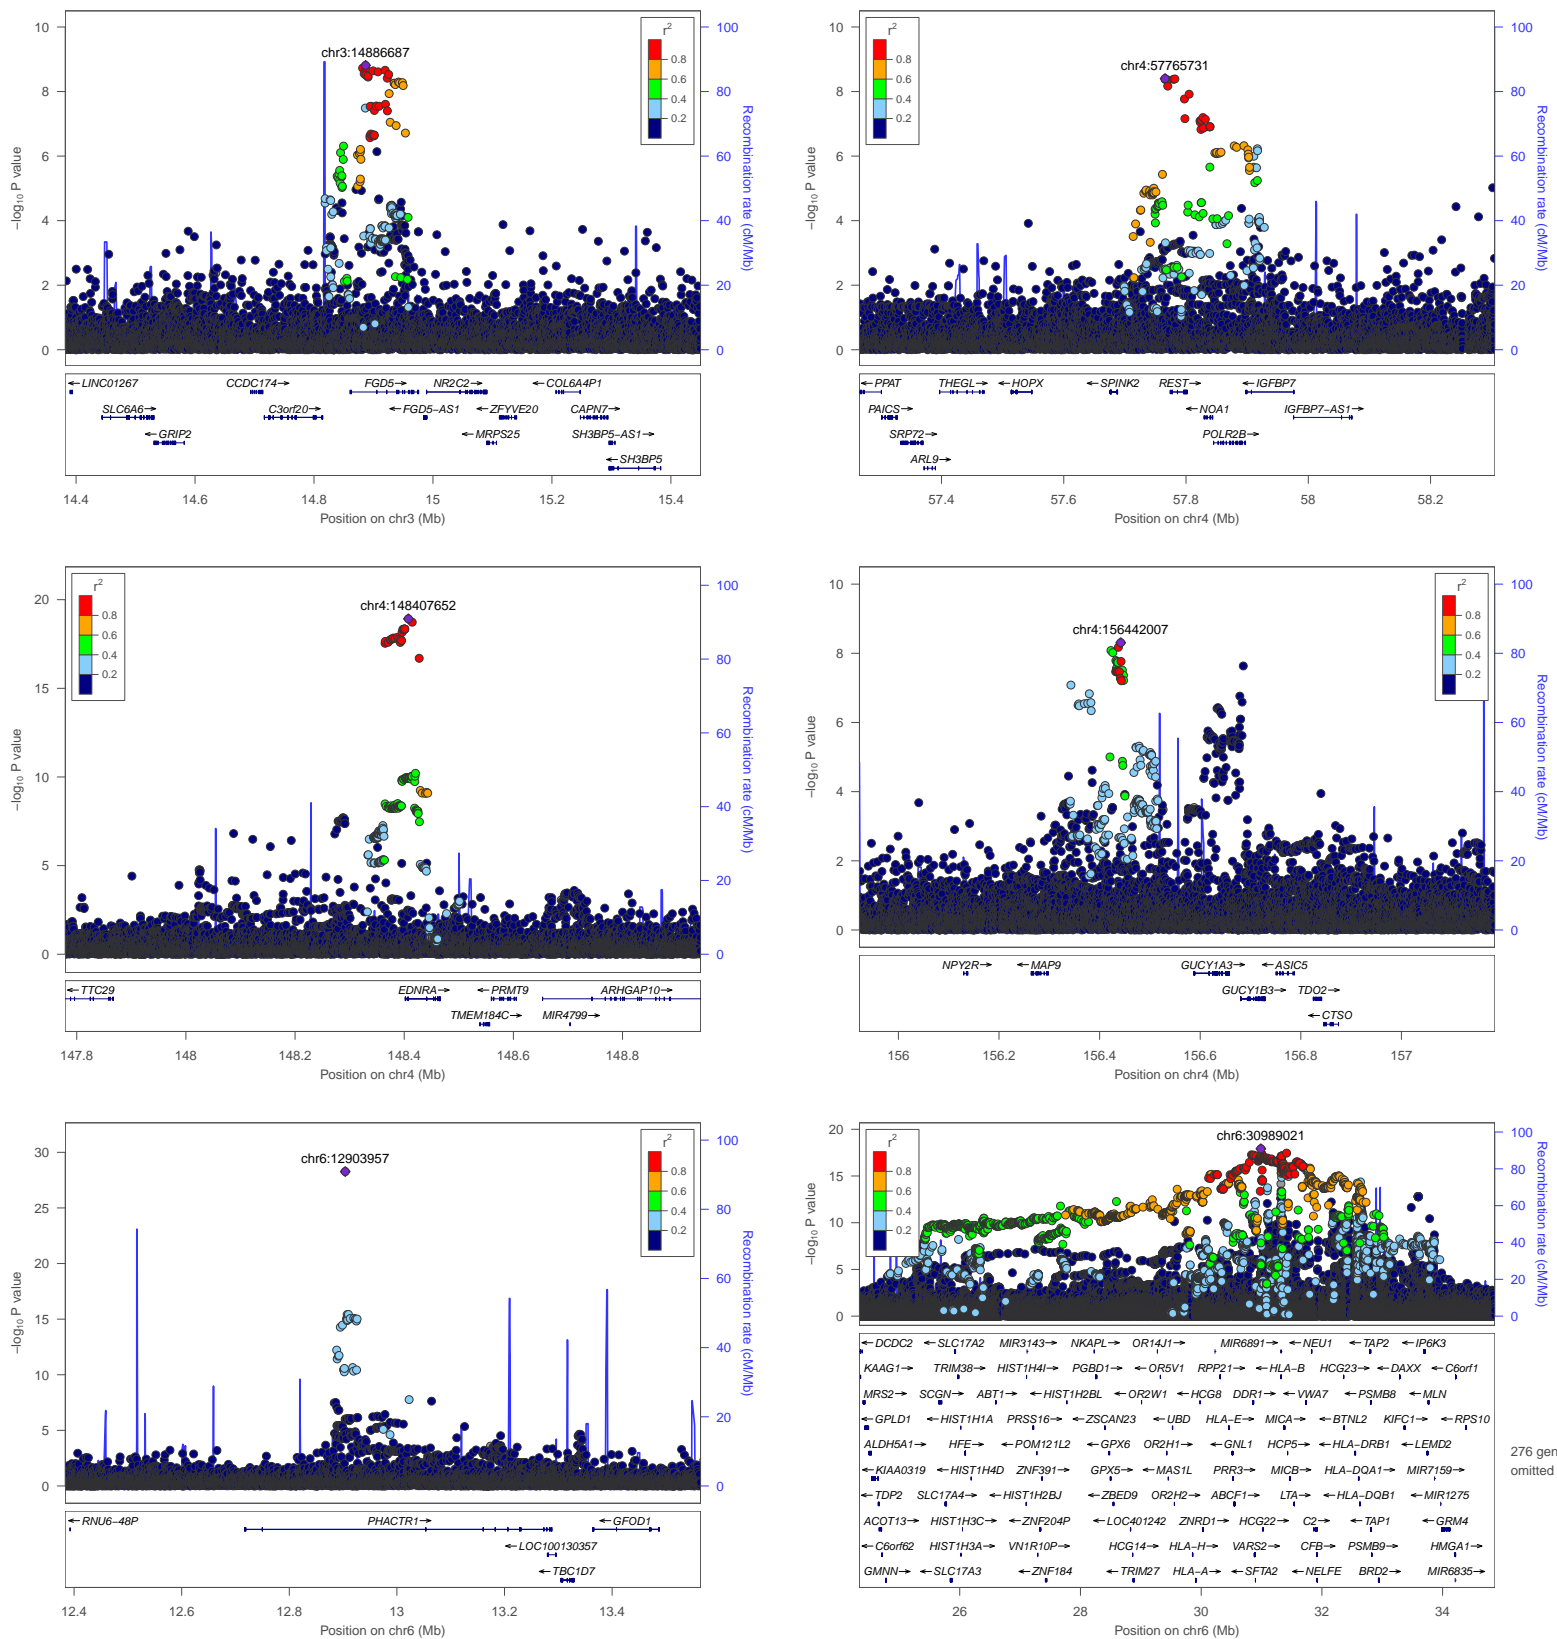

## 2. Previously reported 39 loci in Japanese GWAS

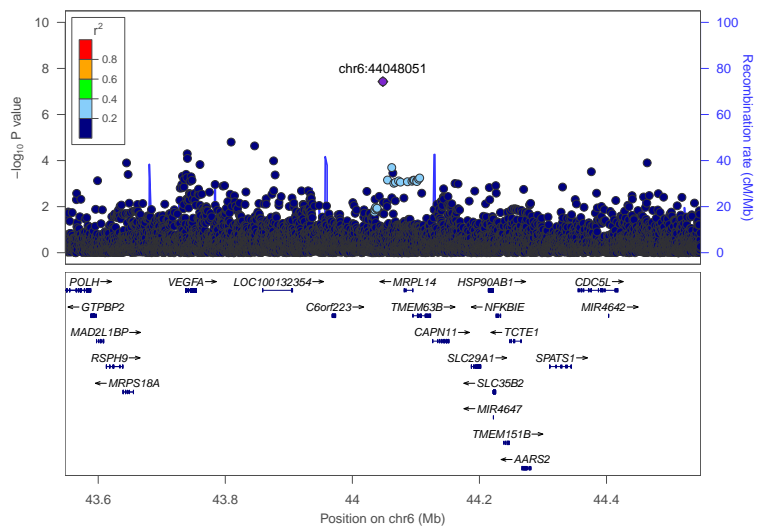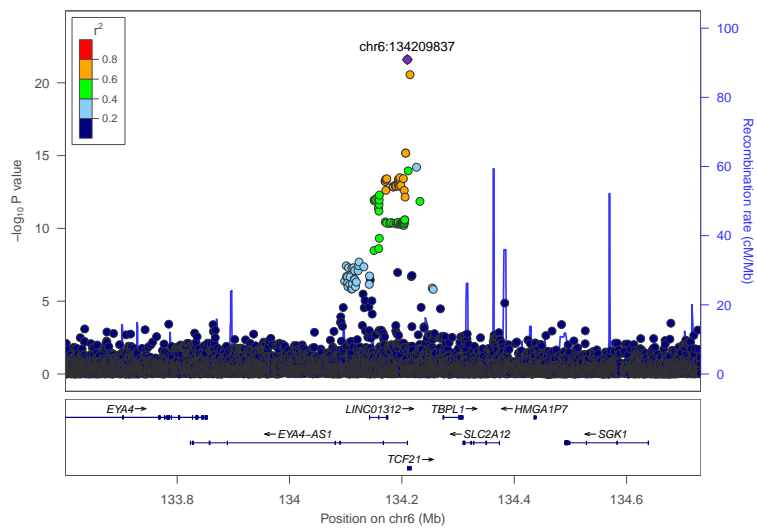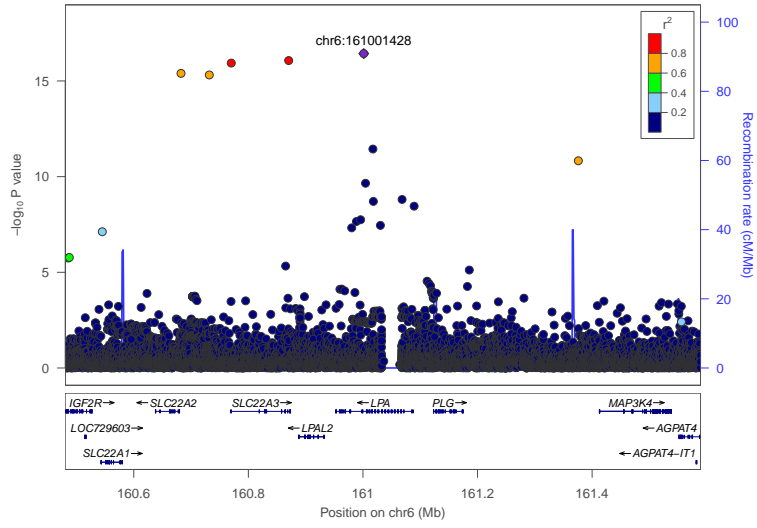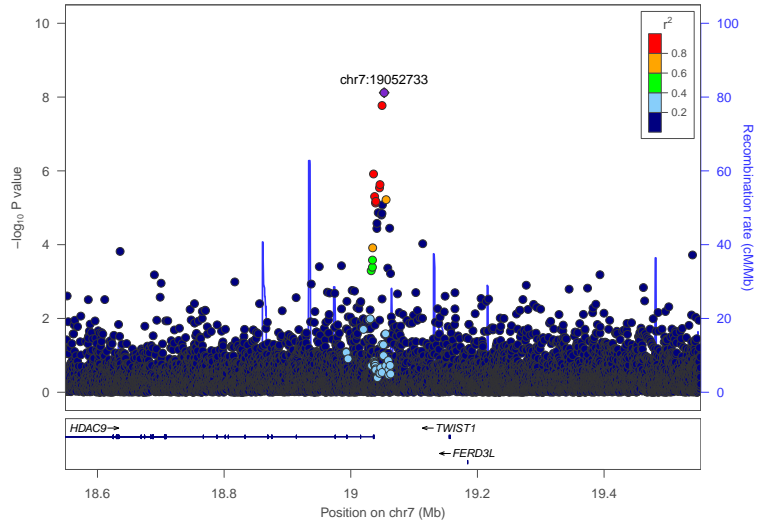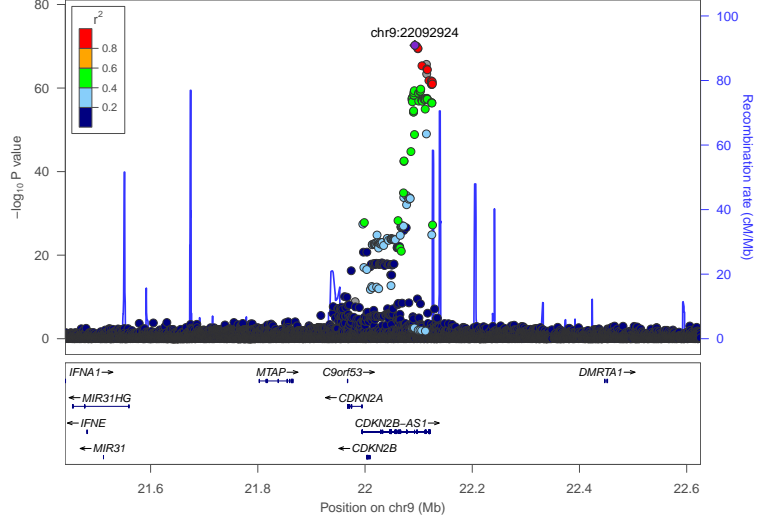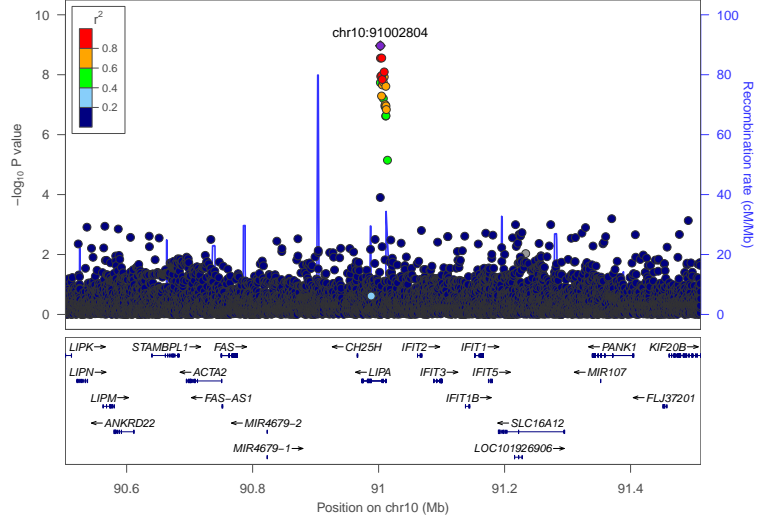

## 2. Previously reported 39 loci in Japanese GWAS

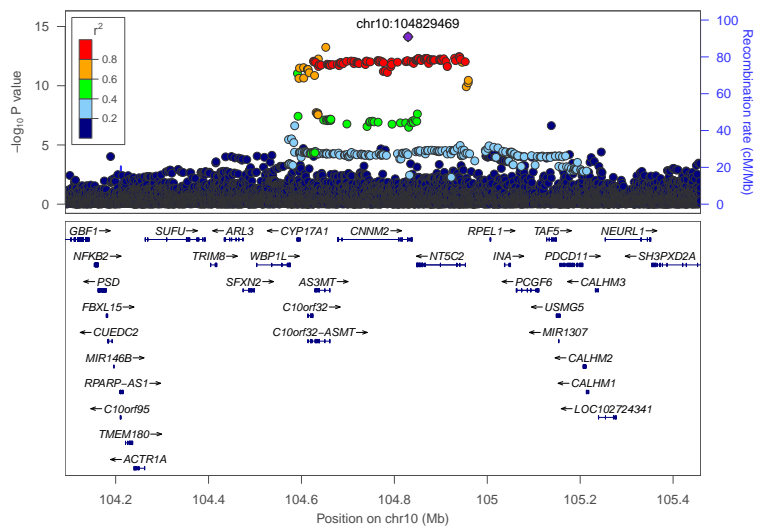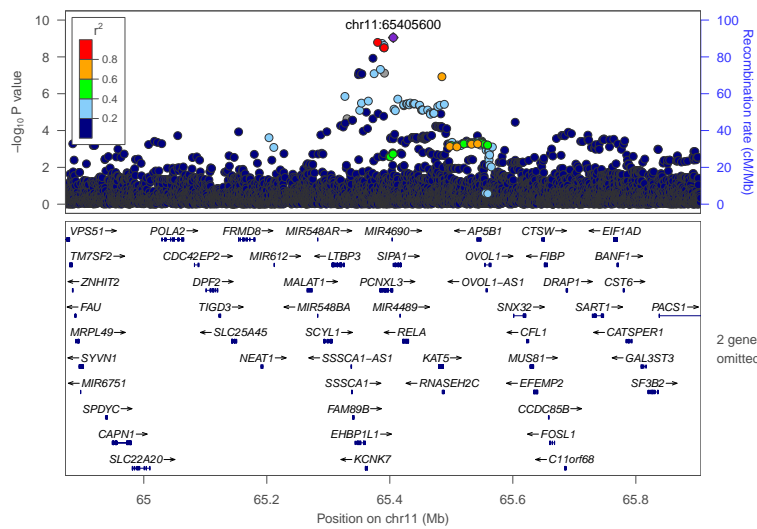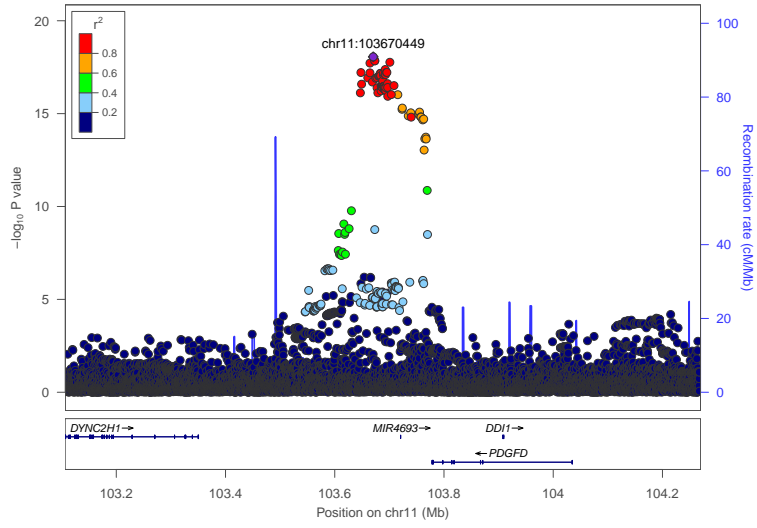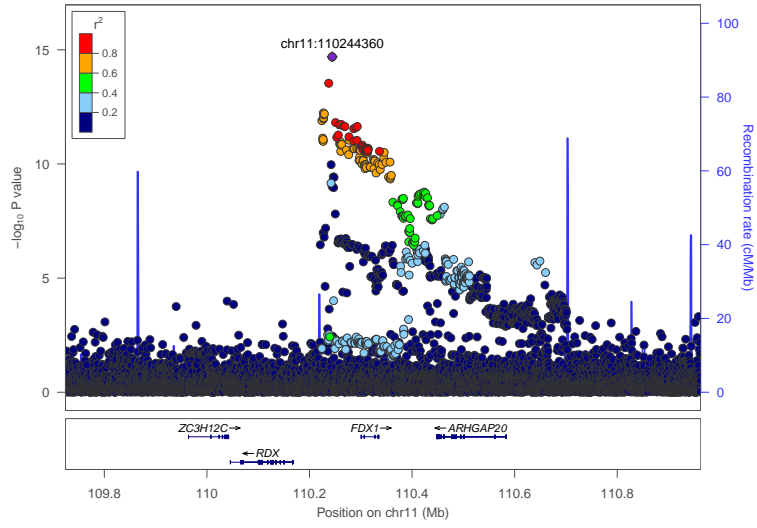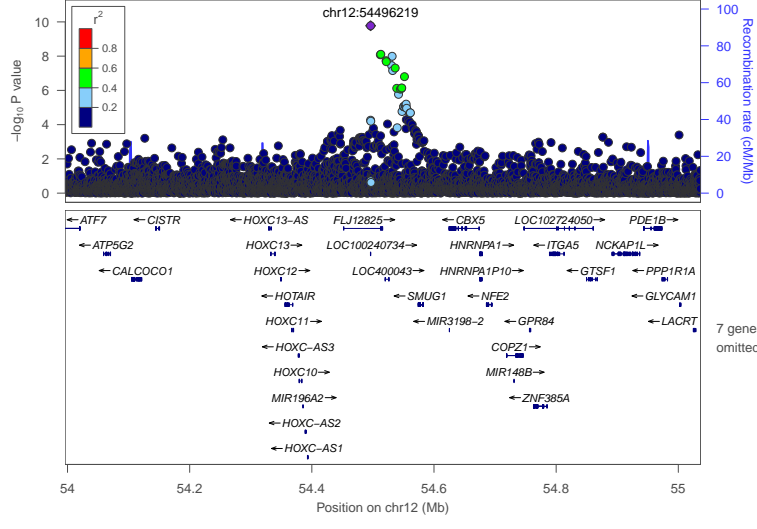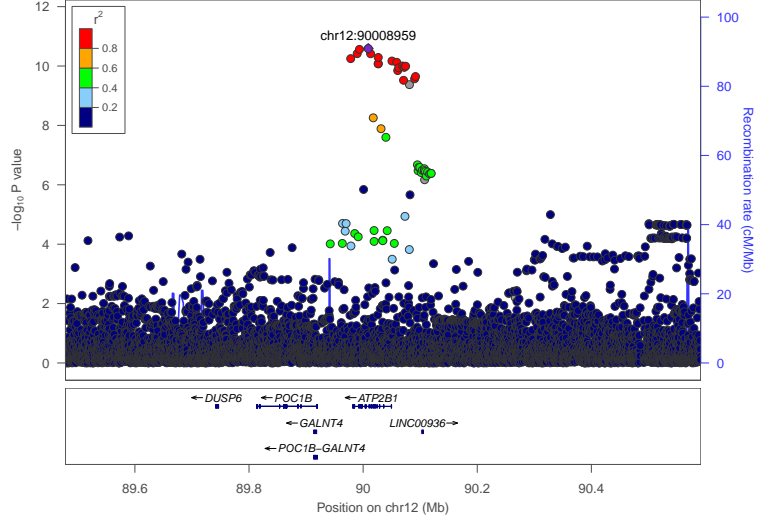

## 2. Previously reported 39 loci in Japanese GWAS

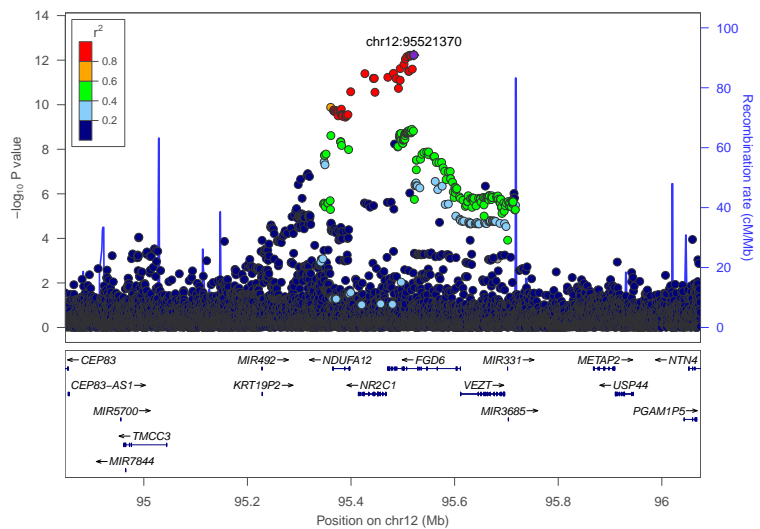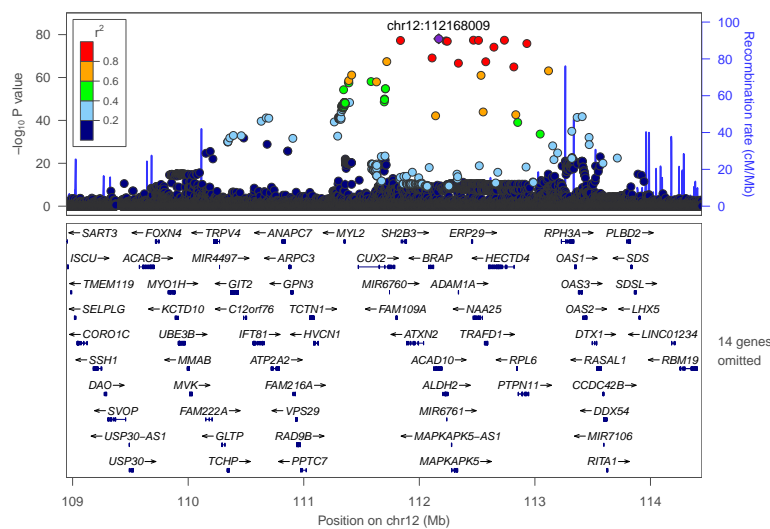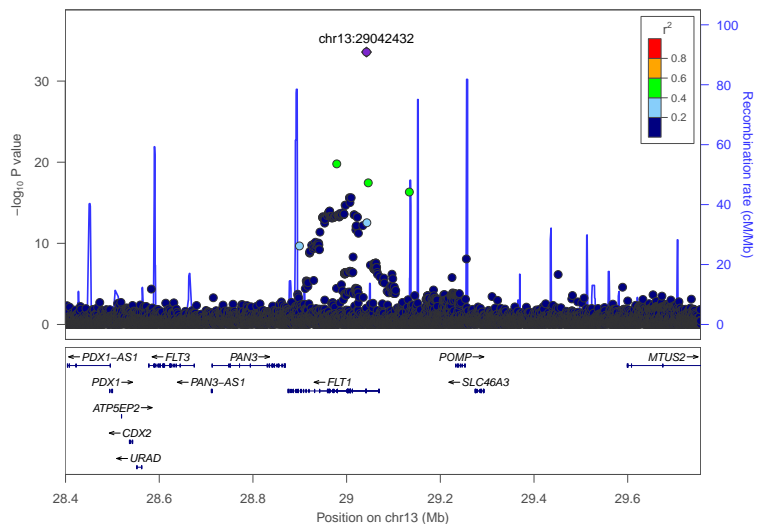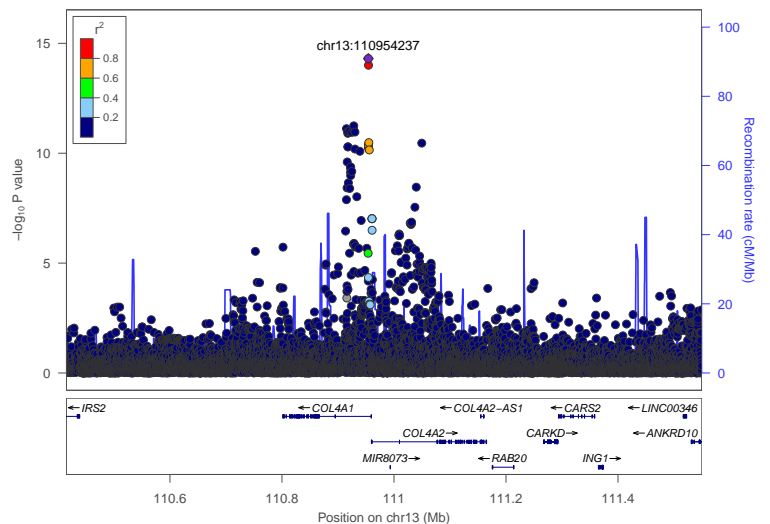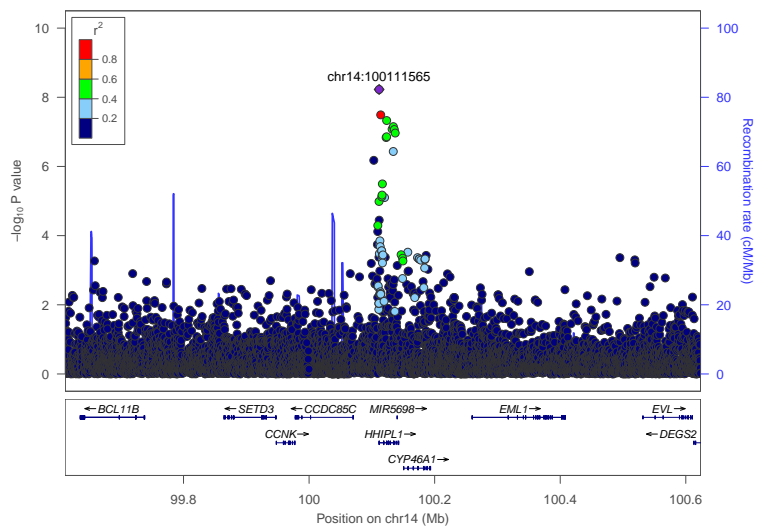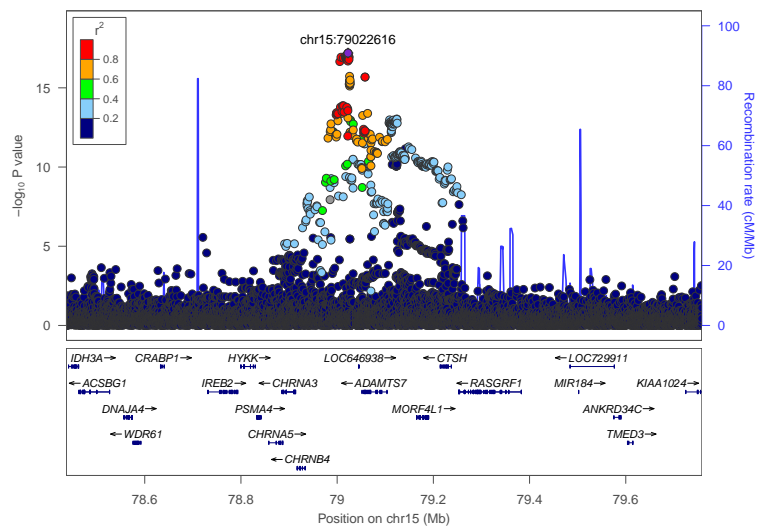



## 2. Previously reported 39 loci in Japanese GWAS

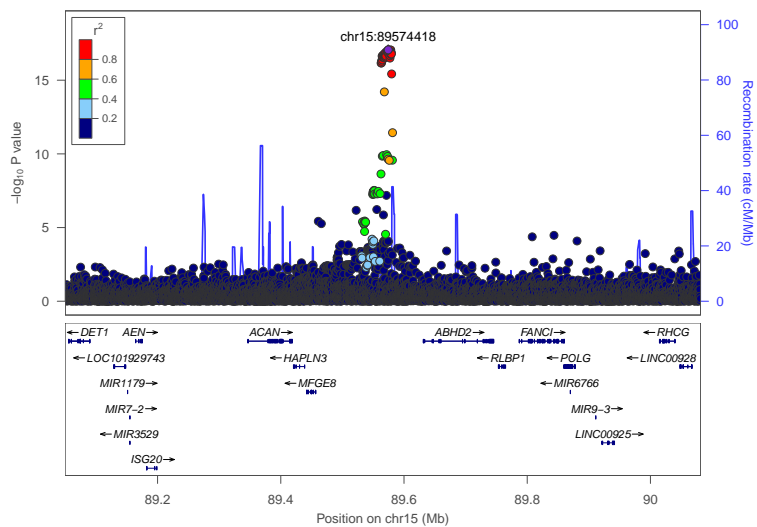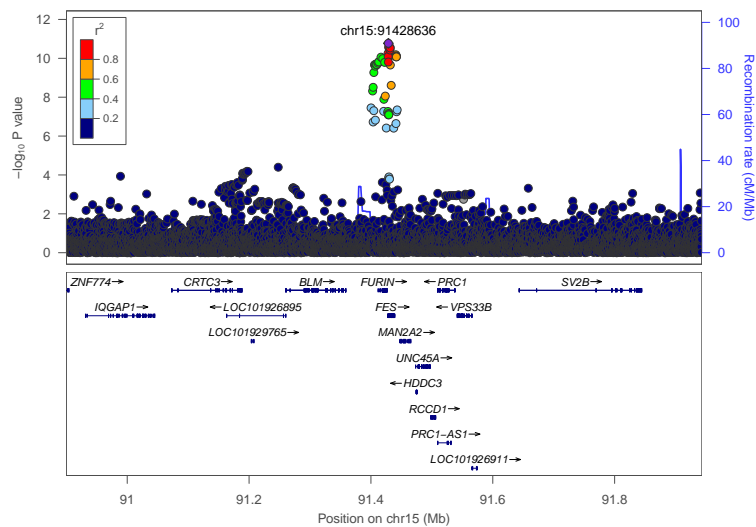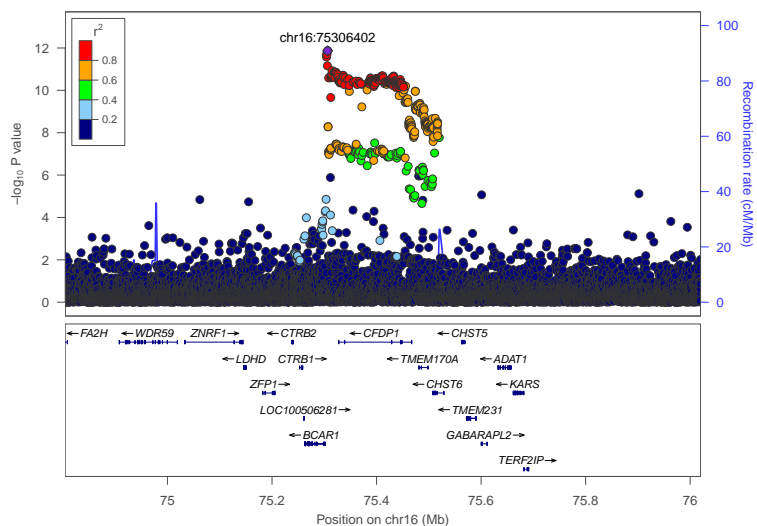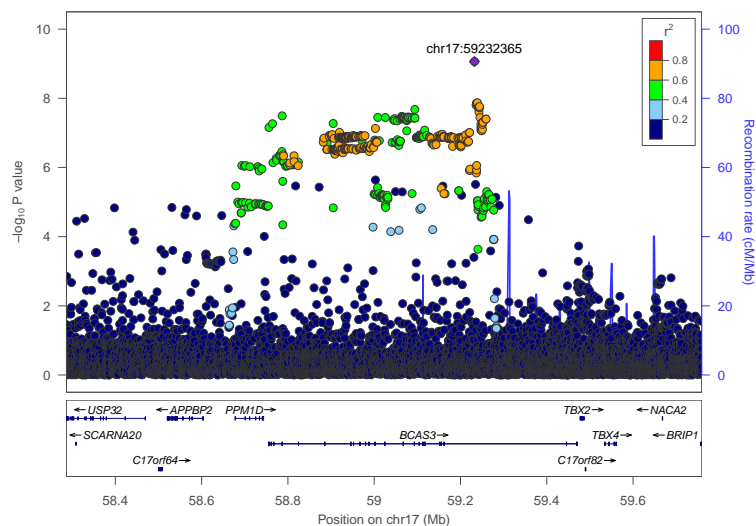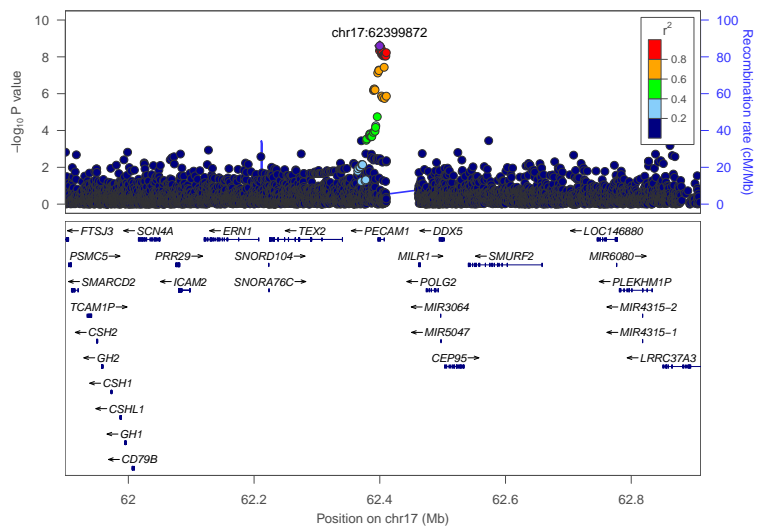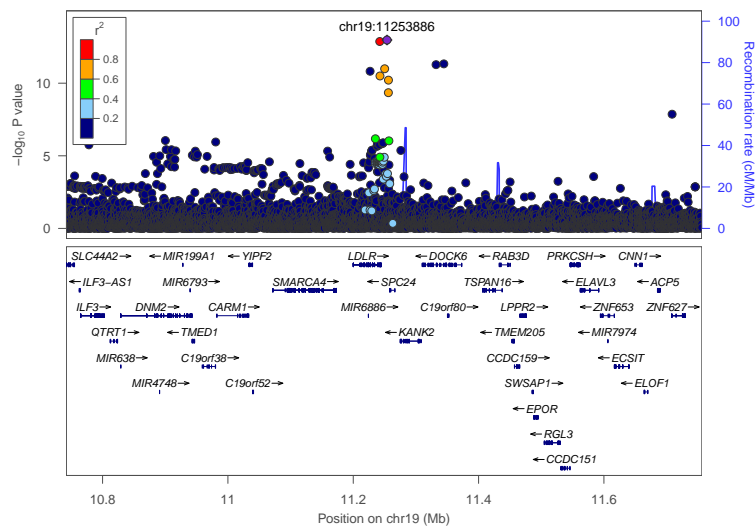

## 2. Previously reported 39 loci in Japanese GWAS

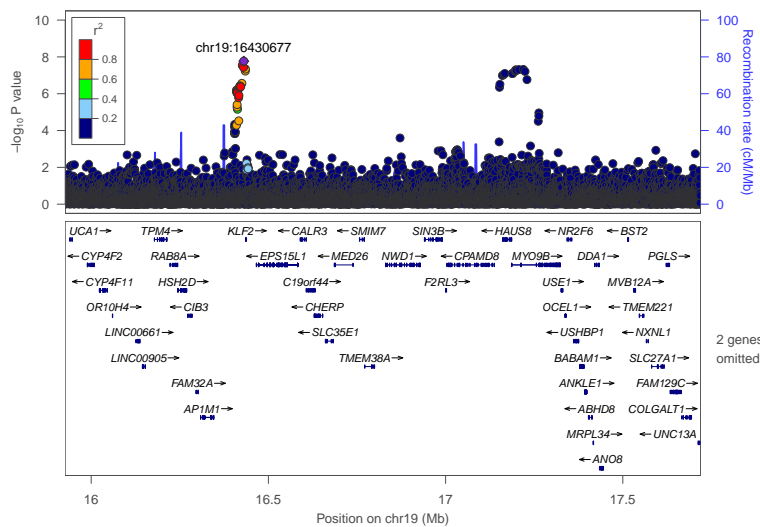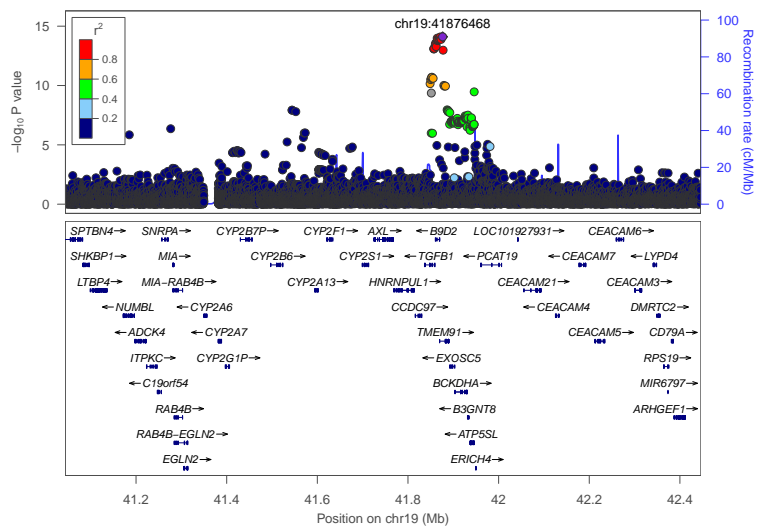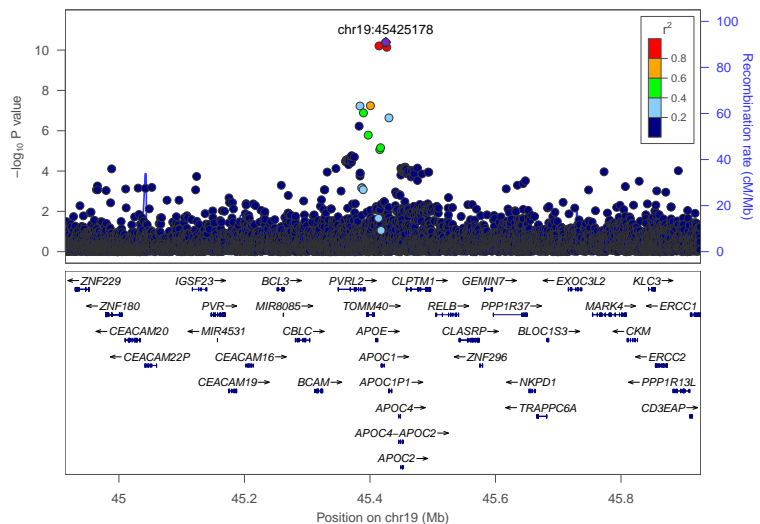

### 3. Newly identified 43 loci in Meta analysis

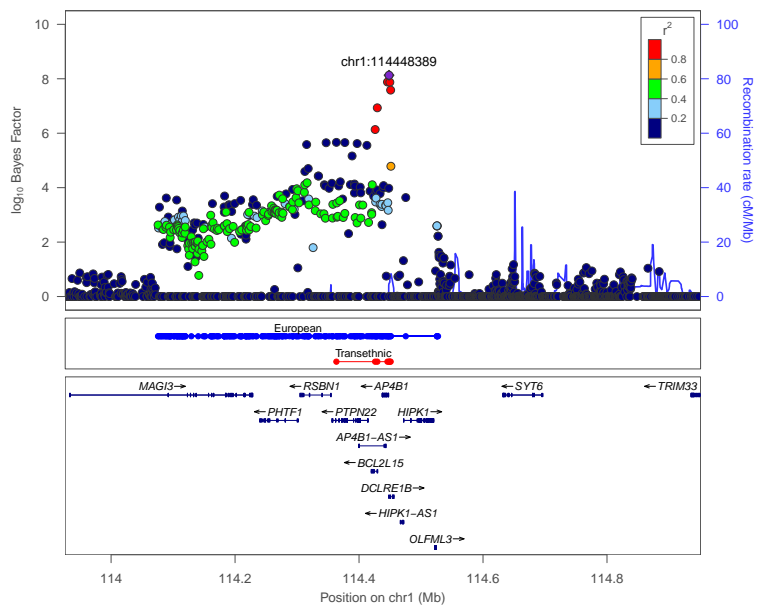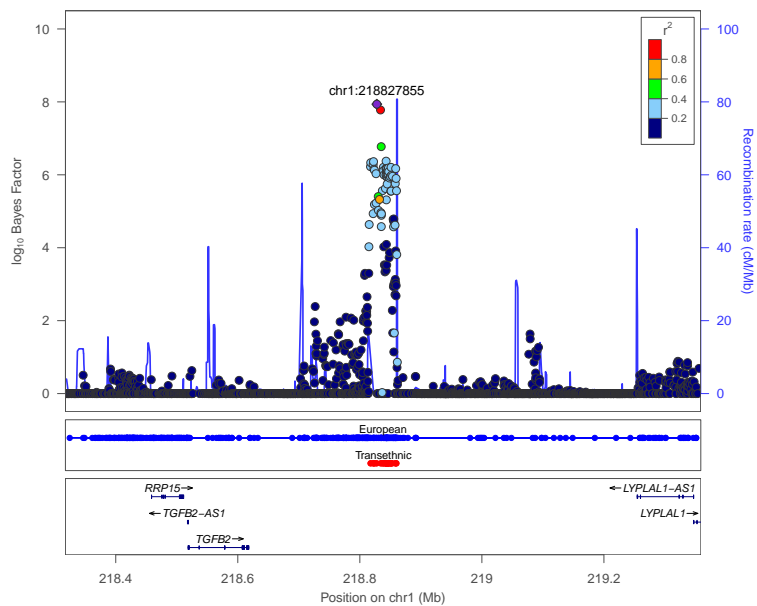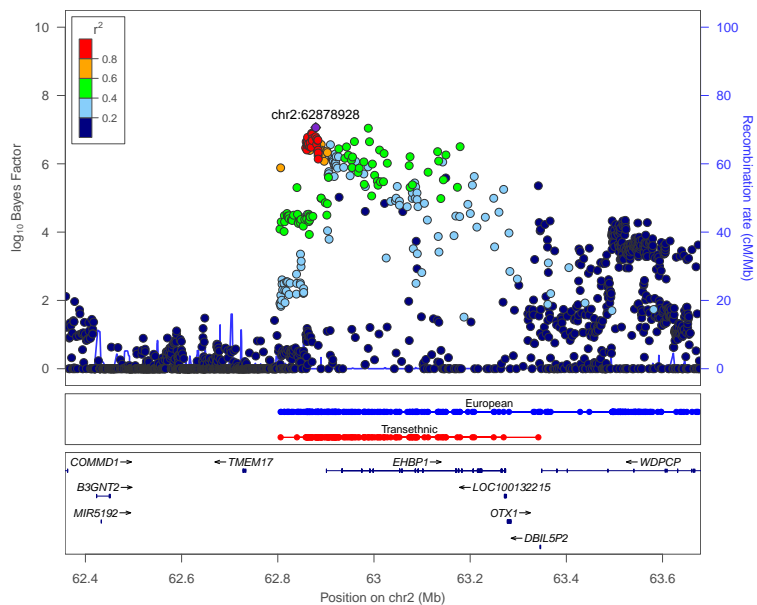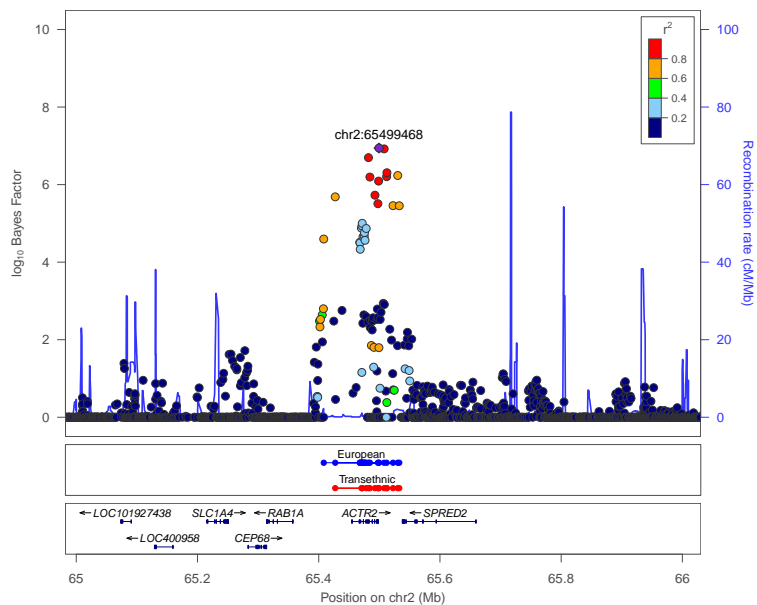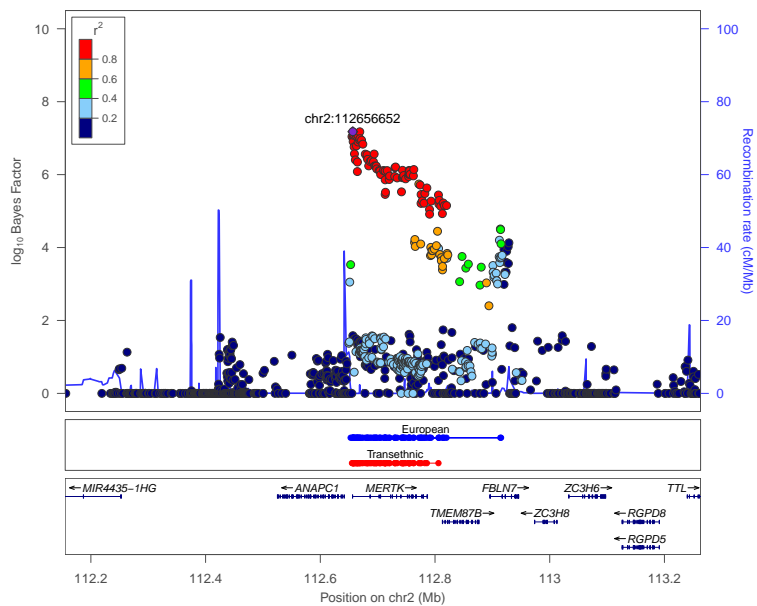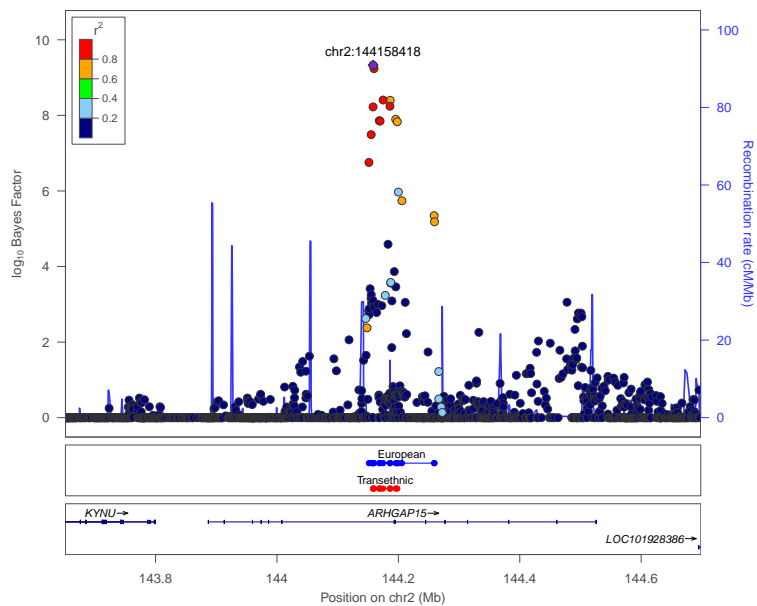

European: 99% credible set derived from European meta analysis  
 Transethnic: 99% credible set derived from transethnic meta analysis



### 3. Newly identified 43 loci in Meta analysis

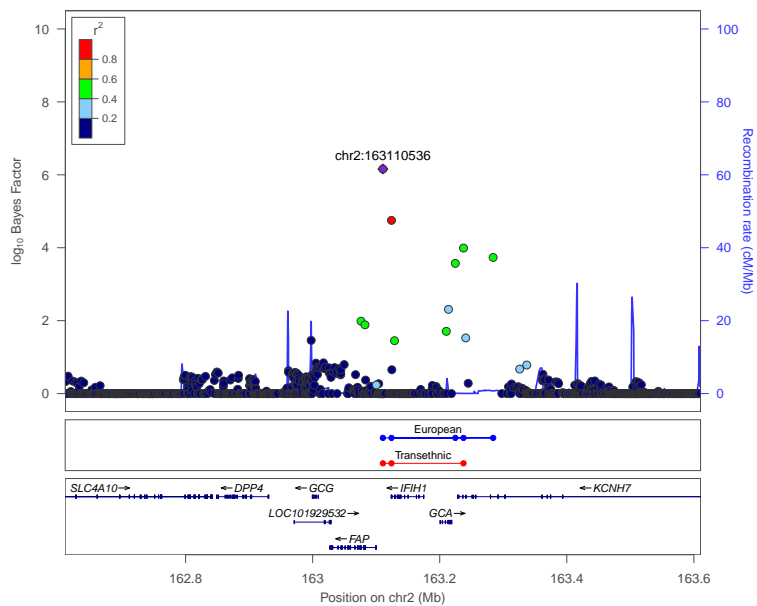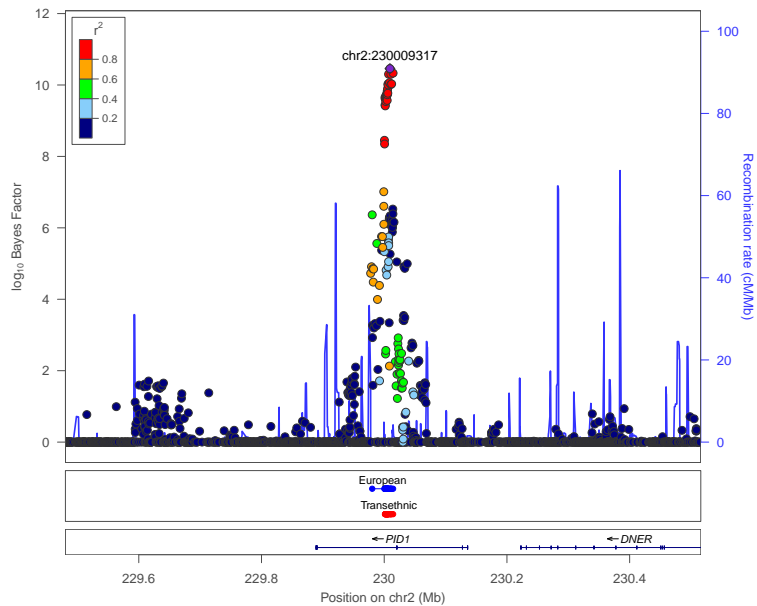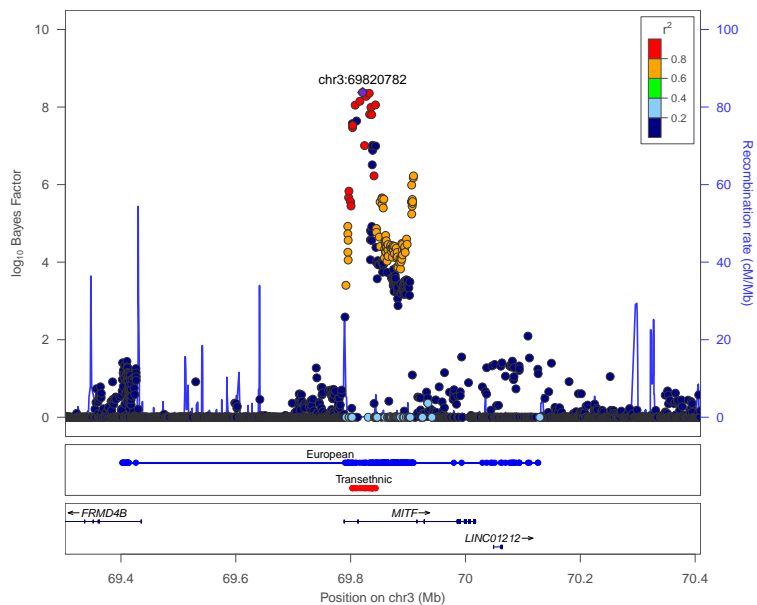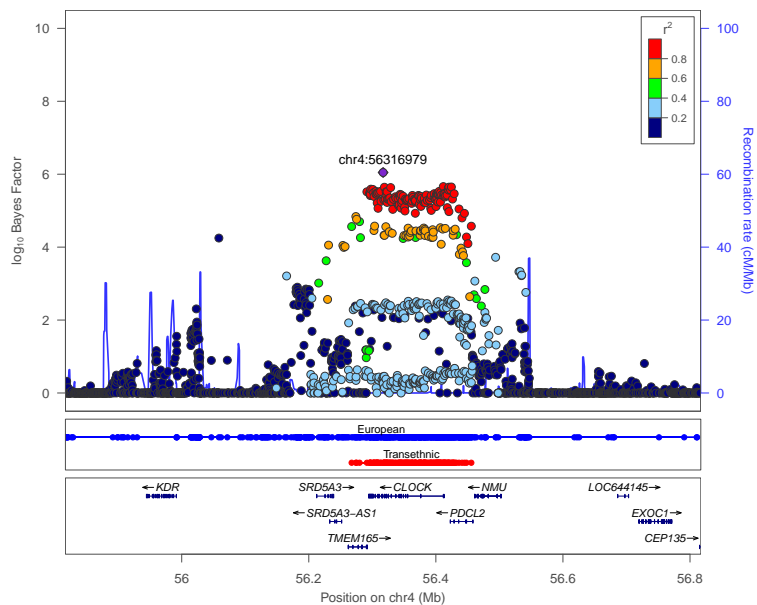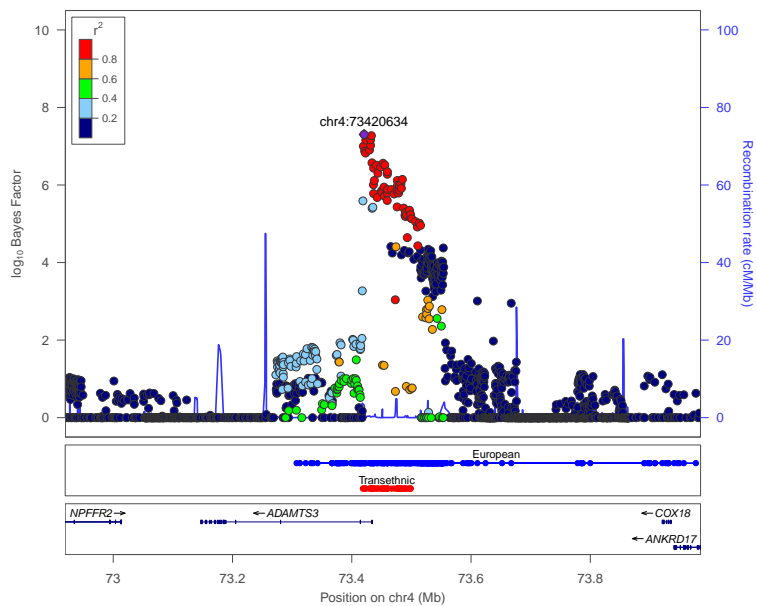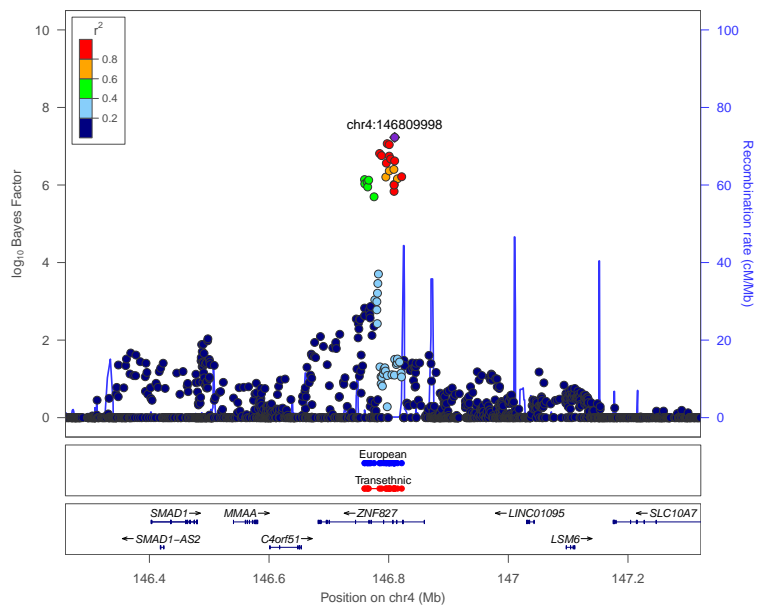

European: 99% credible set derived from European meta analysis  
 Transethnic: 99% credible set derived from transethnic meta analysis

### 3. Newly identified 43 loci in Meta analysis

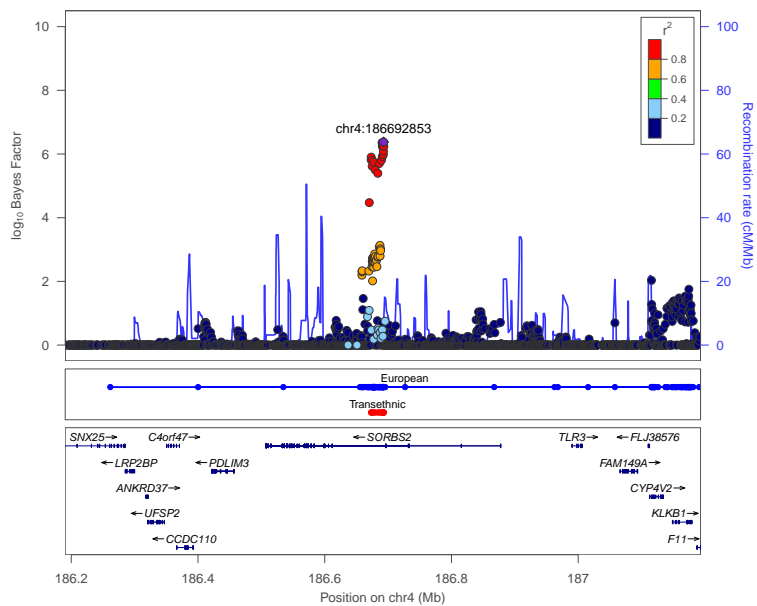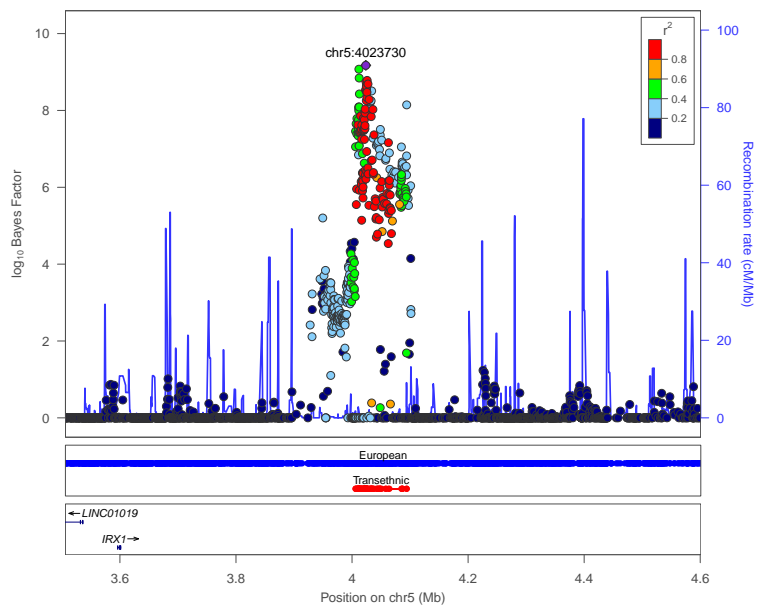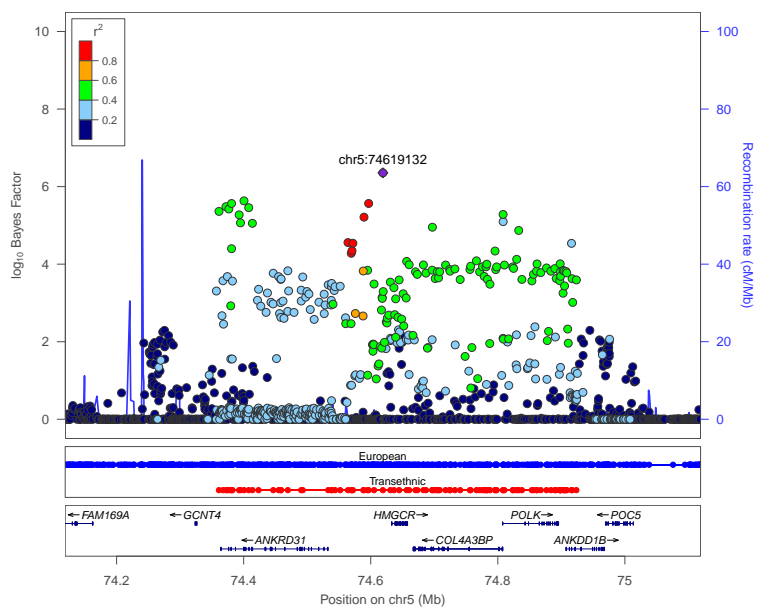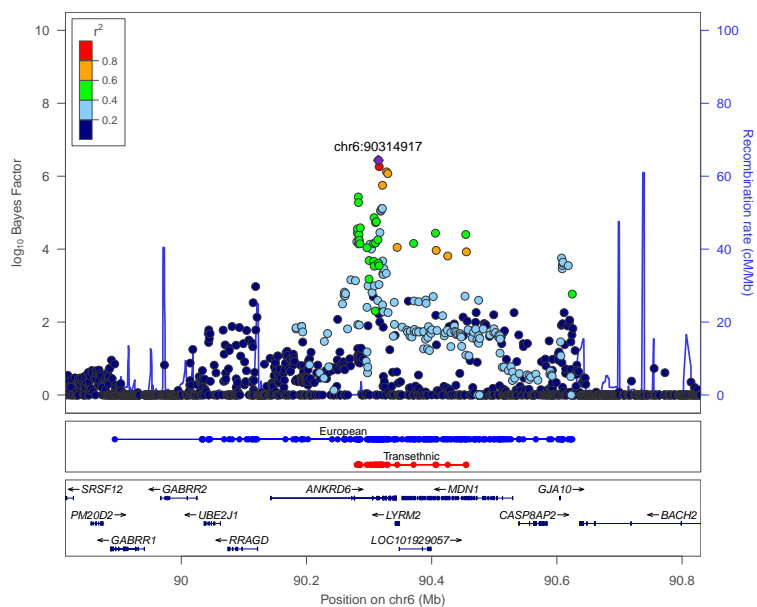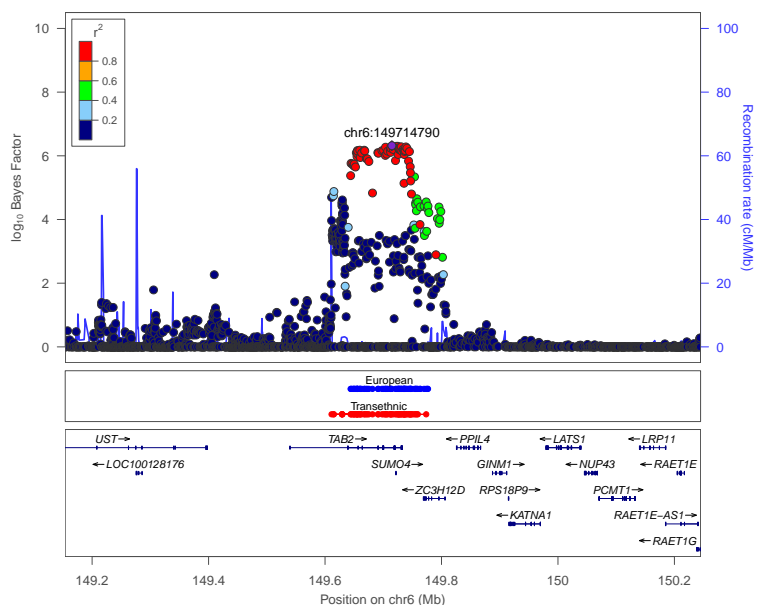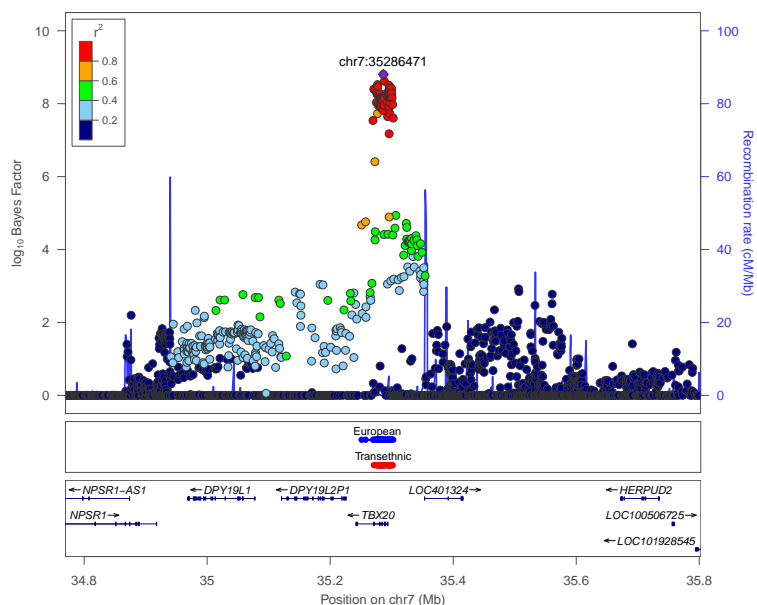

European: 99% credible set derived from European meta analysis  
 Transethnic: 99% credible set derived from transethnic meta analysis

### 3. Newly identified 43 loci in Meta analysis

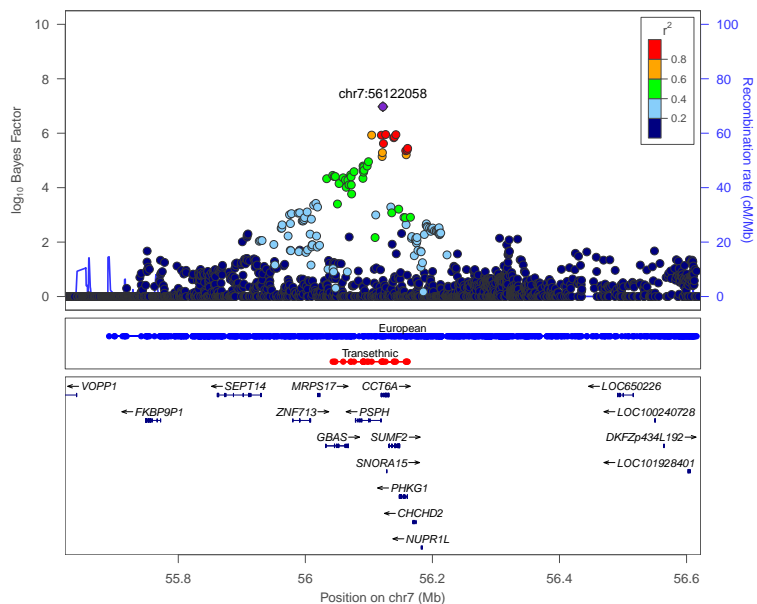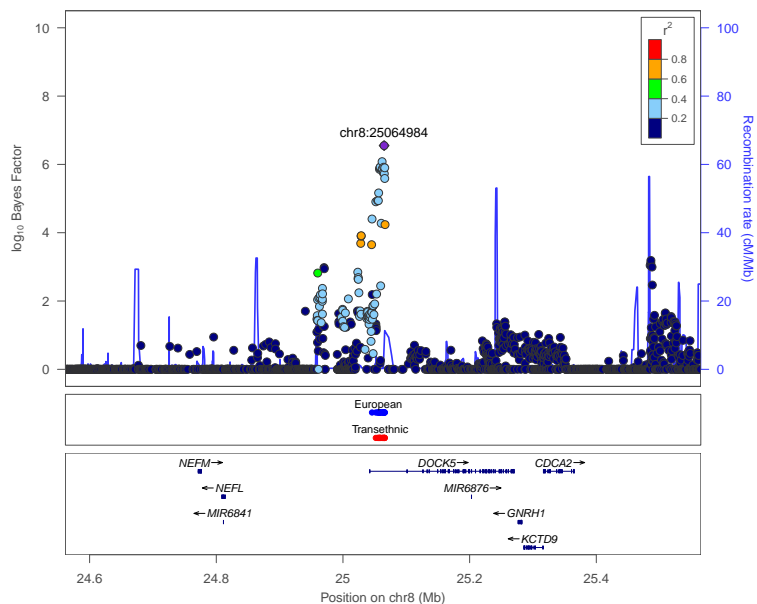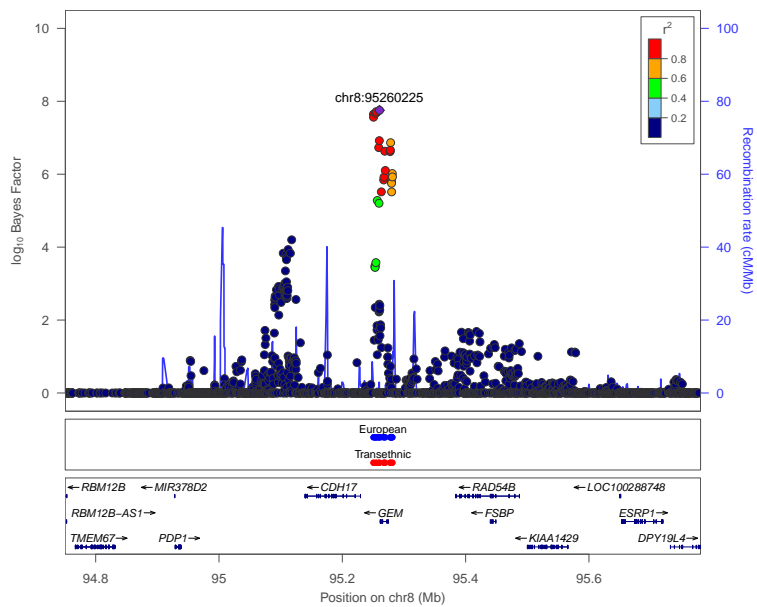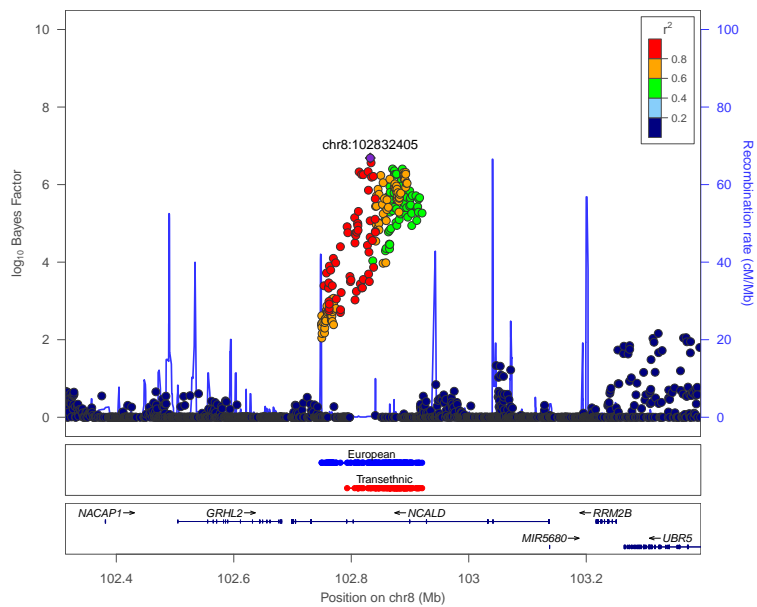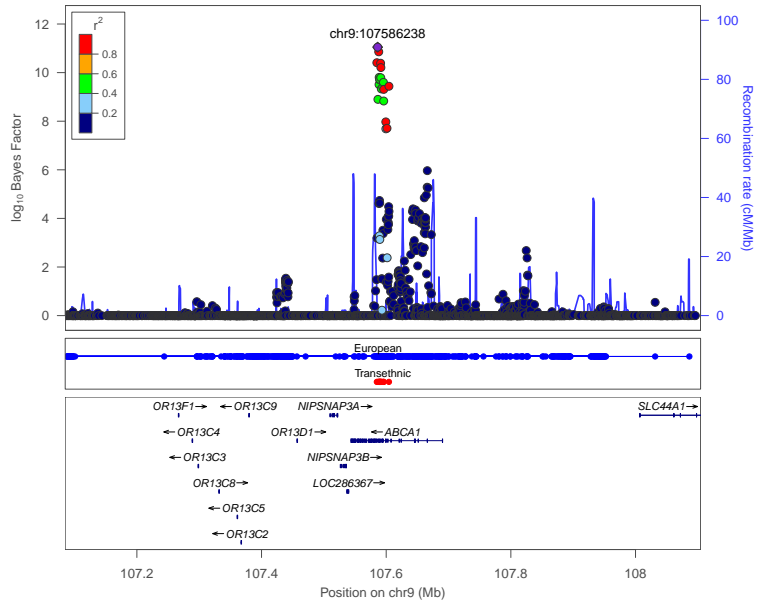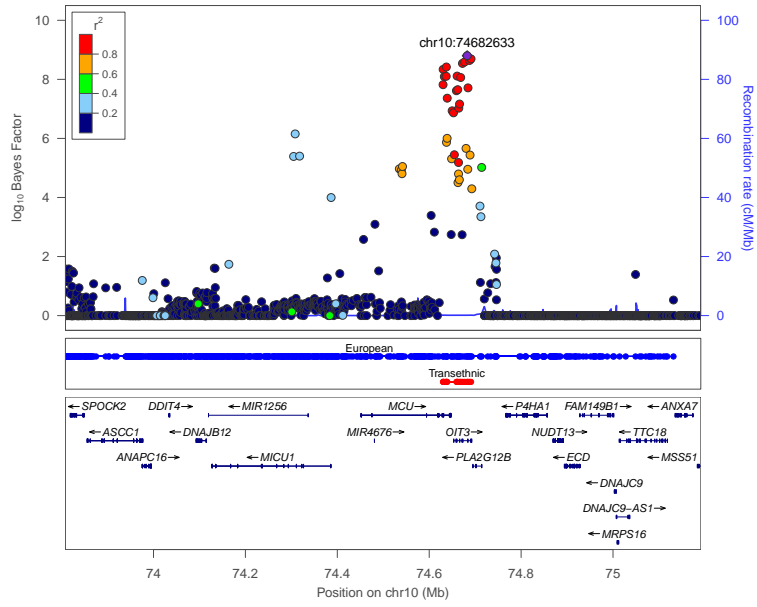

European: 99% credible set derived from European meta analysis  
 Transethnic: 99% credible set derived from transethnic meta analysis

### 3. Newly identified 43 loci in Meta analysis

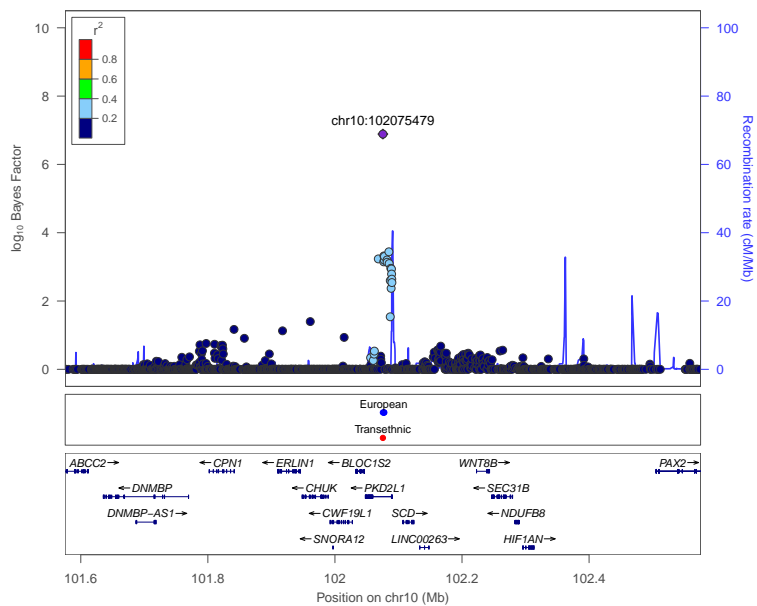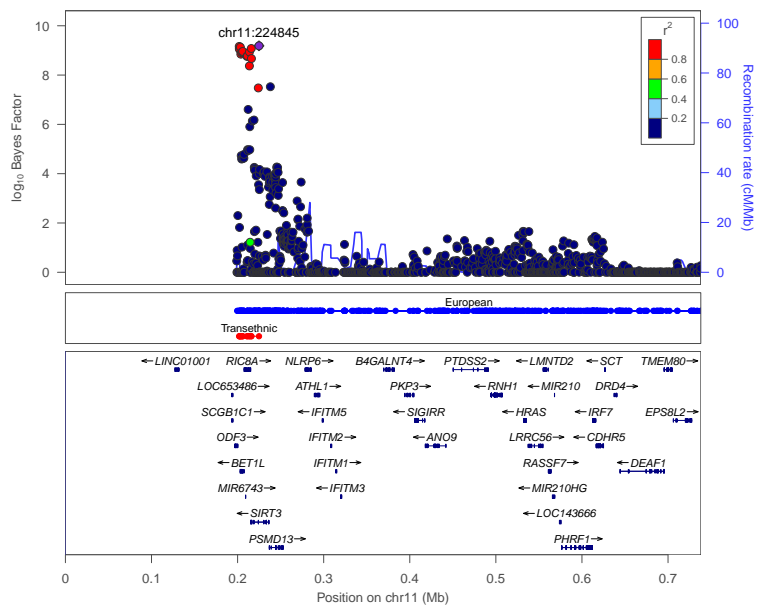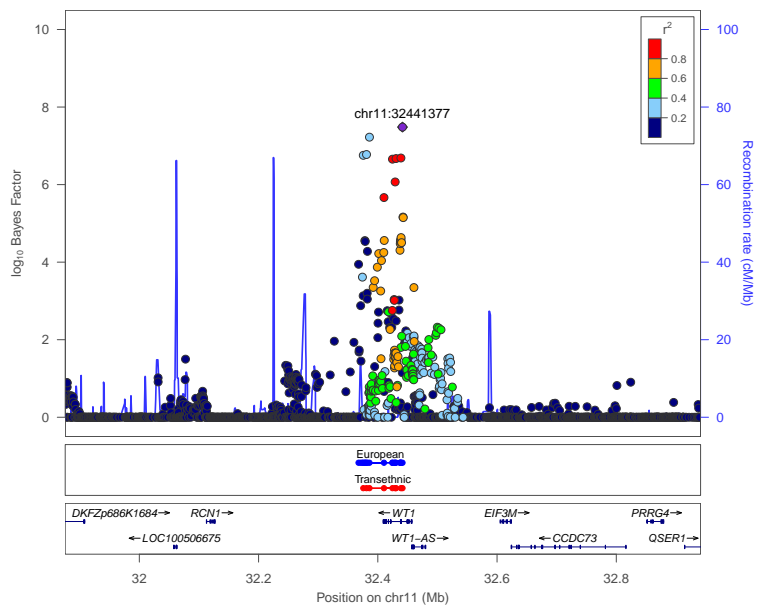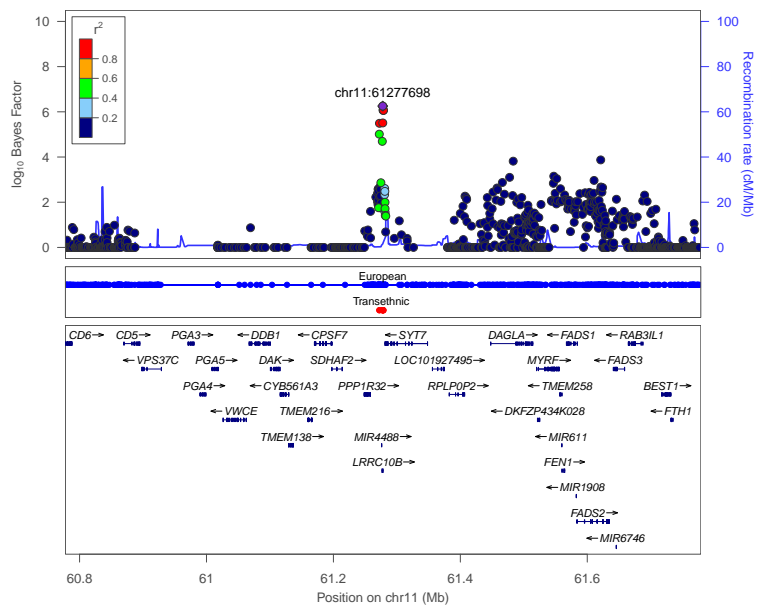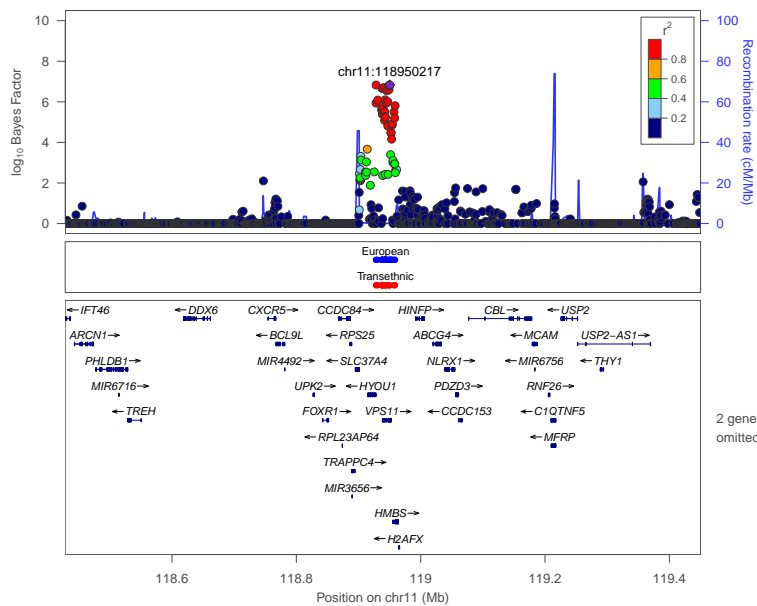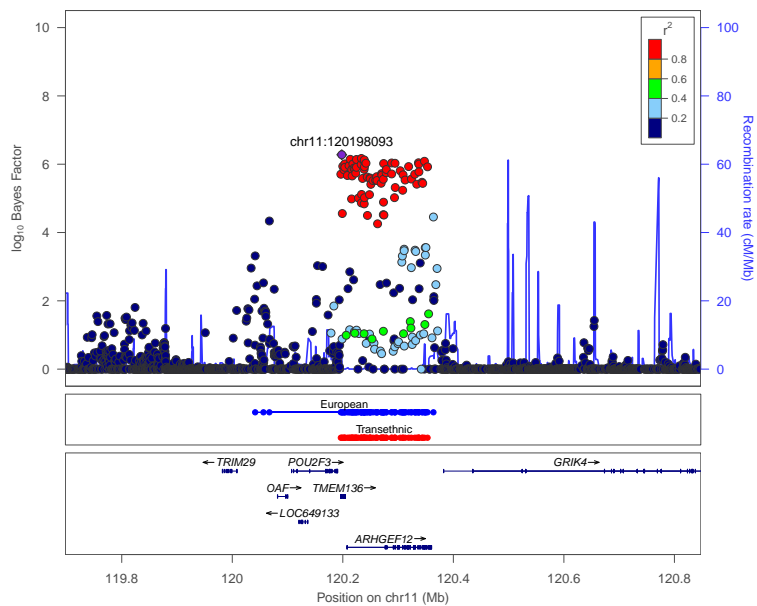

European: 99% credible set derived from European meta analysis  
 Transethnic: 99% credible set derived from transethnic meta analysis

### 3. Newly identified 43 loci in Meta analysis

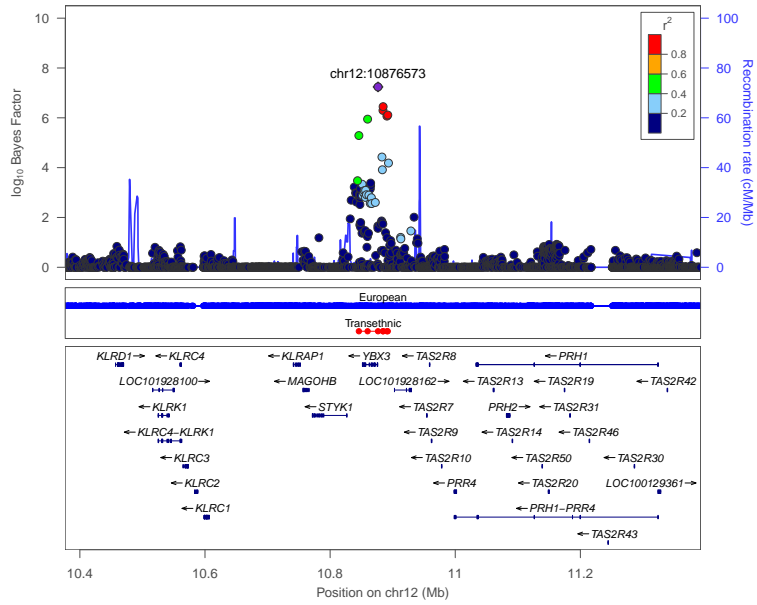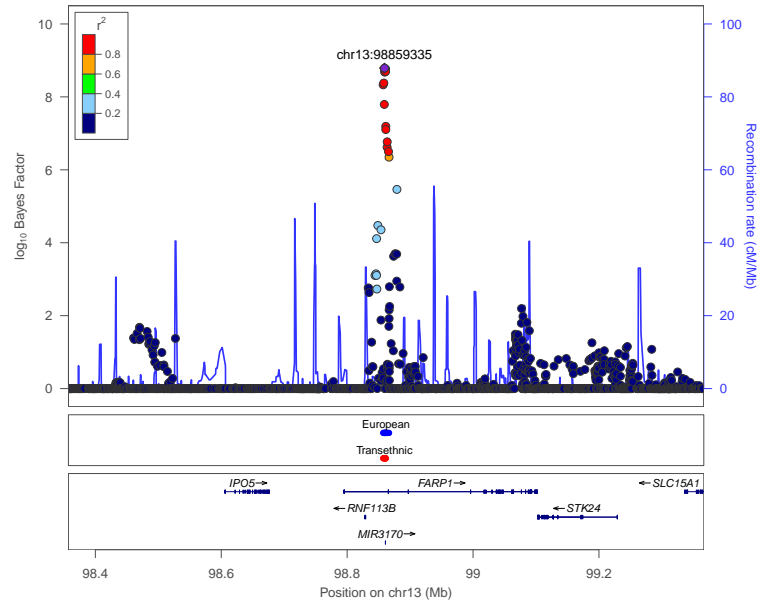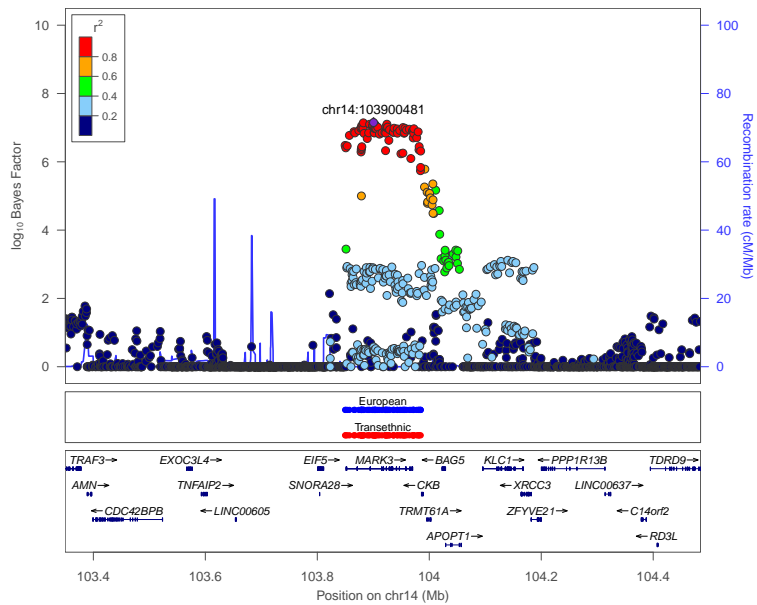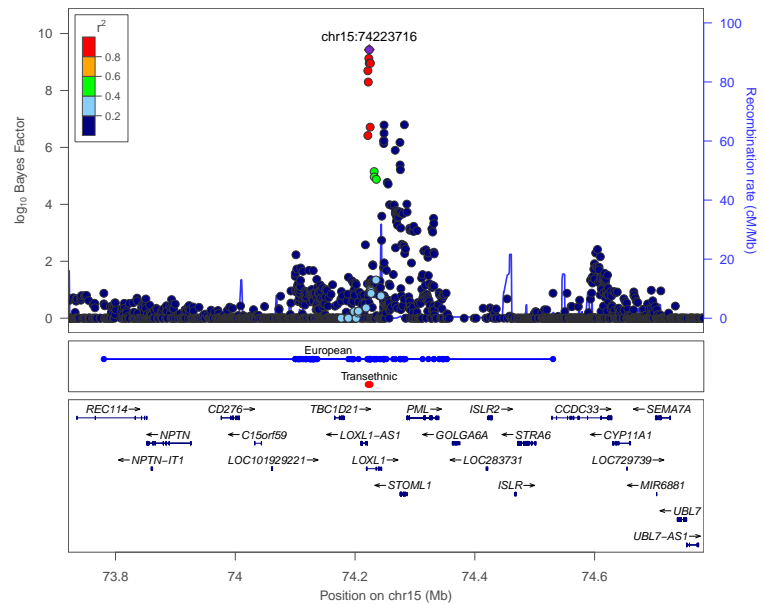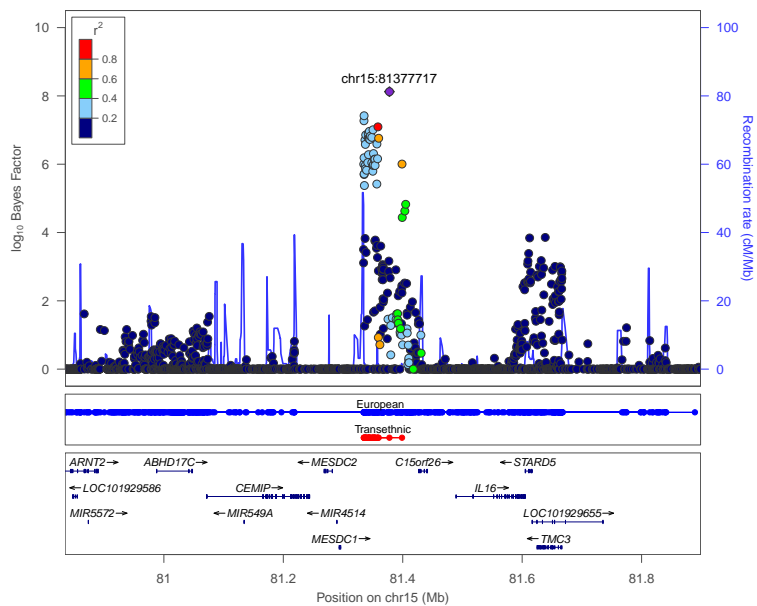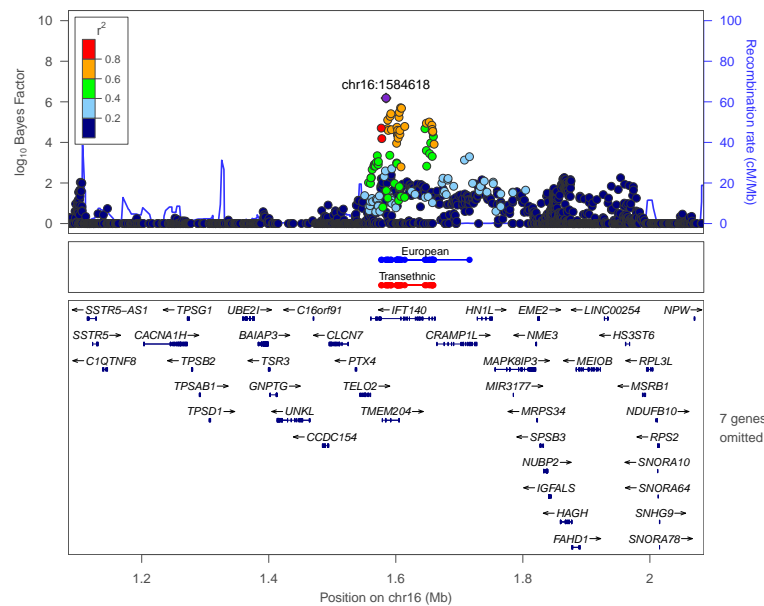

European: 99% credible set derived from European meta analysis  
 Transethnic: 99% credible set derived from transethnic meta analysis

### 3. Newly identified 43 loci in Meta analysis

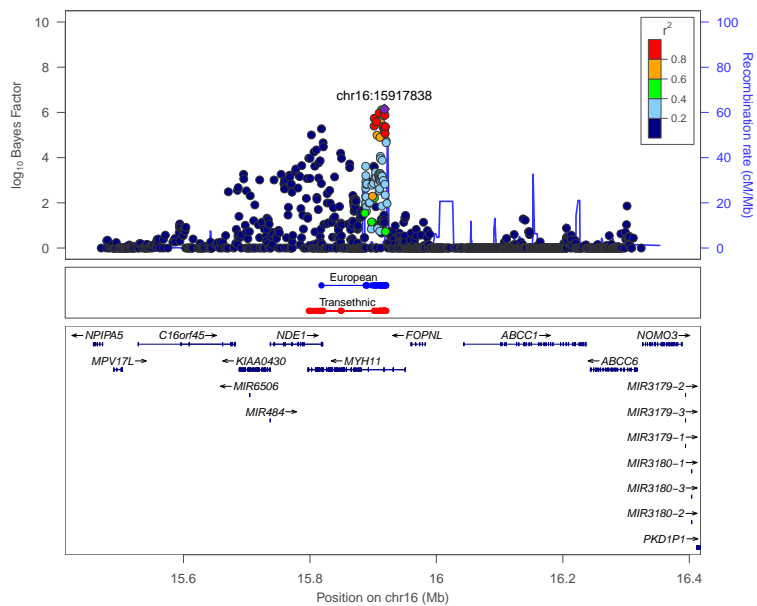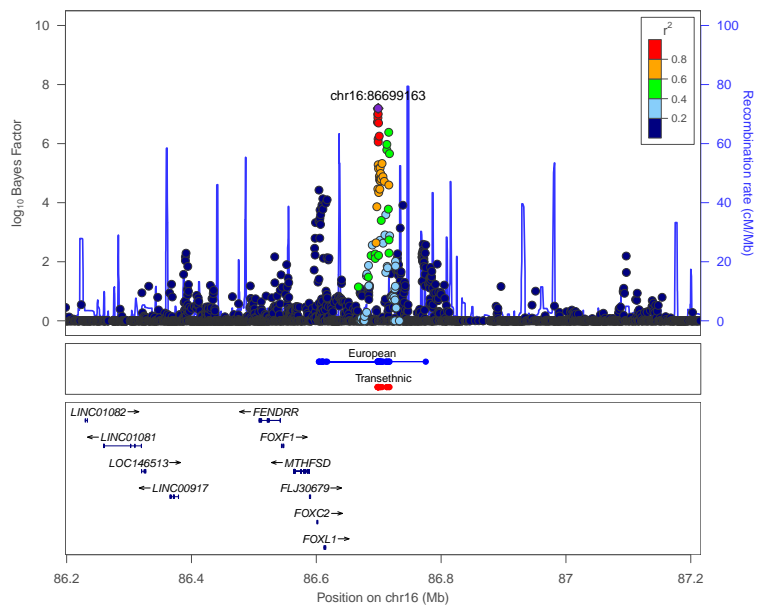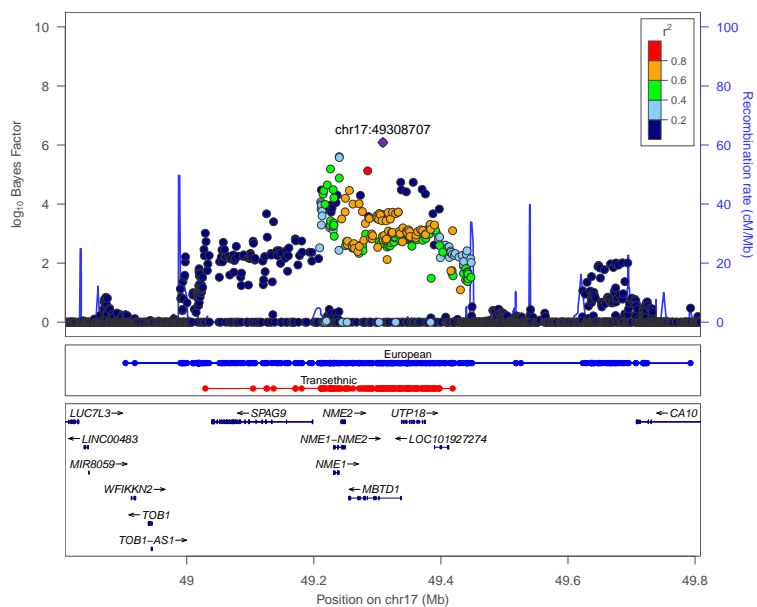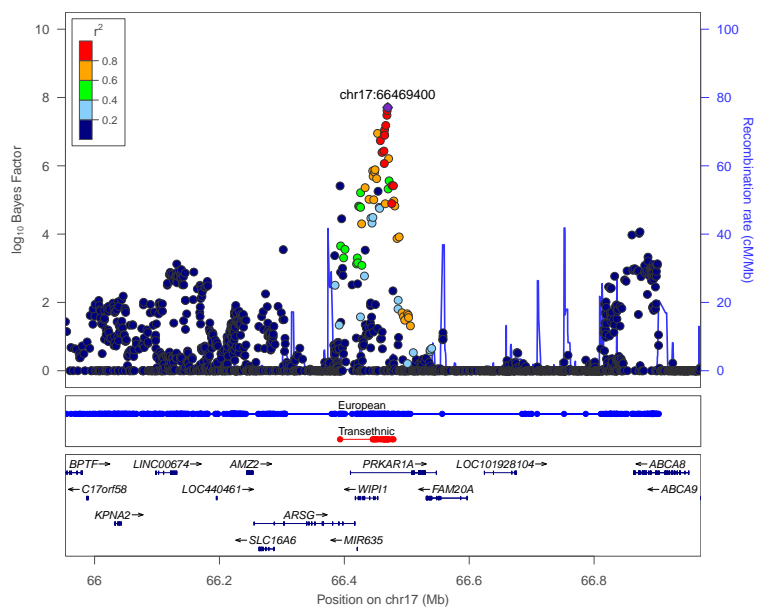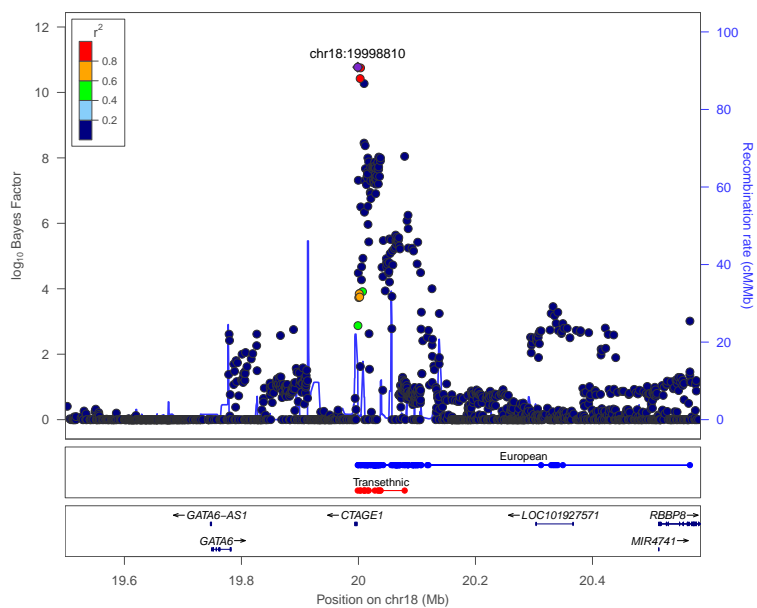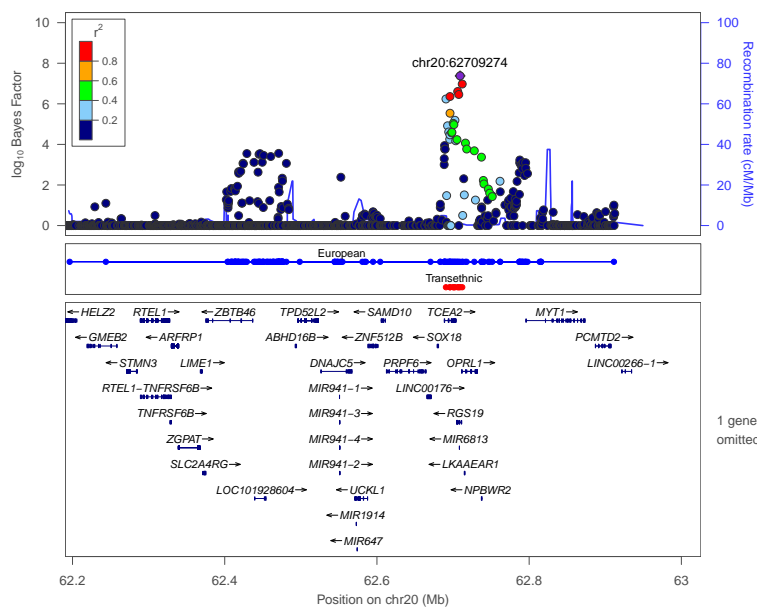

European: 99% credible set derived from European meta analysis

Transethnic: 99% credible set derived from transethnic meta analysis

1 gene omitted

### 3. Newly identified 43 loci in Meta analysis

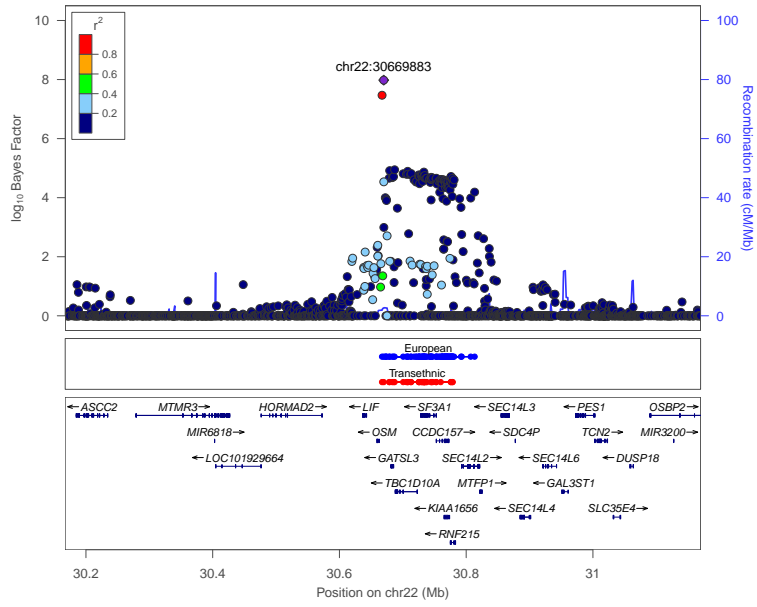

**European:** 99% credible set derived from European meta analysis  
**Transethnic:** 99% credible set derived from transethnic meta analysis



## 4. Previously reported 133 loci in Meta analysis

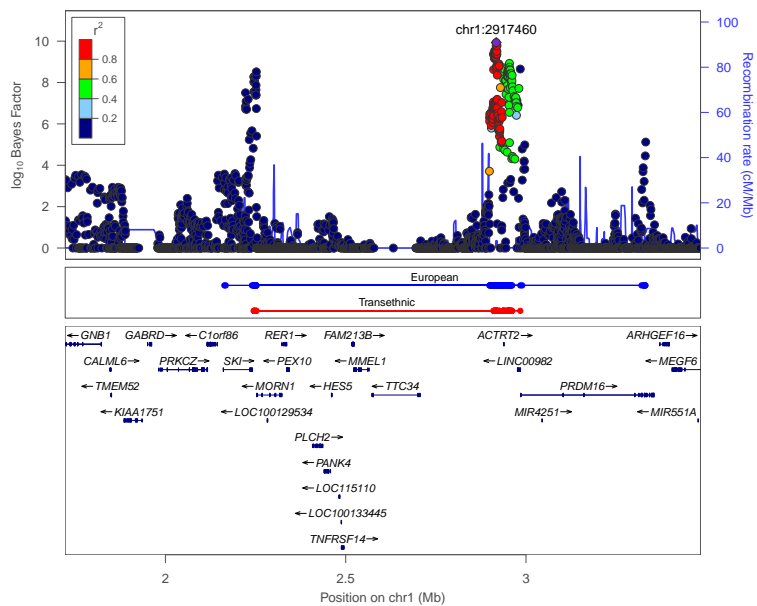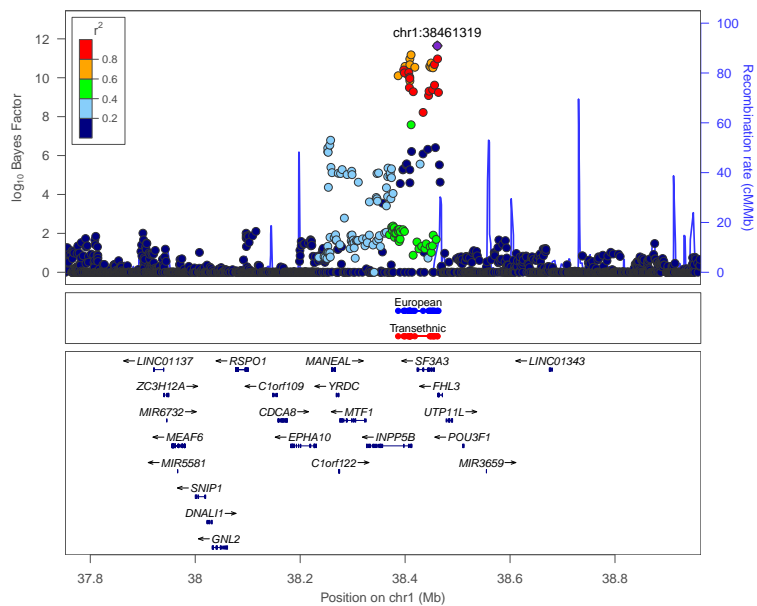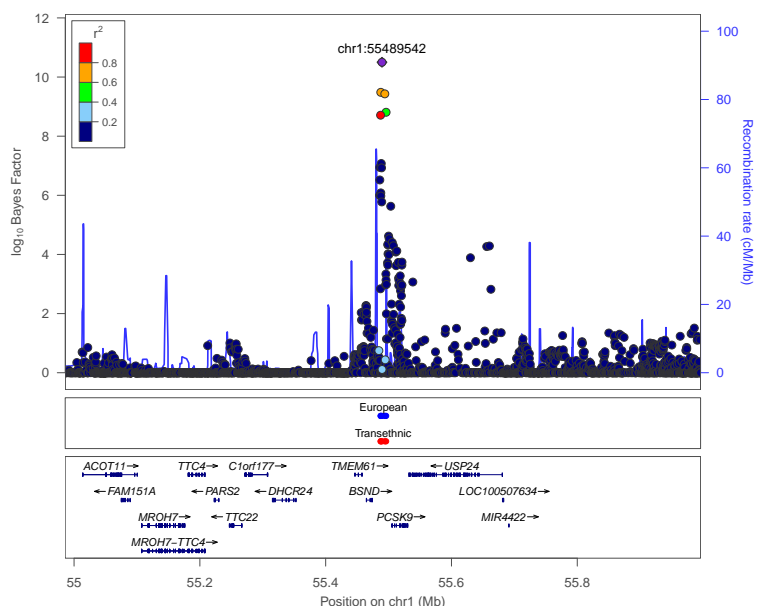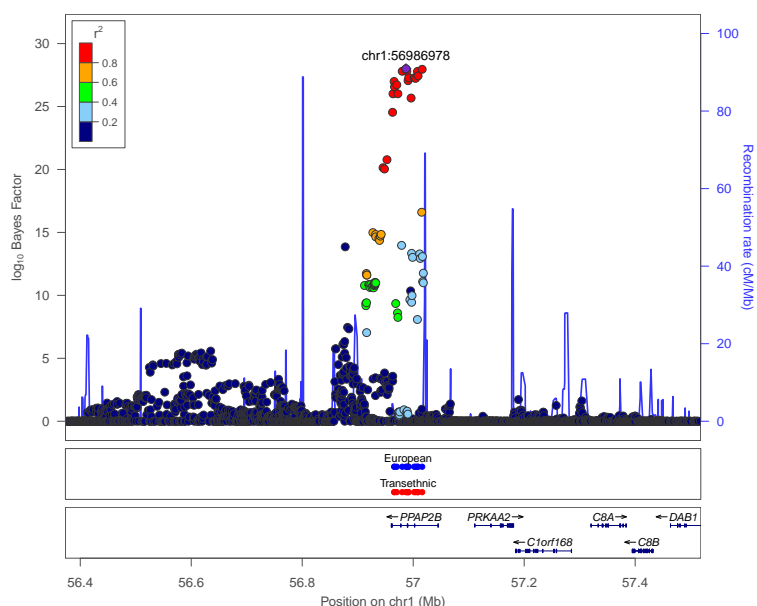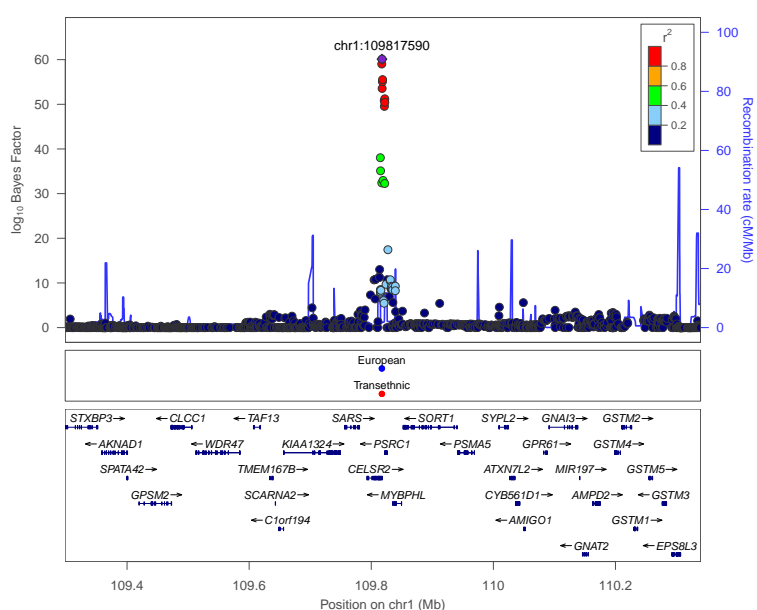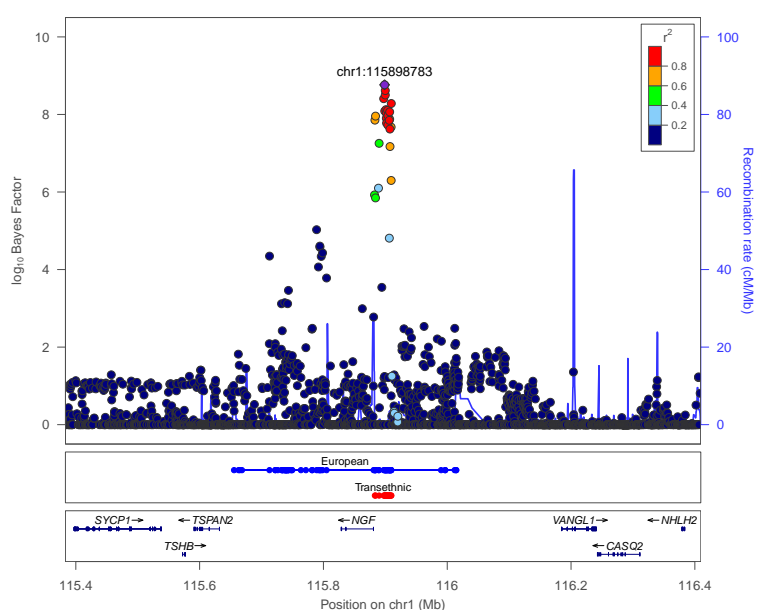

European: 99% credible set derived from European meta analysis  
 Transethnic: 99% credible set derived from transethnic meta analysis

# 4. Previously reported 133 loci in Meta analysis

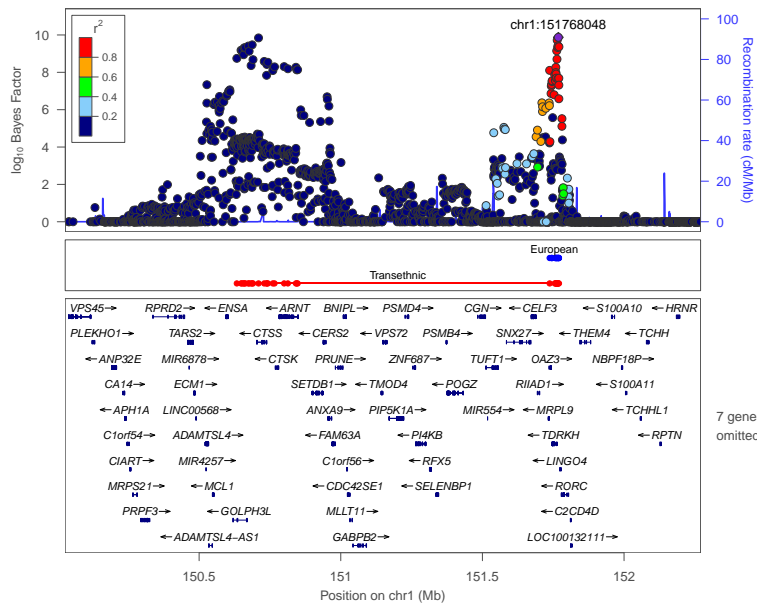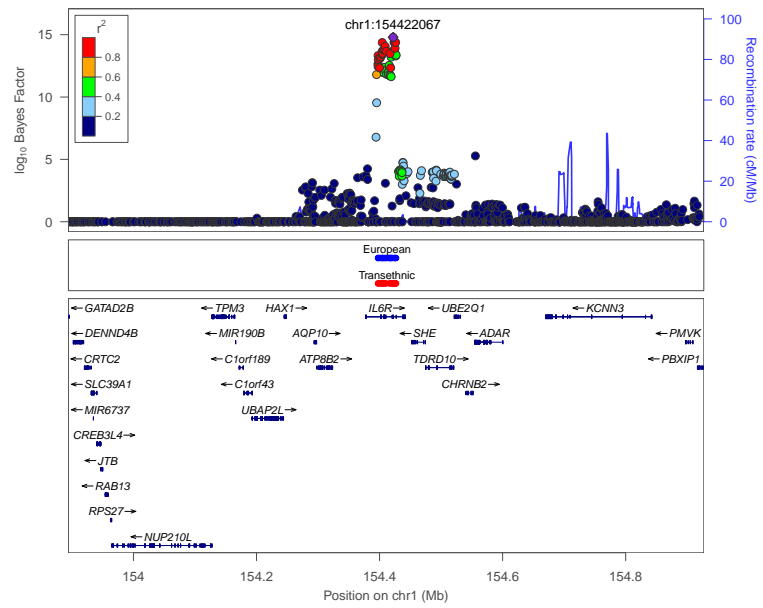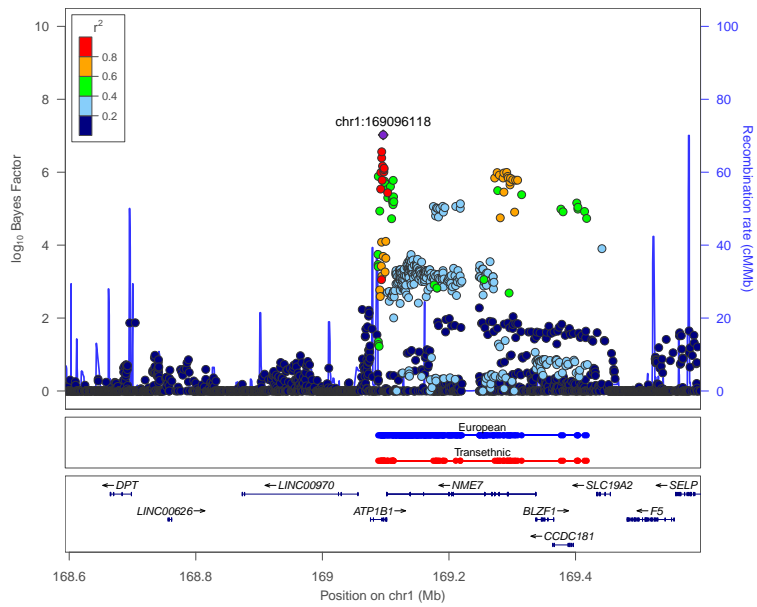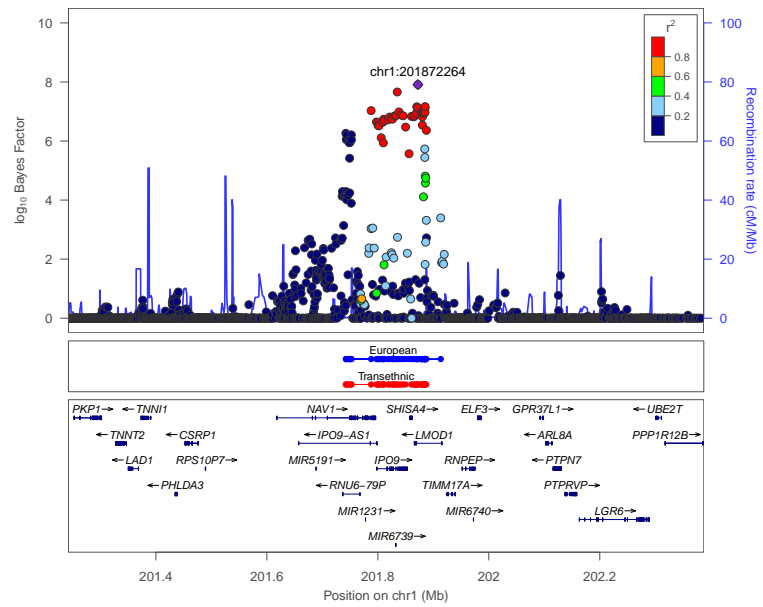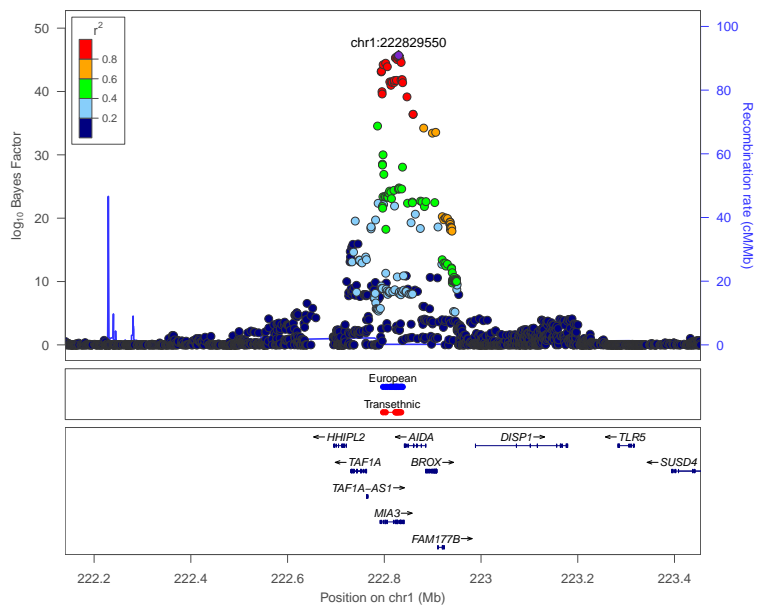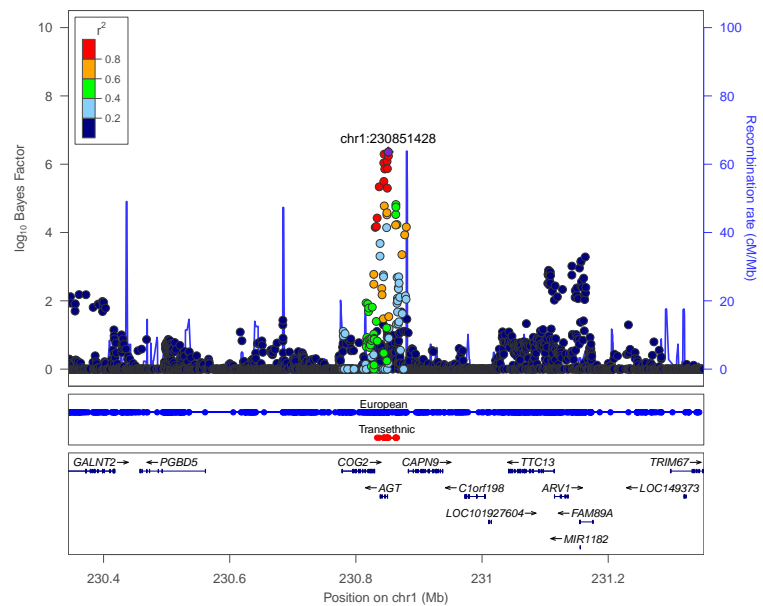

European: 99% credible set derived from European meta analysis  
 Transethnic: 99% credible set derived from transethnic meta analysis

# 4. Previously reported 133 loci in Meta analysis

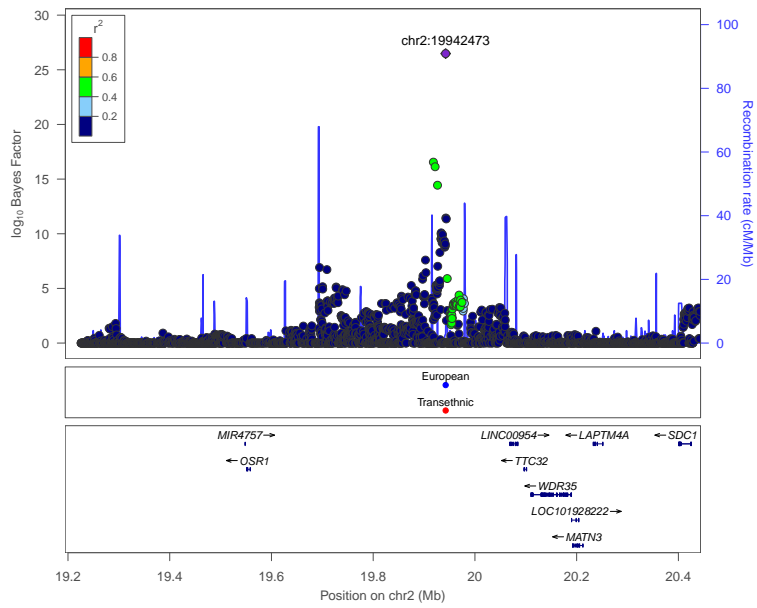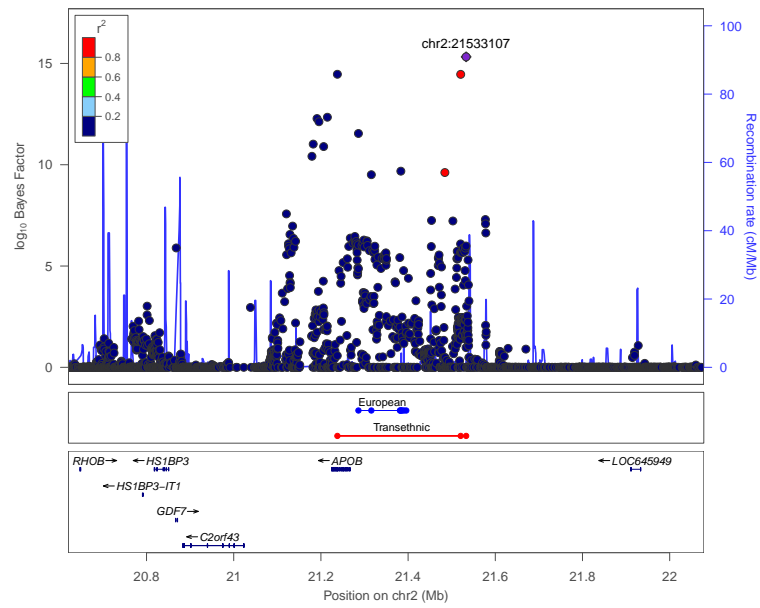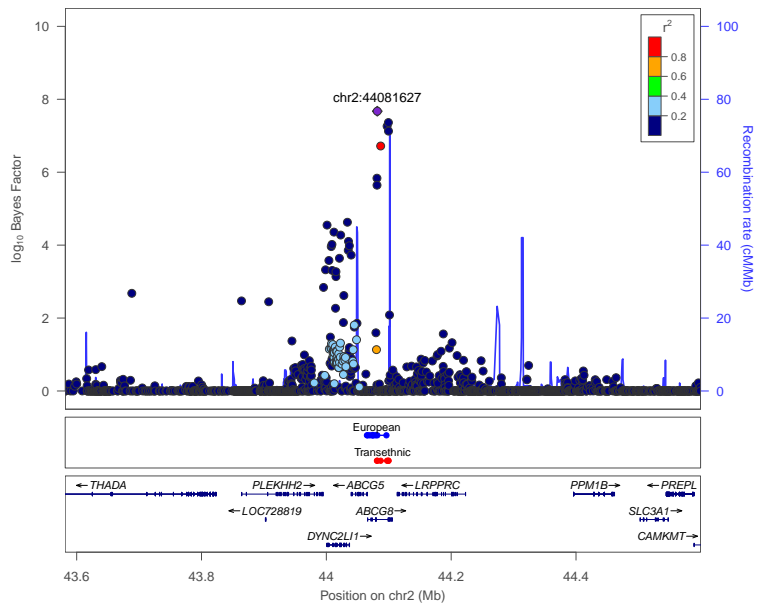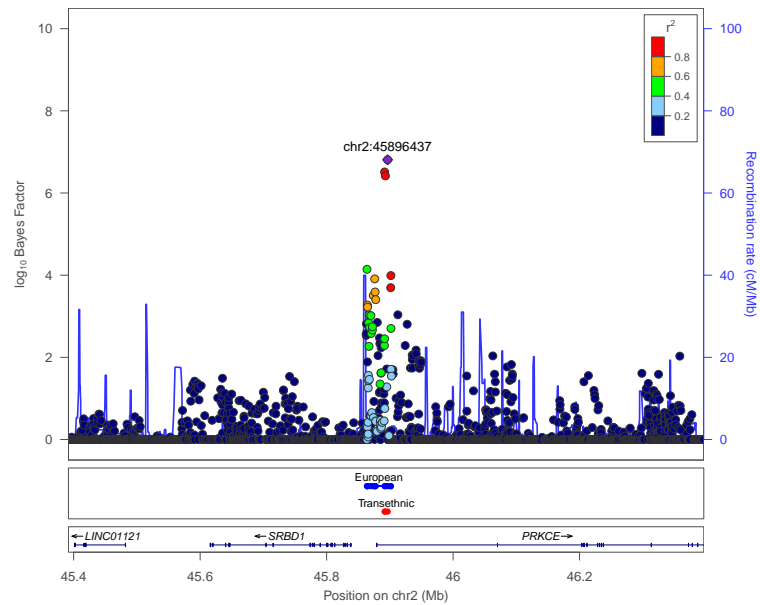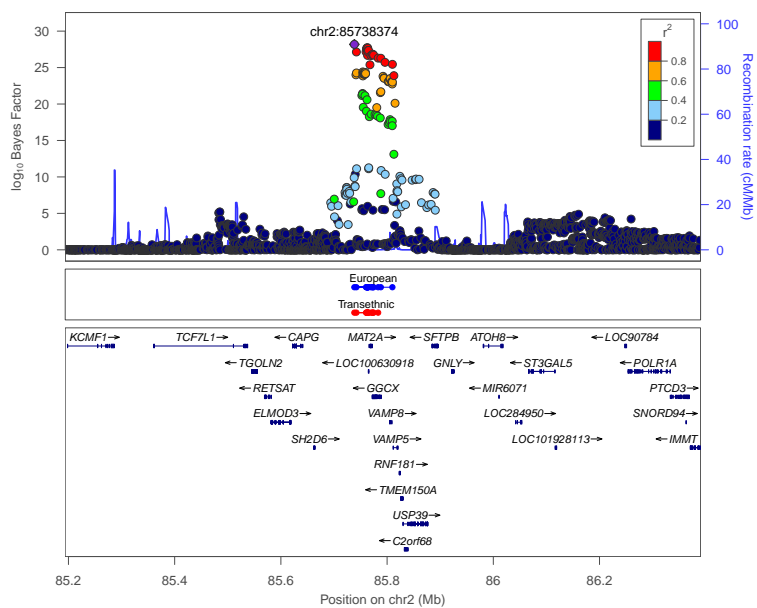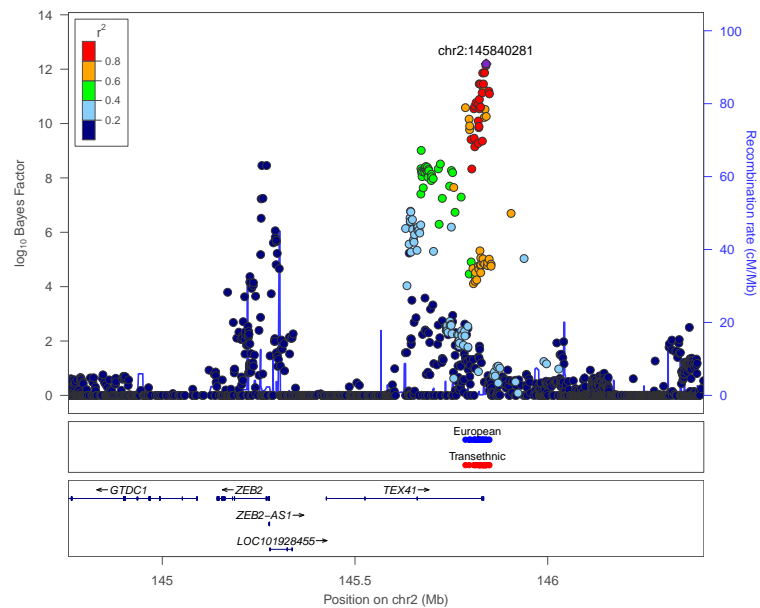

European: 99% credible set derived from European meta analysis  
 Transethnic: 99% credible set derived from transethnic meta analysis

## 4. Previously reported 133 loci in Meta analysis

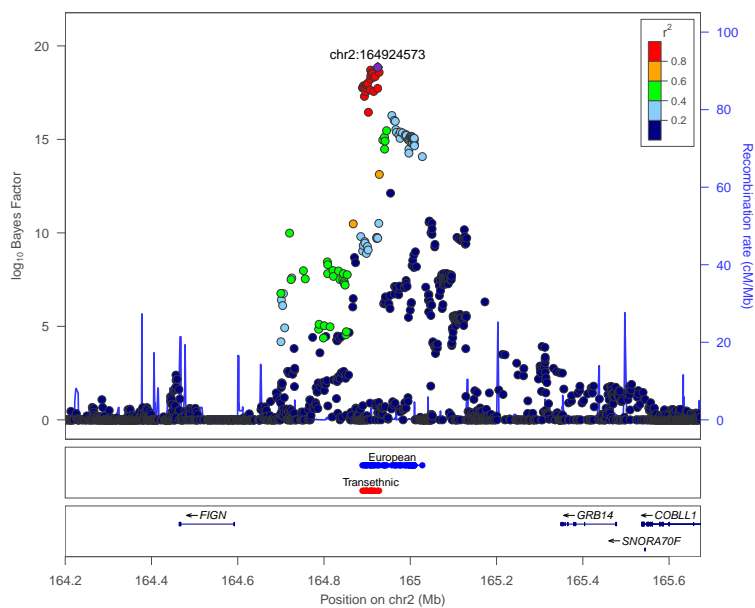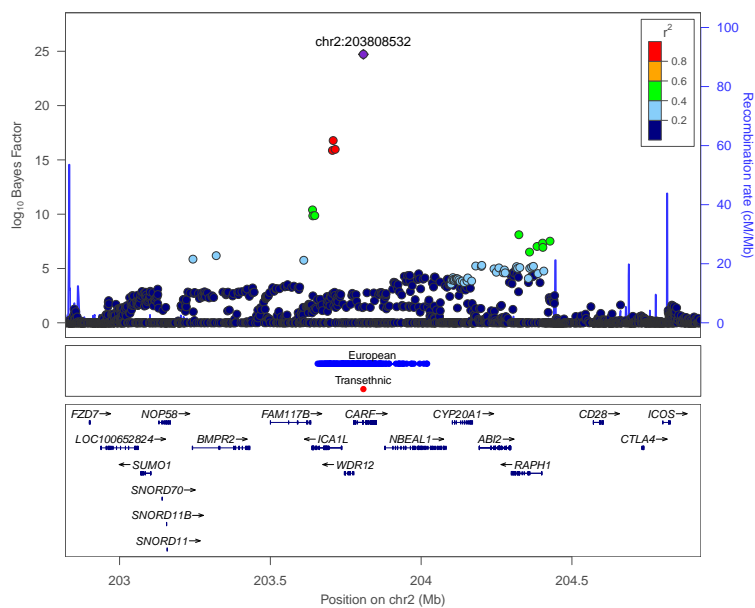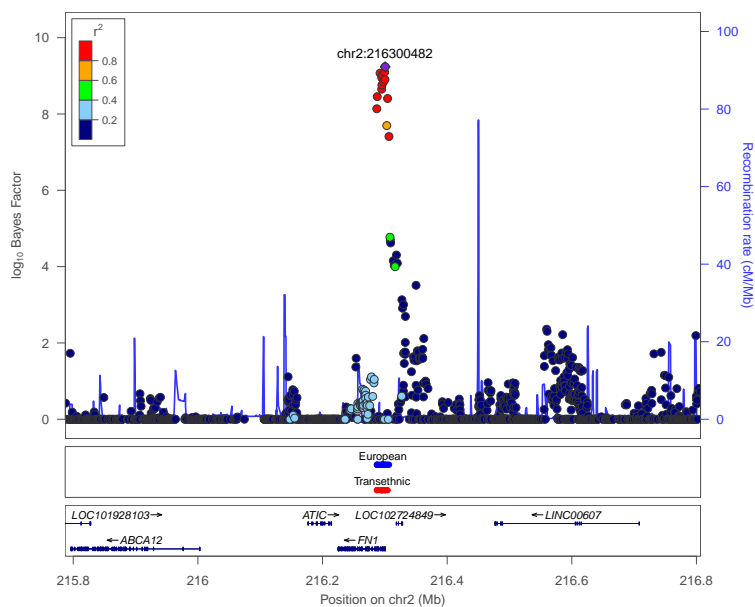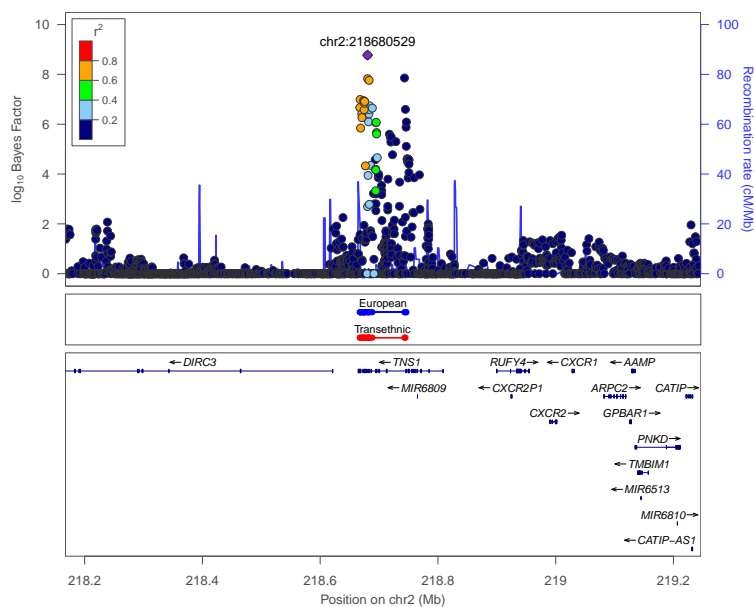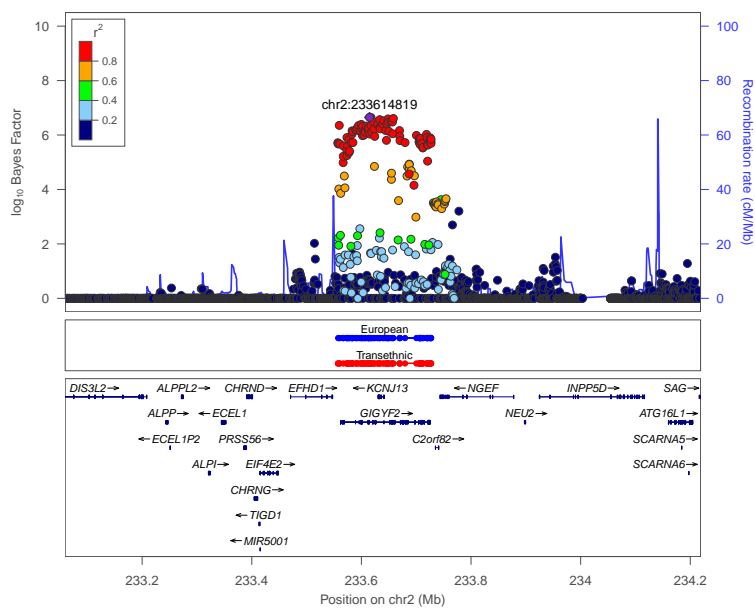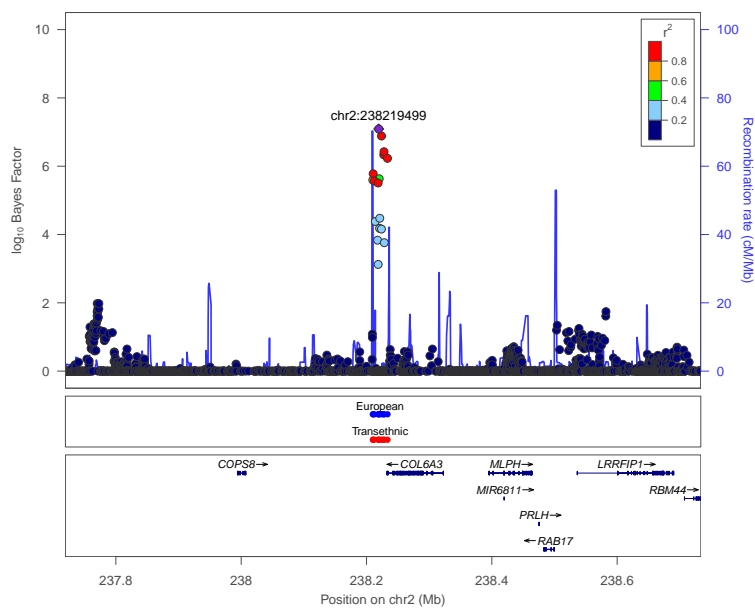

European: 99% credible set derived from European meta analysis

Transethnic: 99% credible set derived from transethnic meta analysis

## 4. Previously reported 133 loci in Meta analysis

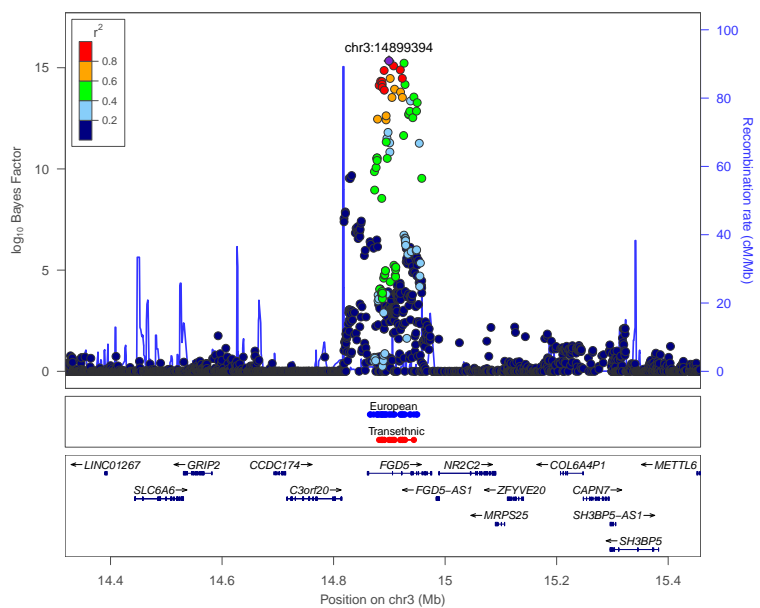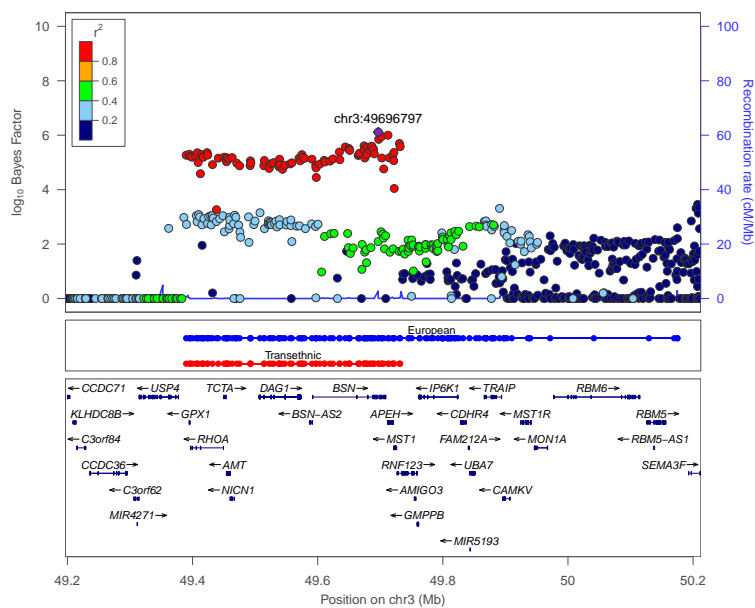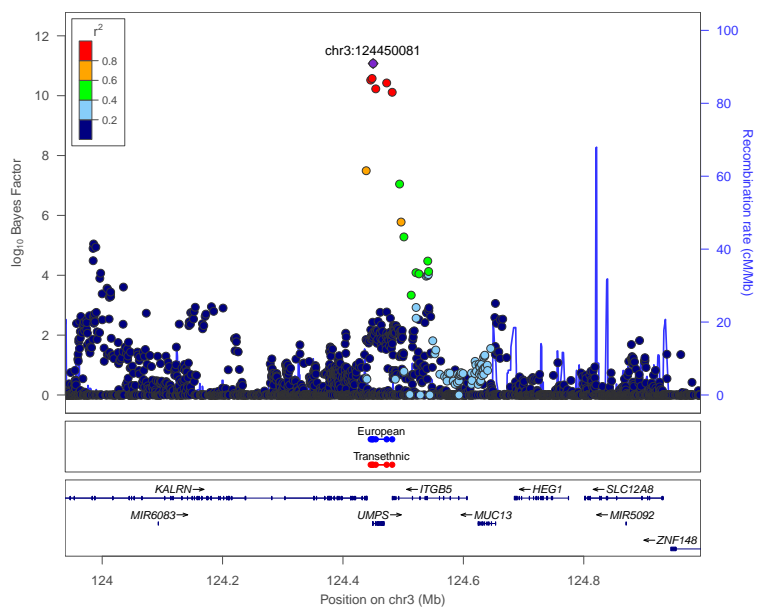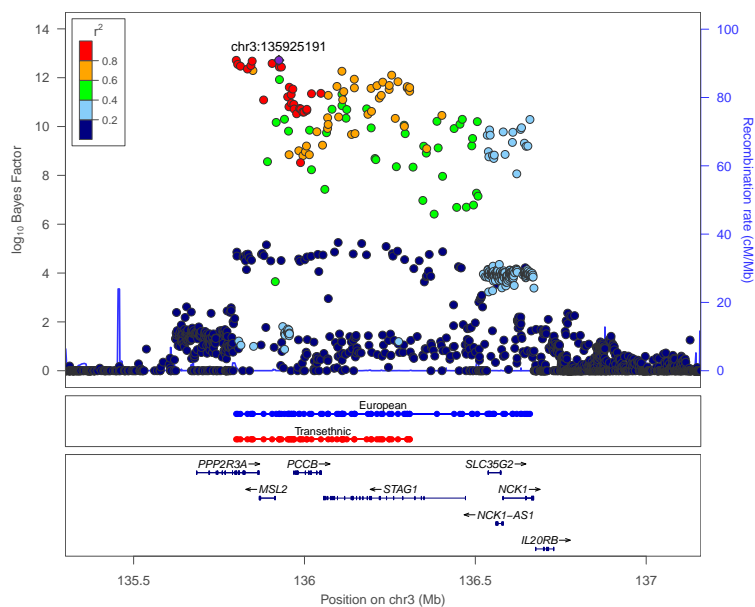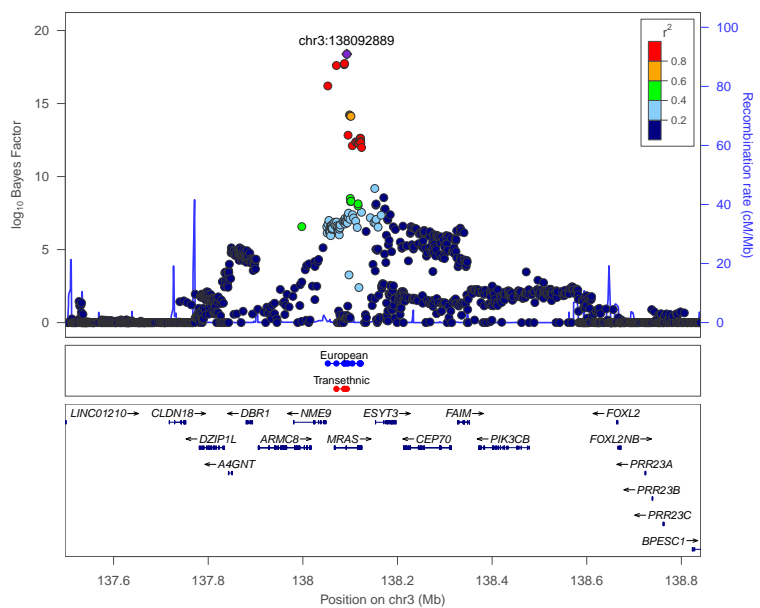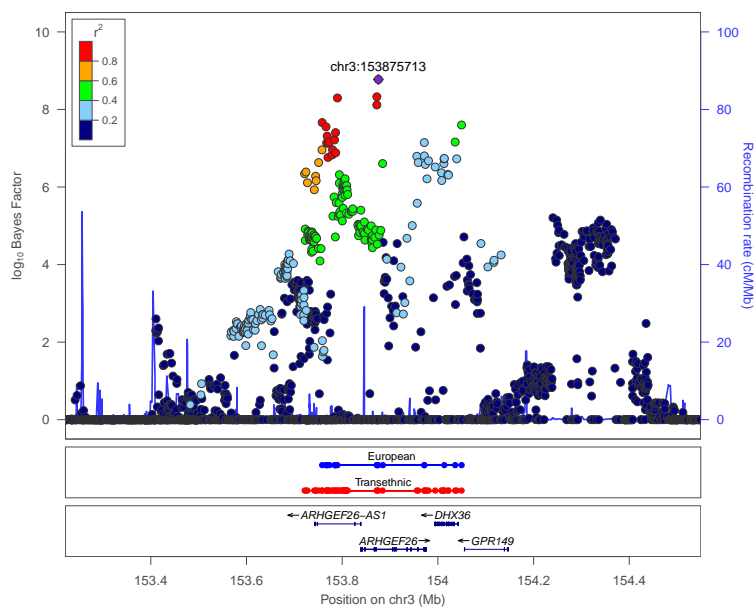

European: 99% credible set derived from European meta analysis

Transethnic: 99% credible set derived from transethnic meta analysis

# 4. Previously reported 133 loci in Meta analysis

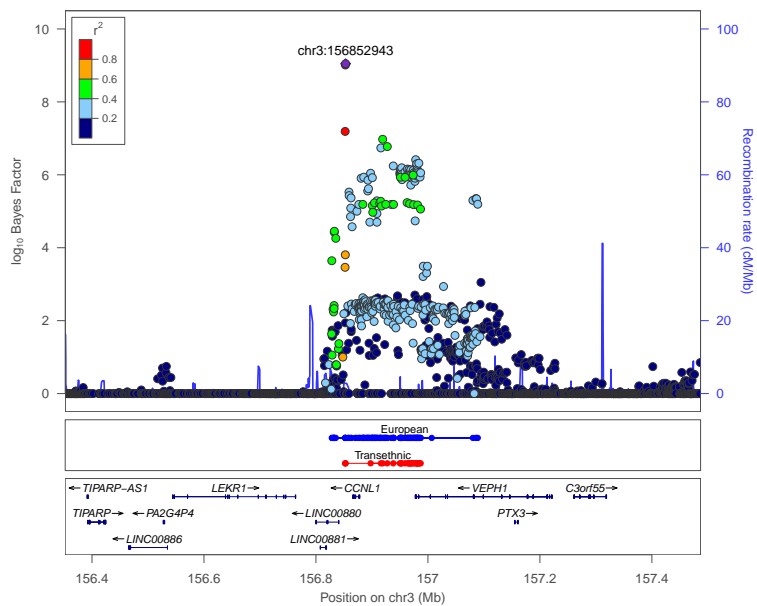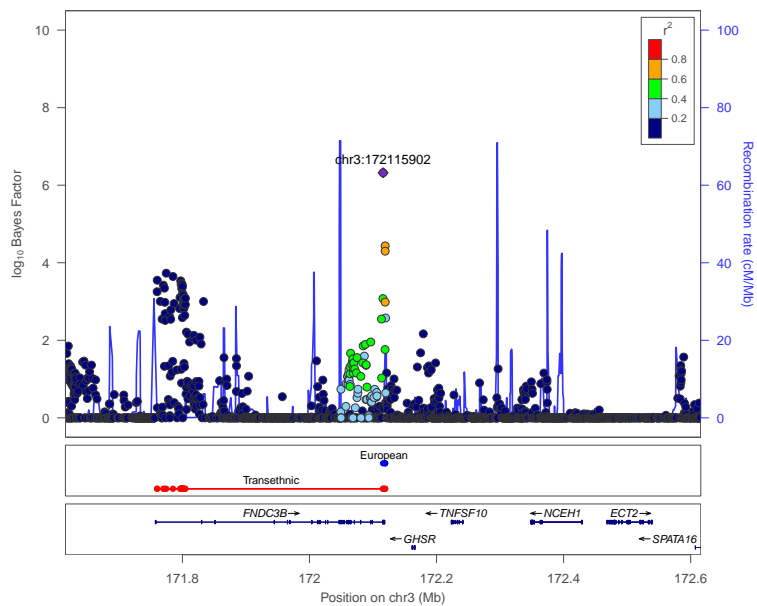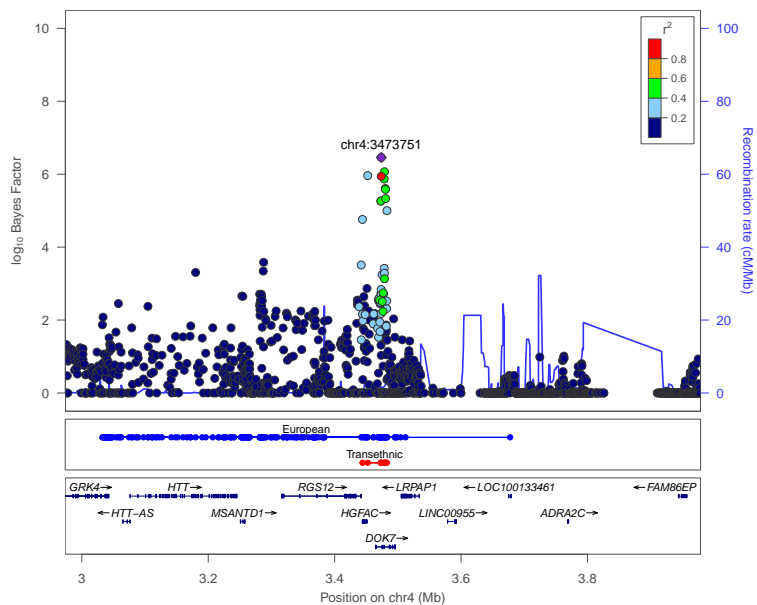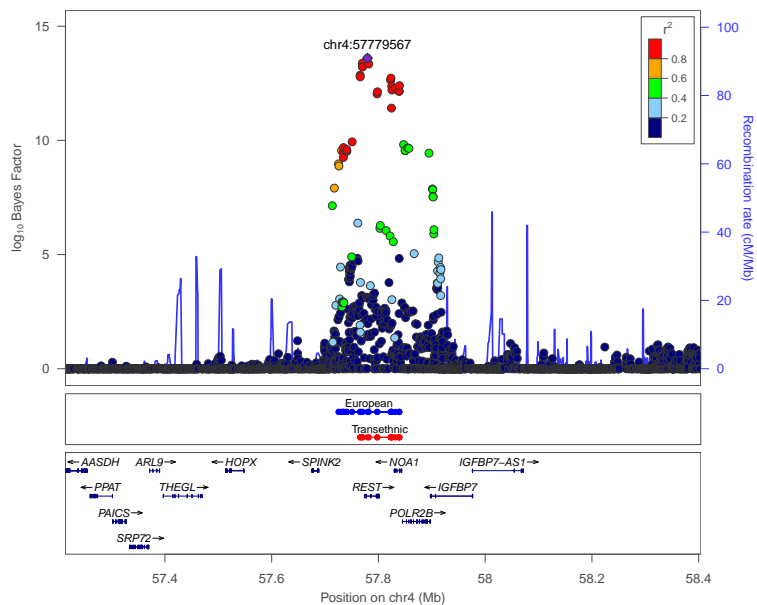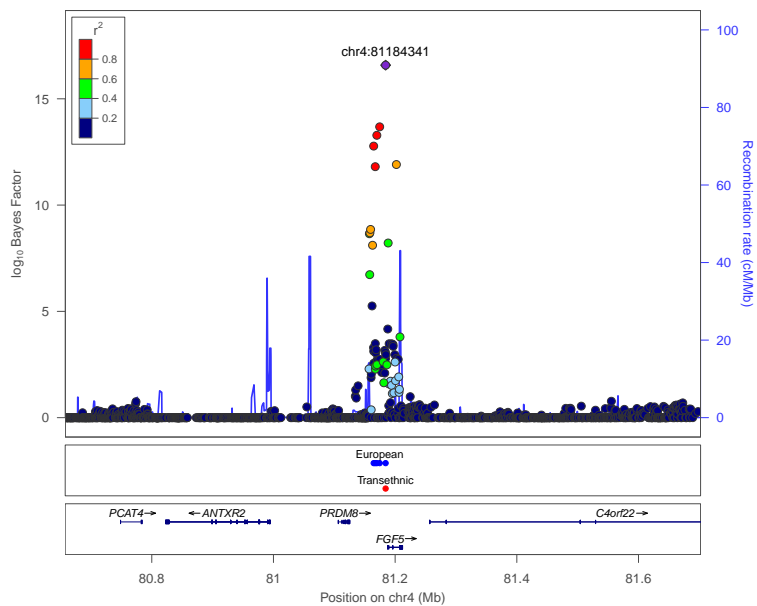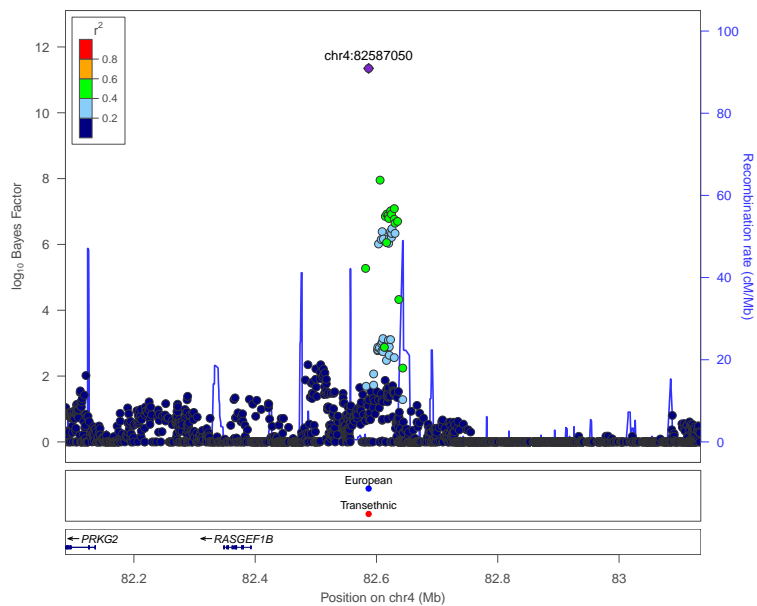

European: 99% credible set derived from European meta analysis  
 Transethnic: 99% credible set derived from transethnic meta analysis



# 4. Previously reported 133 loci in Meta analysis

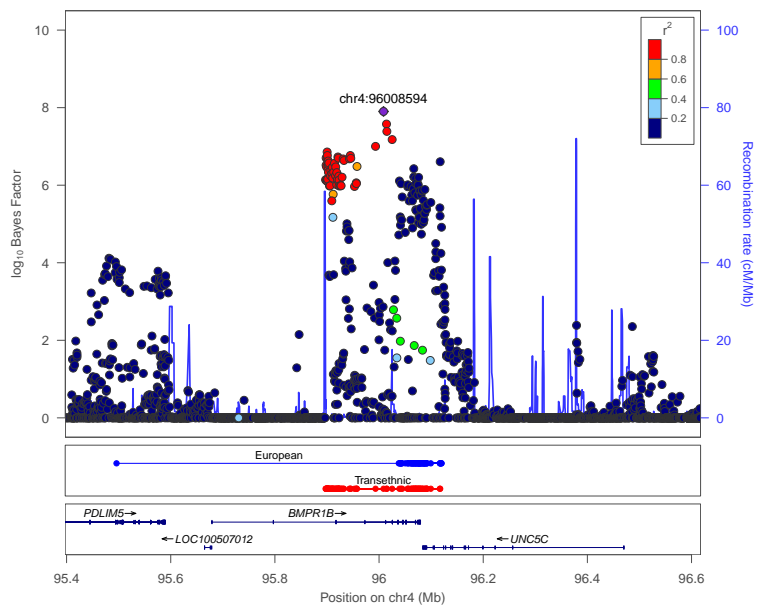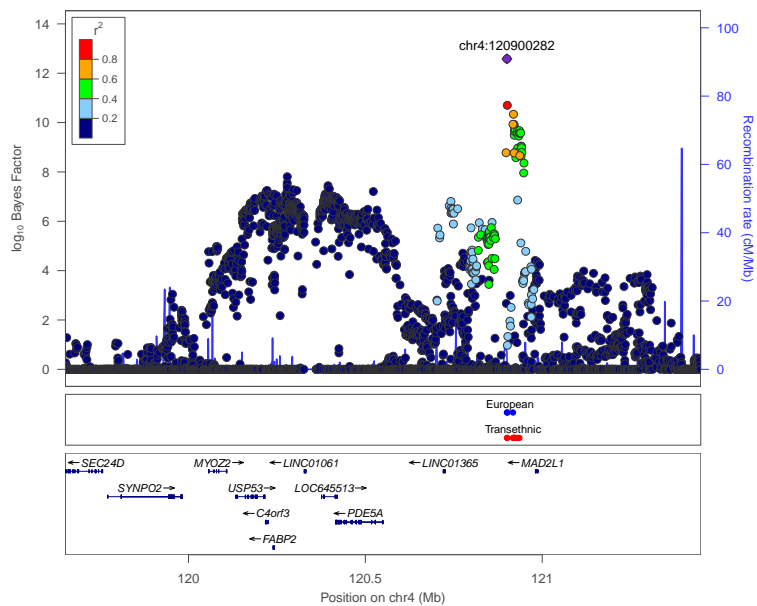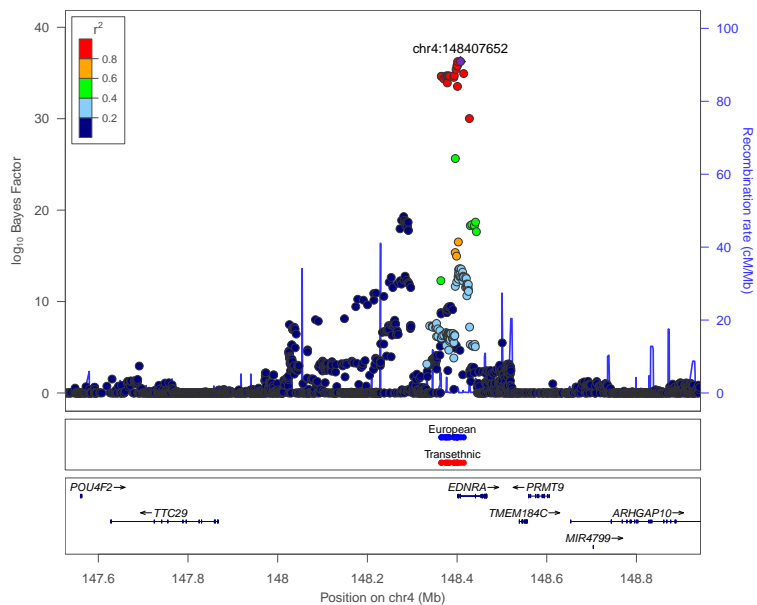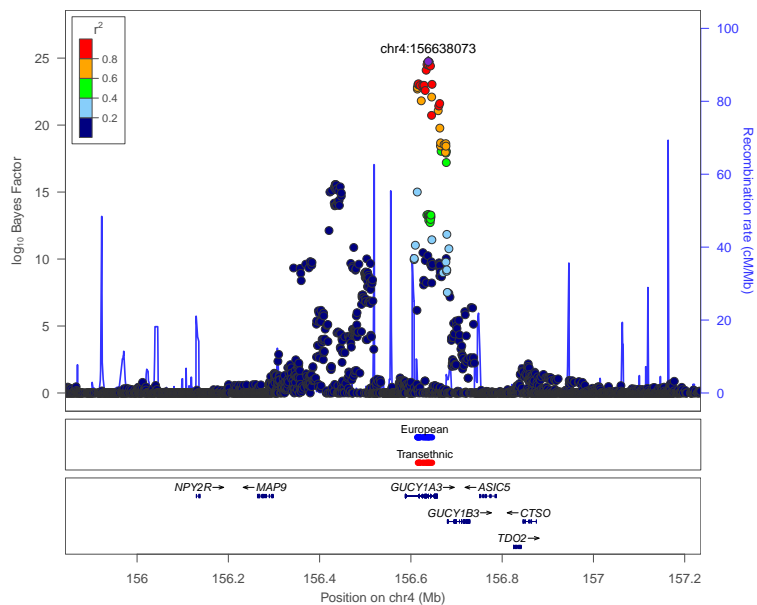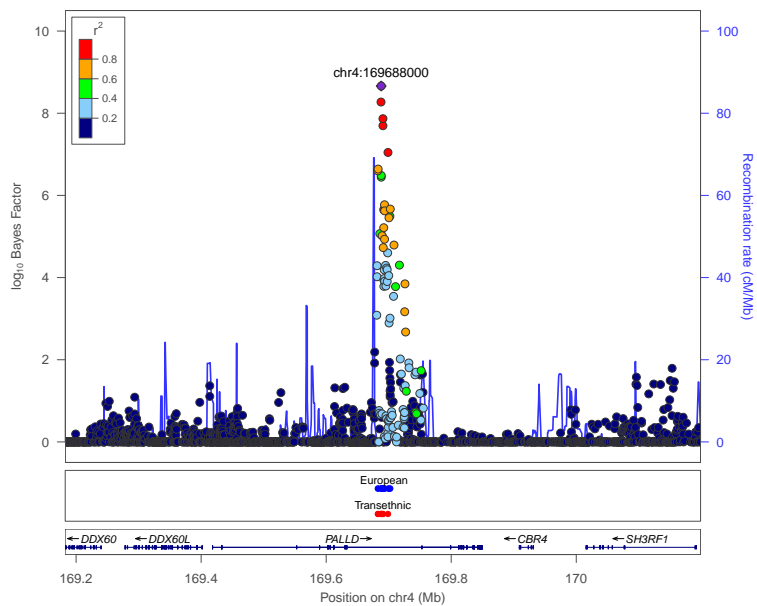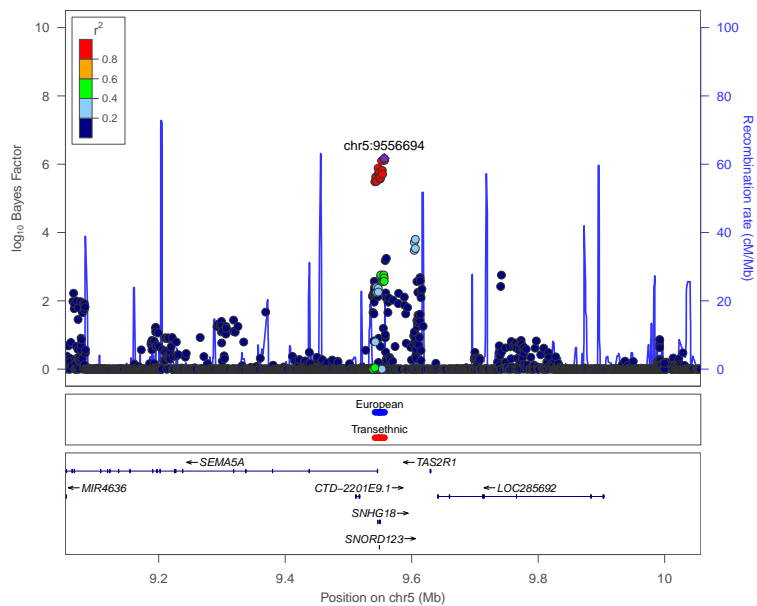

European: 99% credible set derived from European meta analysis  
 Transethnic: 99% credible set derived from transethnic meta analysis



# 4. Previously reported 133 loci in Meta analysis

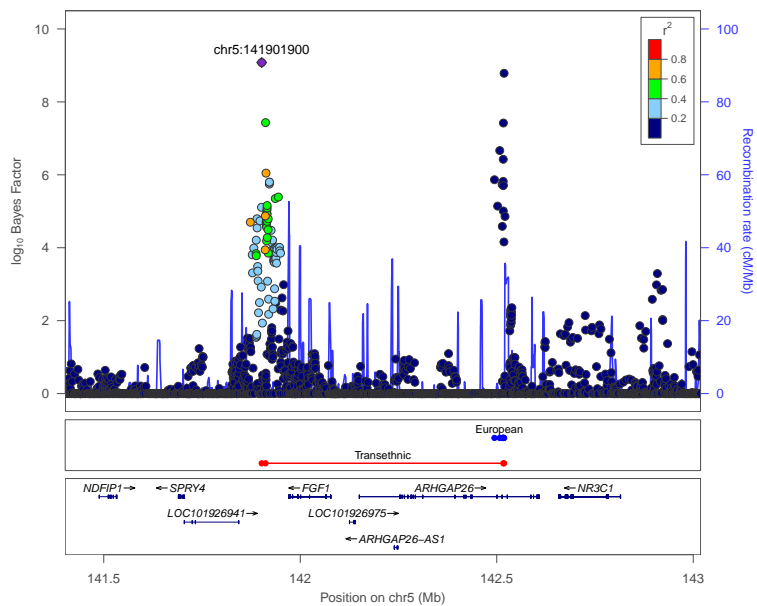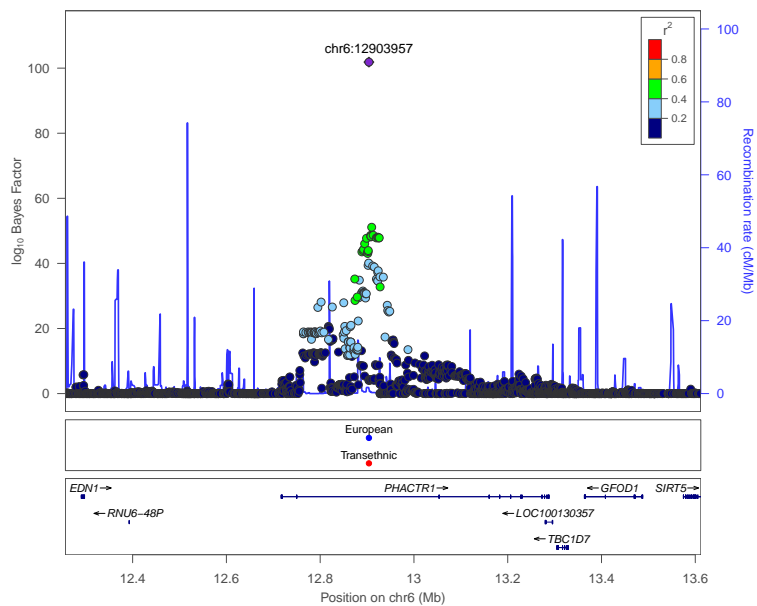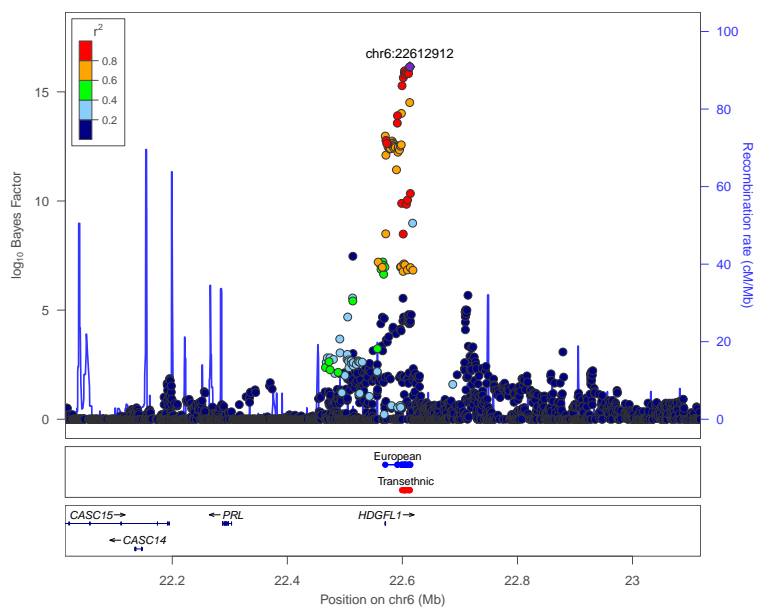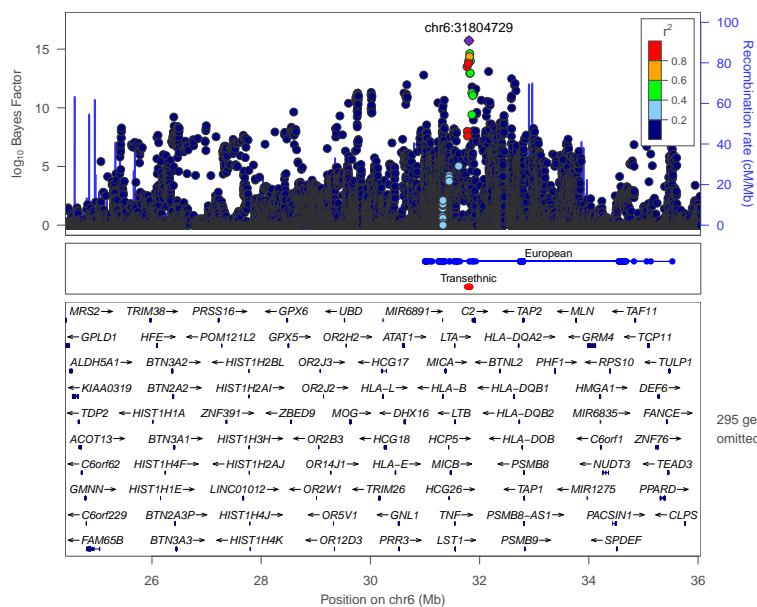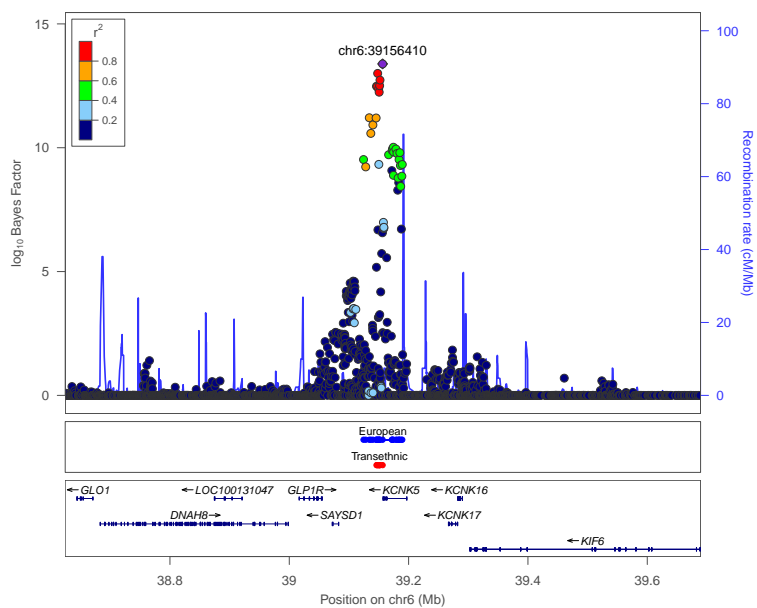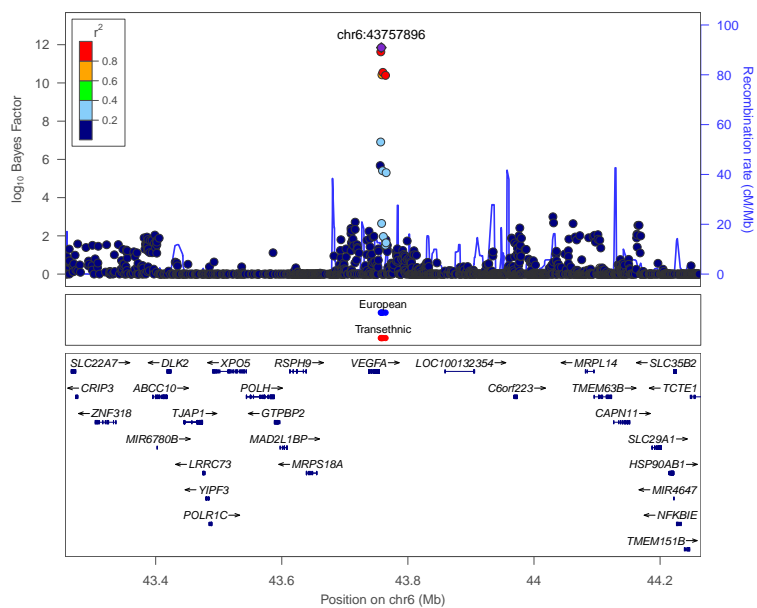

European: 99% credible set derived from European meta analysis  
 Transethnic: 99% credible set derived from transethnic meta analysis

# 4. Previously reported 133 loci in Meta analysis

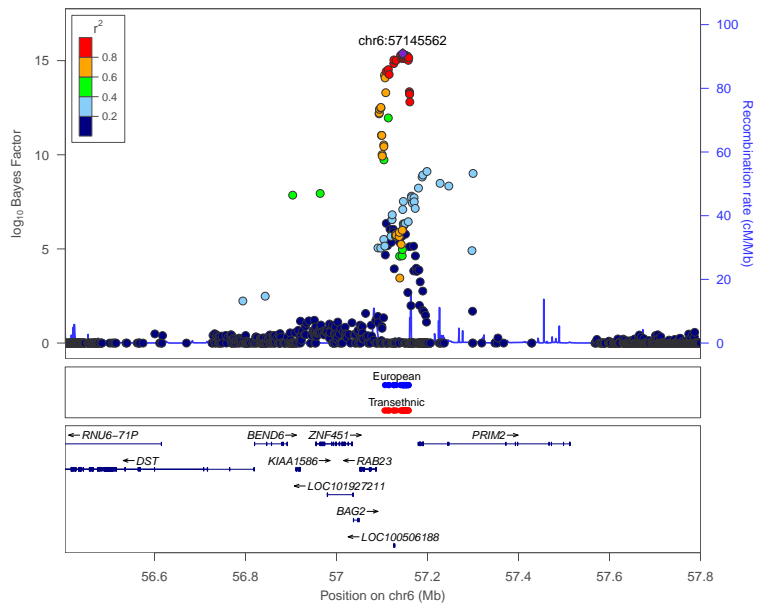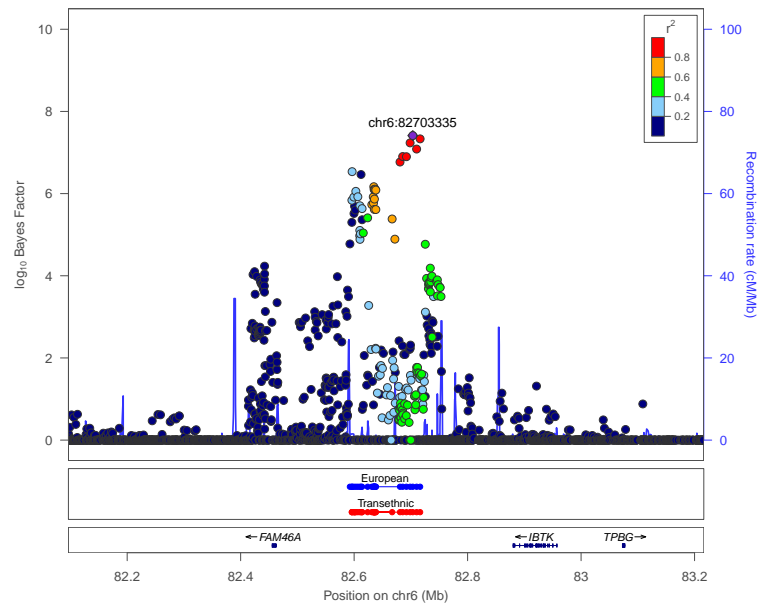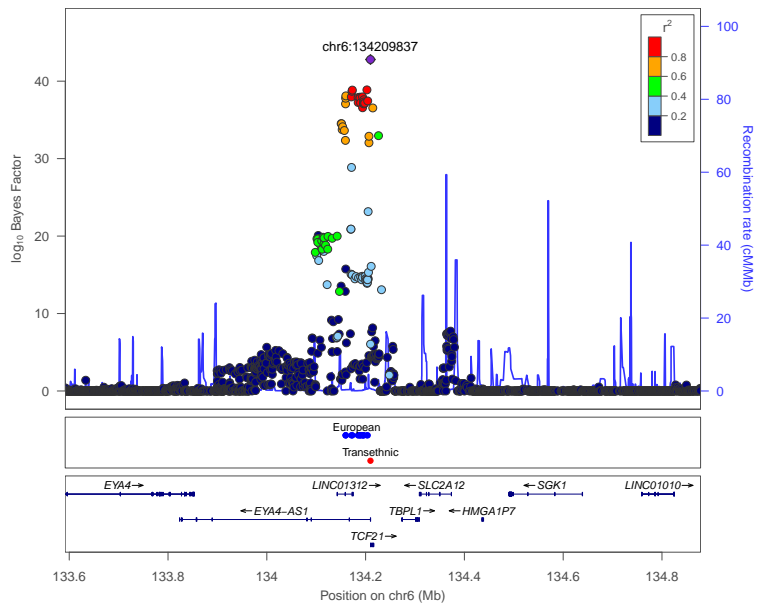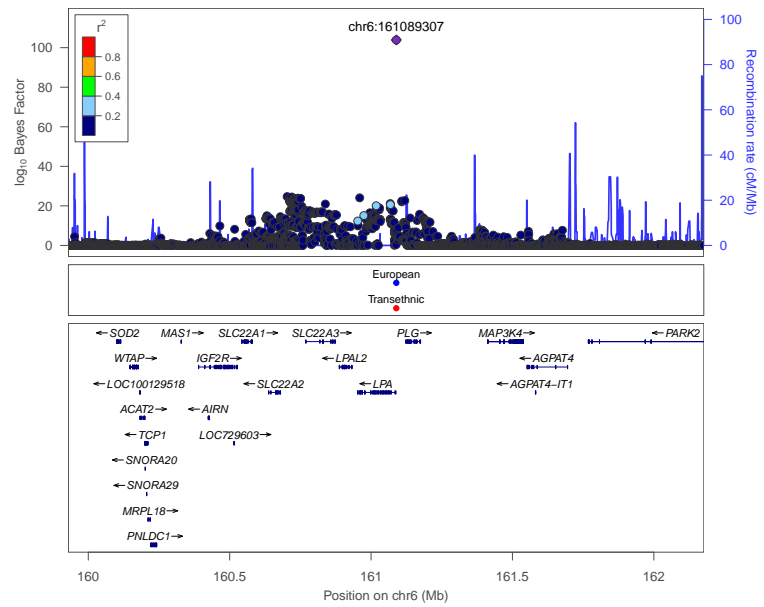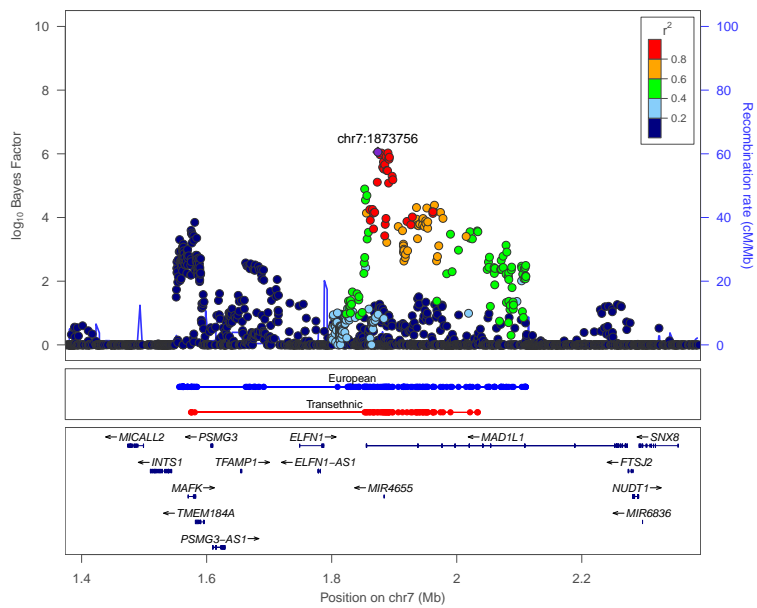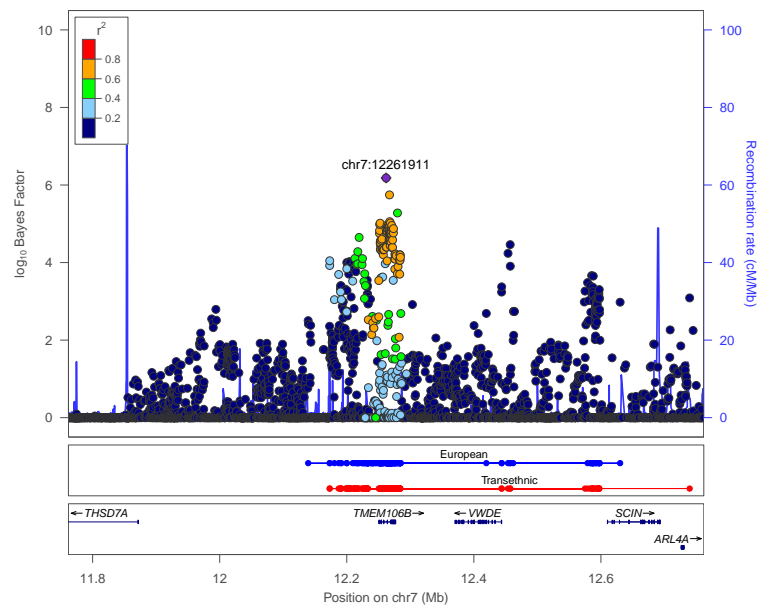

European: 99% credible set derived from European meta analysis  
 Transethnic: 99% credible set derived from transethnic meta analysis

## 4. Previously reported 133 loci in Meta analysis

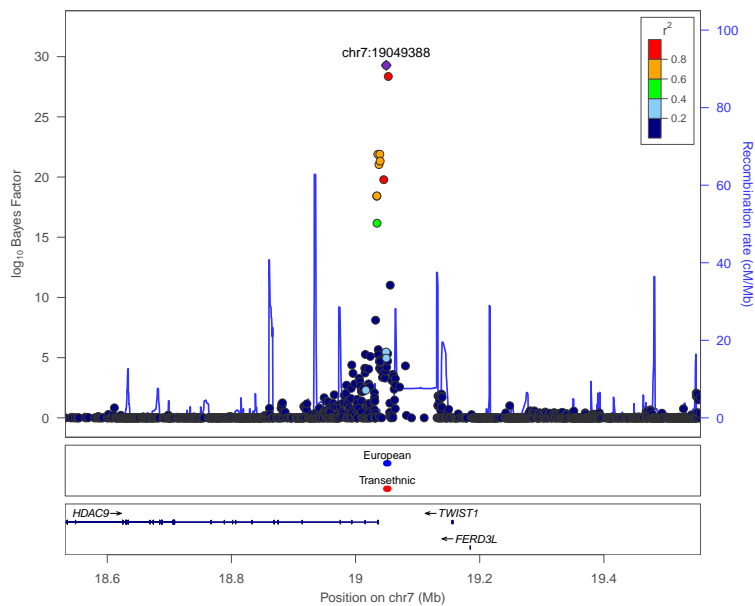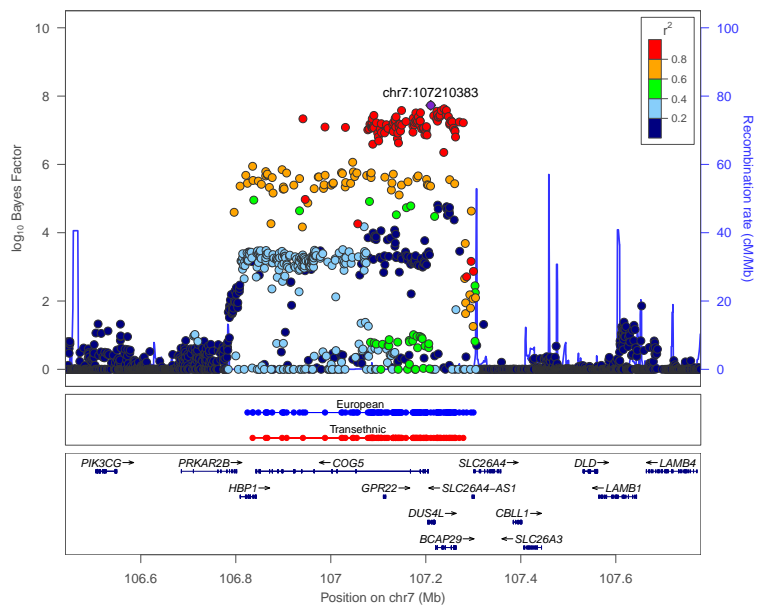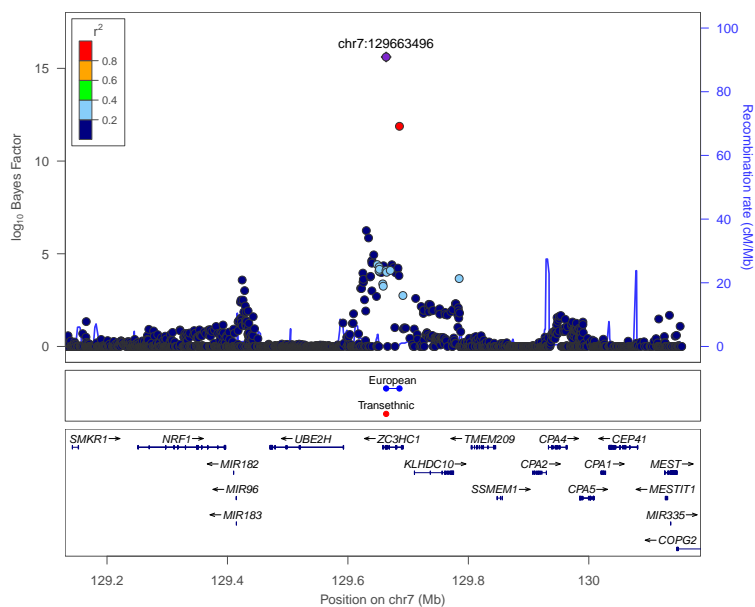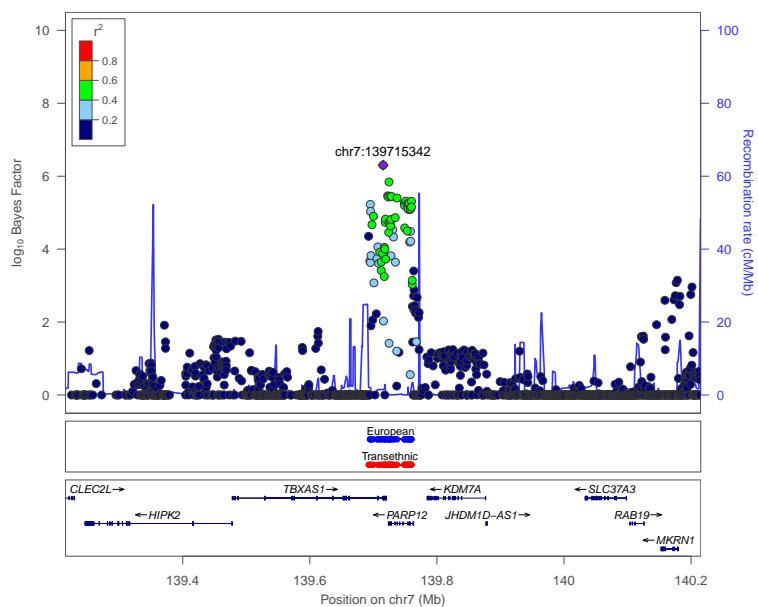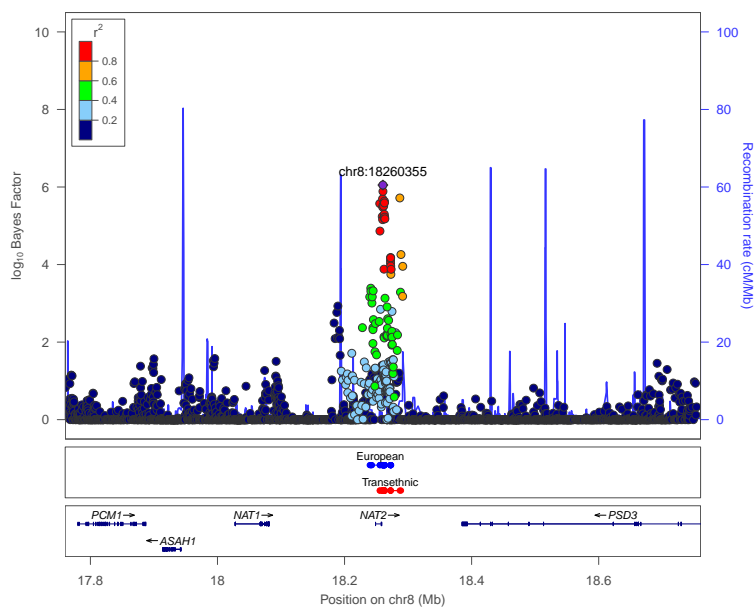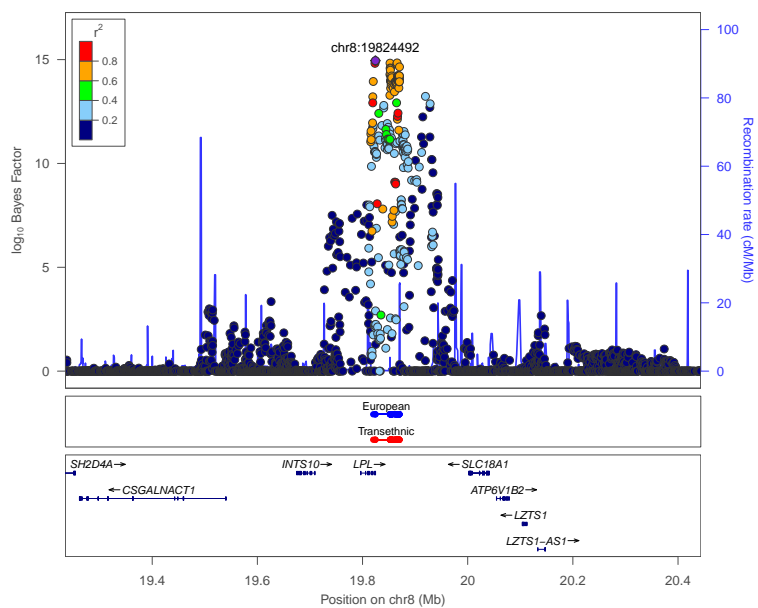

European: 99% credible set derived from European meta analysis

Transethnic: 99% credible set derived from transethnic meta analysis

# 4. Previously reported 133 loci in Meta analysis

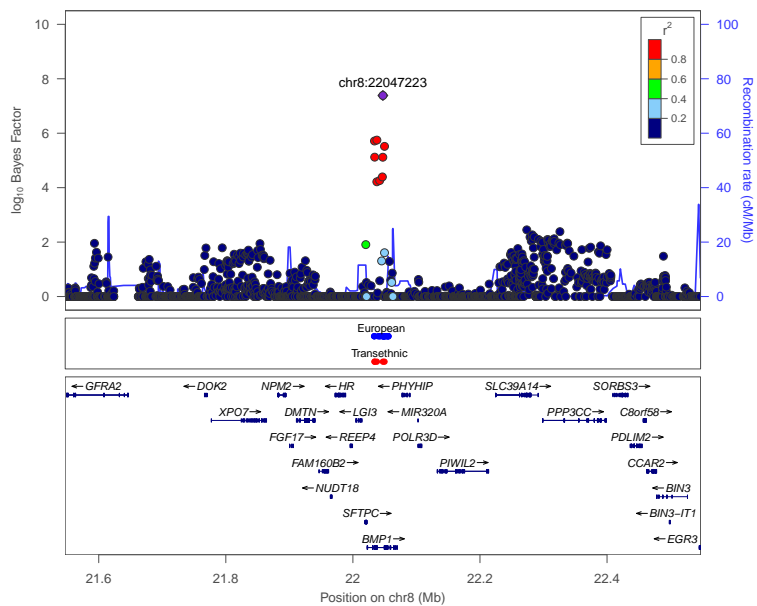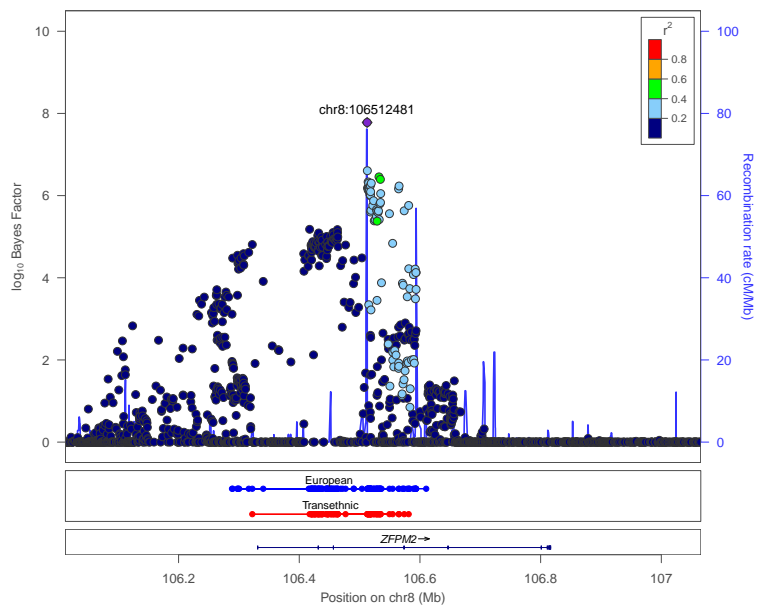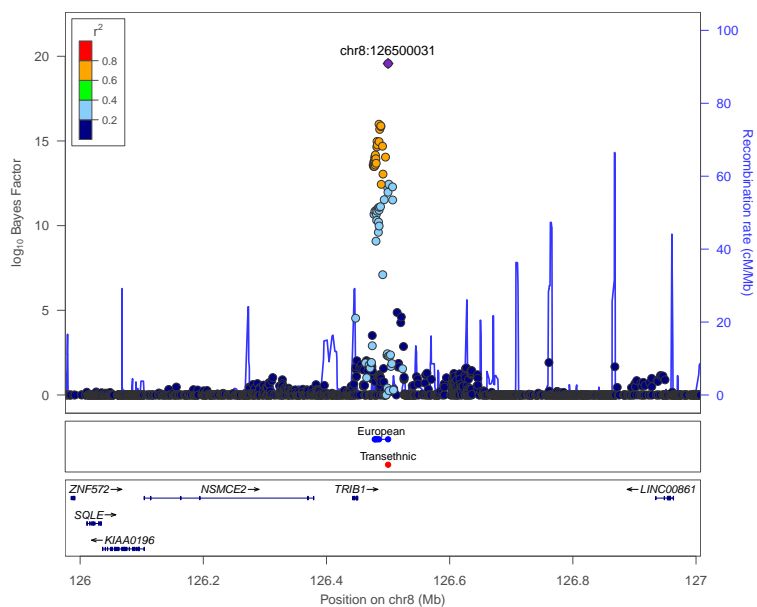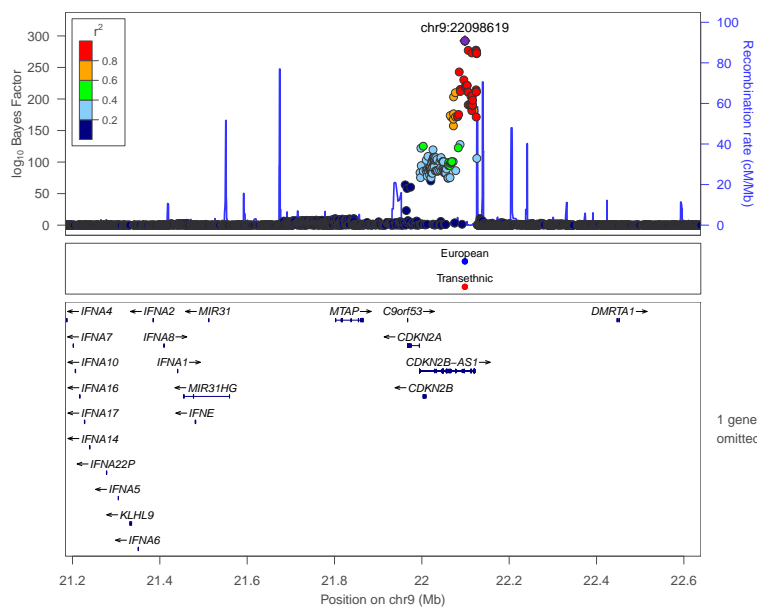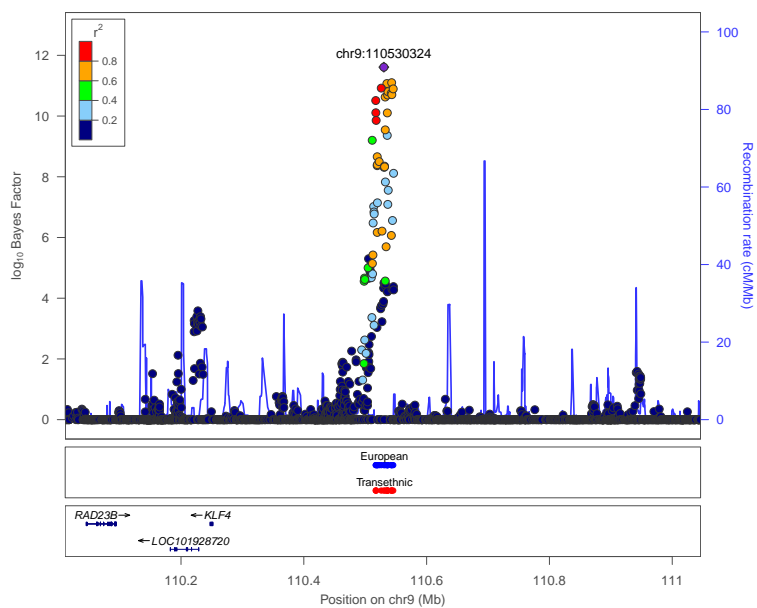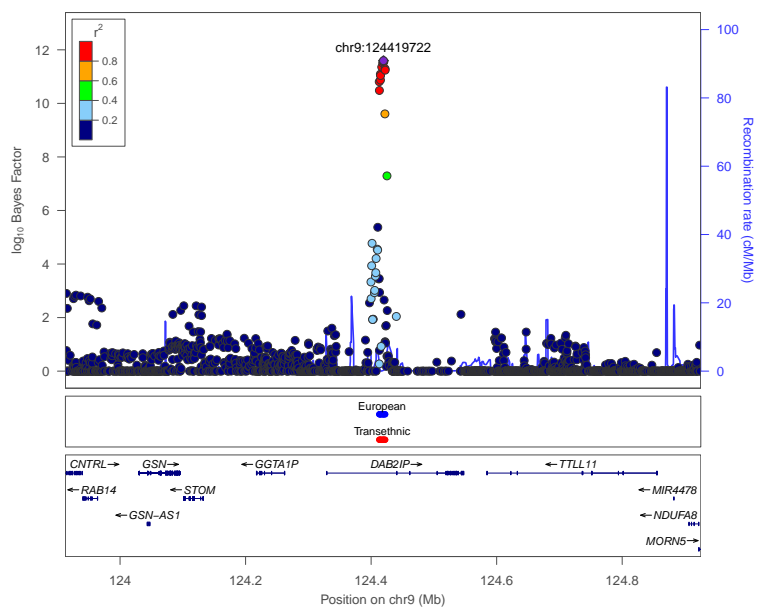

European: 99% credible set derived from European meta analysis  
 Transethnic: 99% credible set derived from transethnic meta analysis

# 4. Previously reported 133 loci in Meta analysis

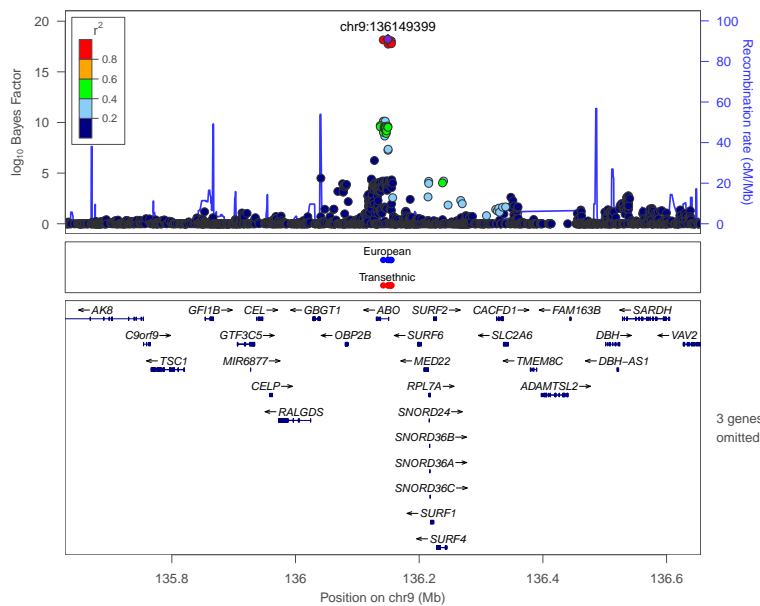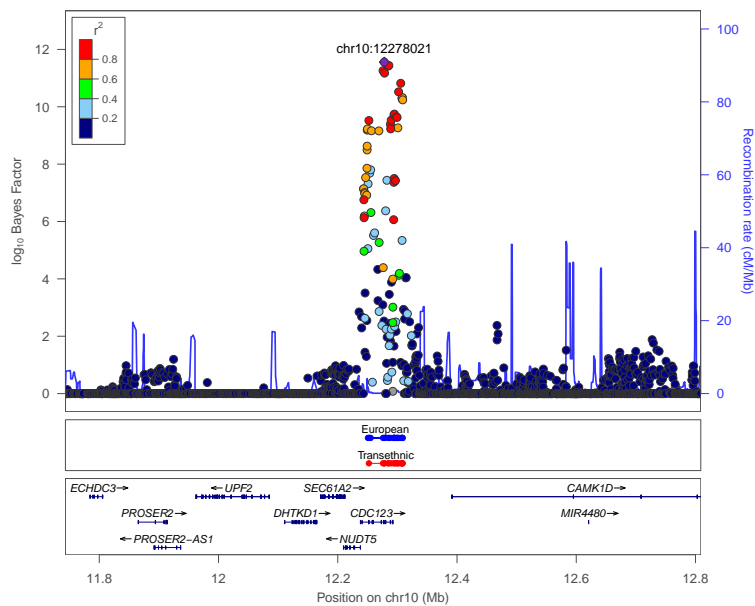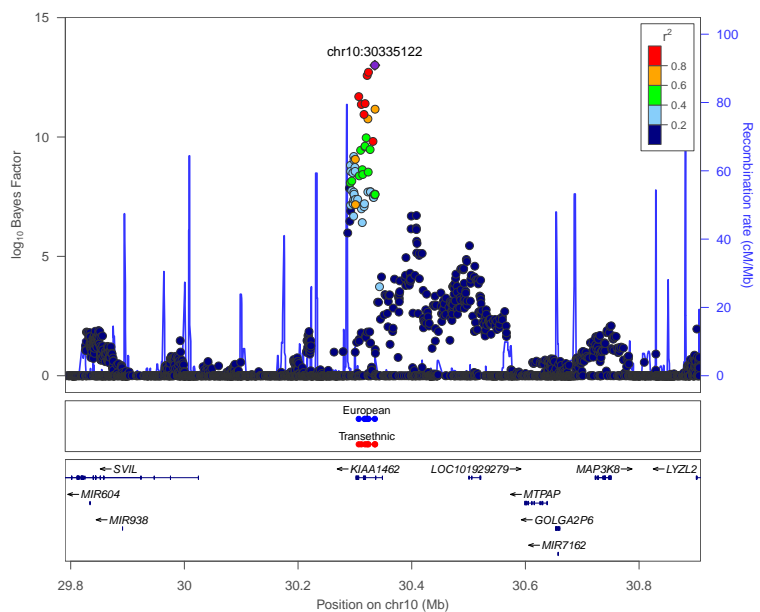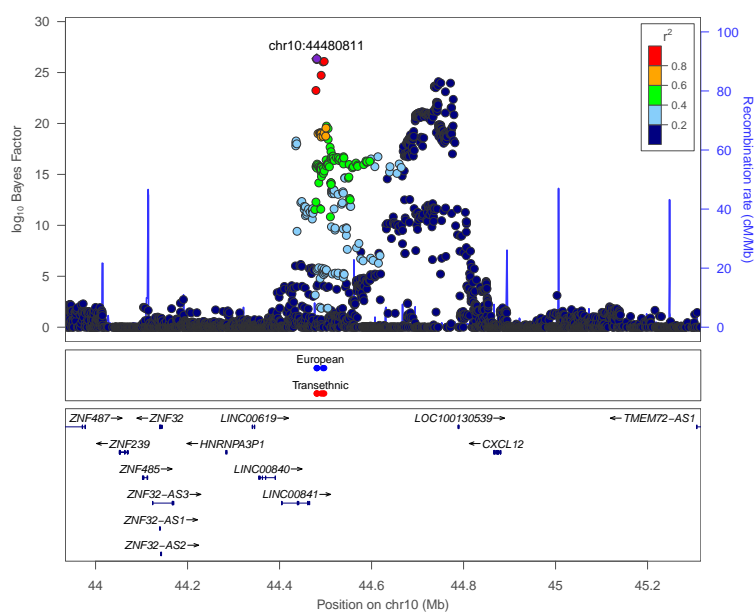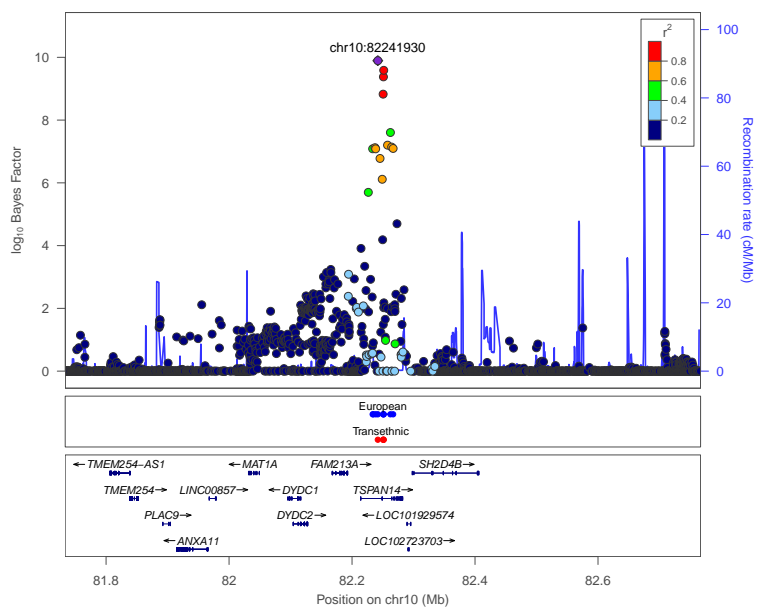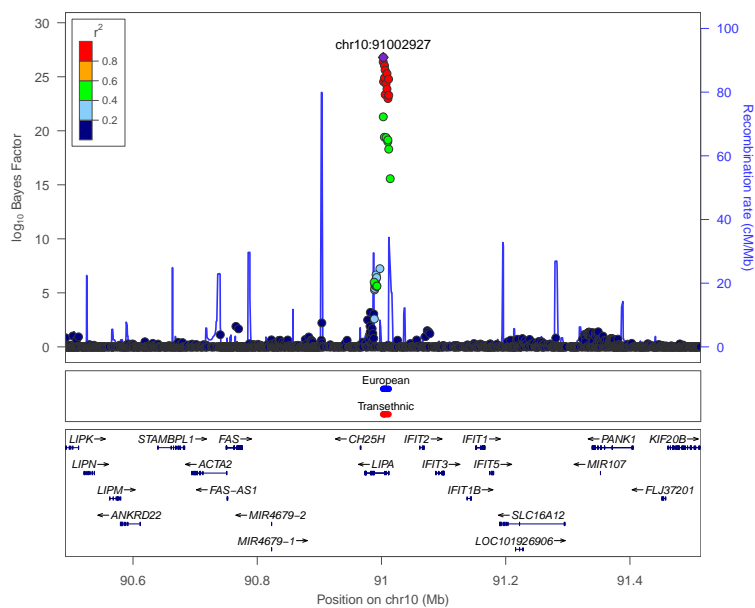

European: 99% credible set derived from European meta analysis  
 Transethnic: 99% credible set derived from transethnic meta analysis

## 4. Previously reported 133 loci in Meta analysis

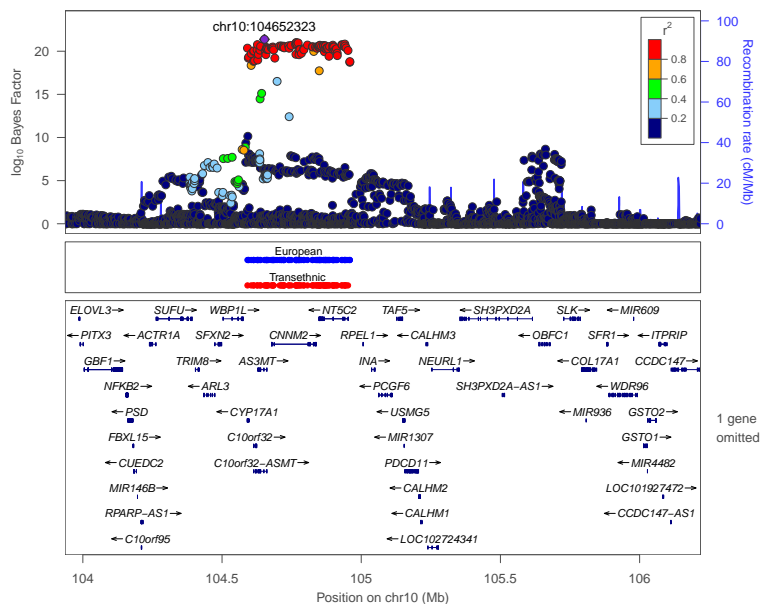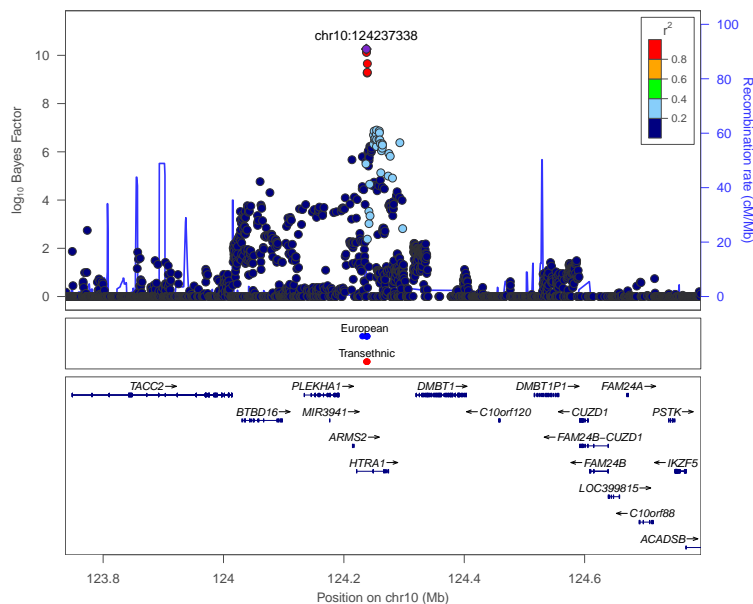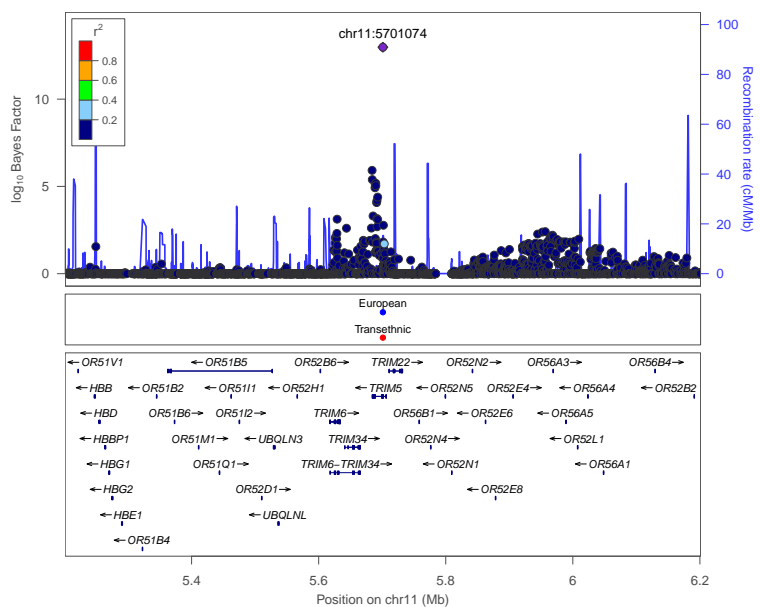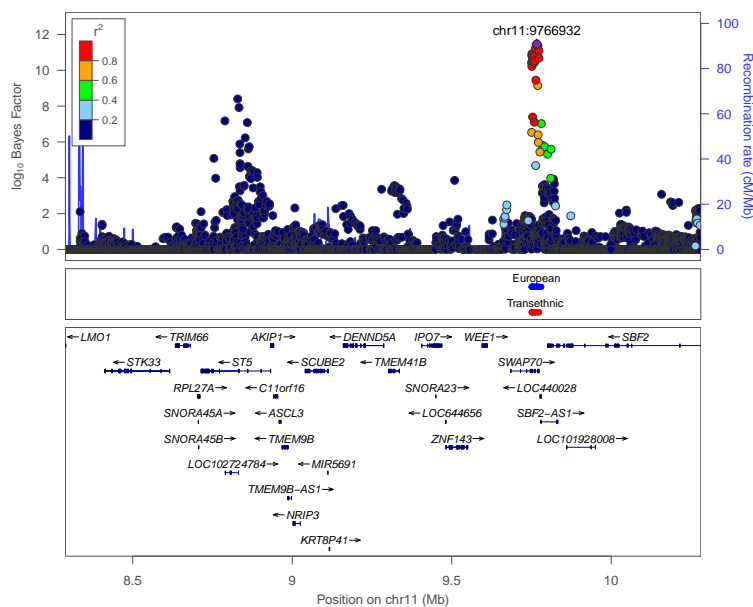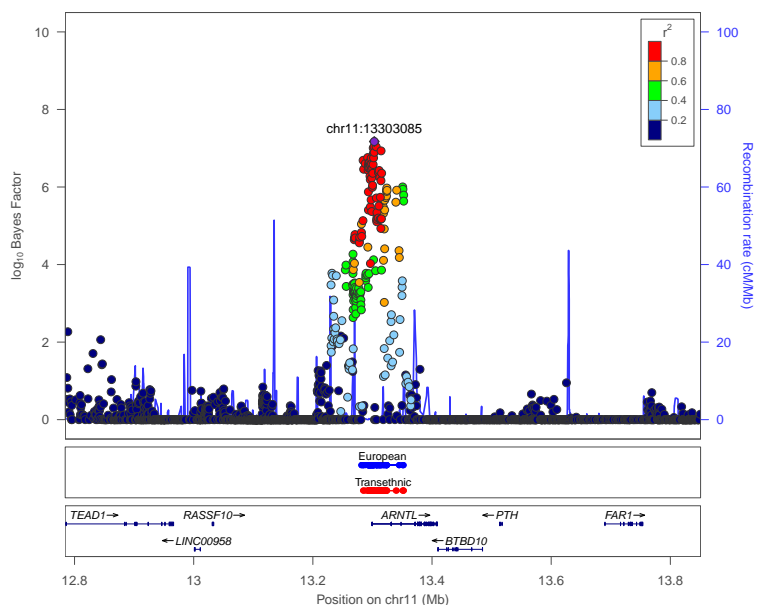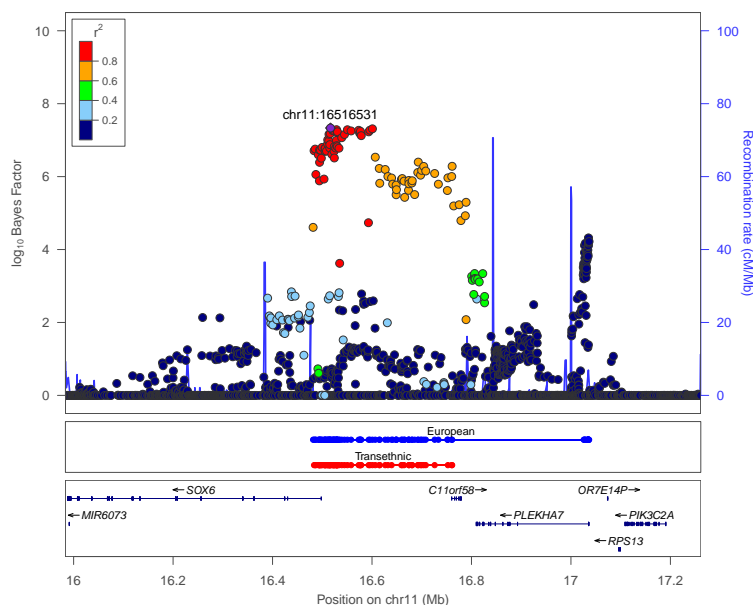

European: 99% credible set derived from European meta analysis

Transethnic: 99% credible set derived from transethnic meta analysis



# 4. Previously reported 133 loci in Meta analysis

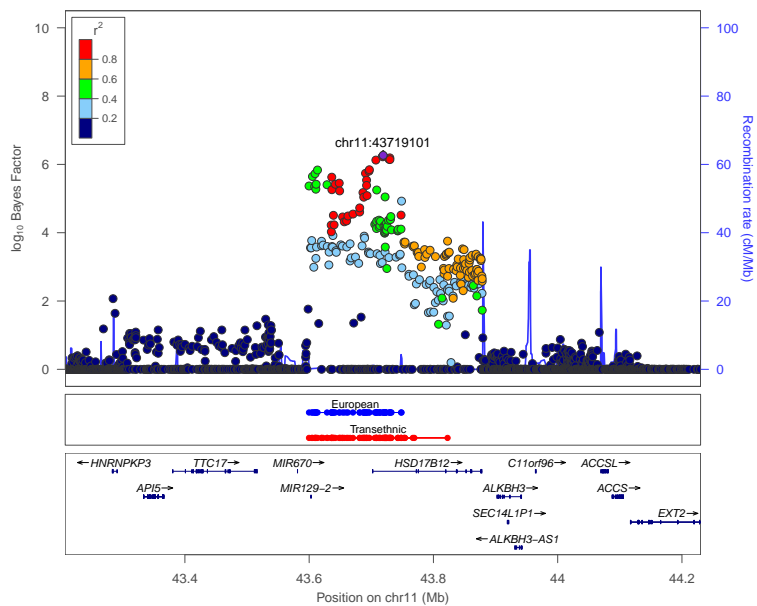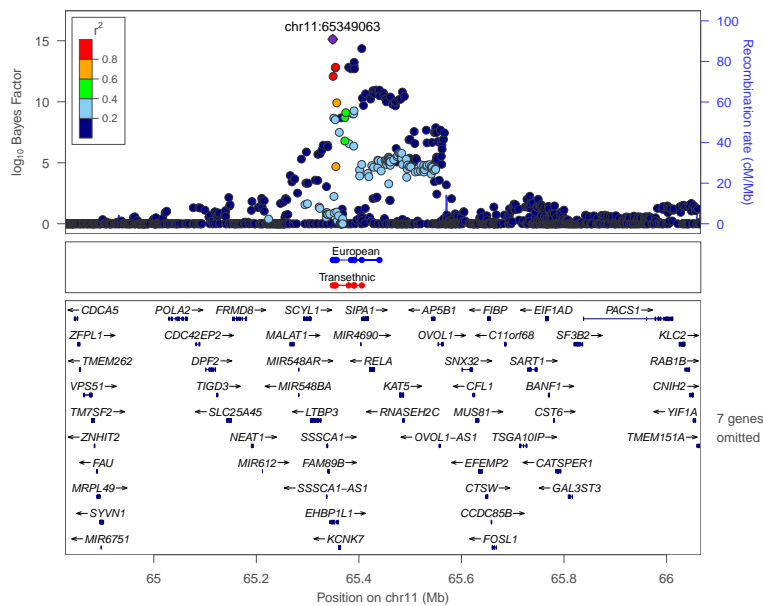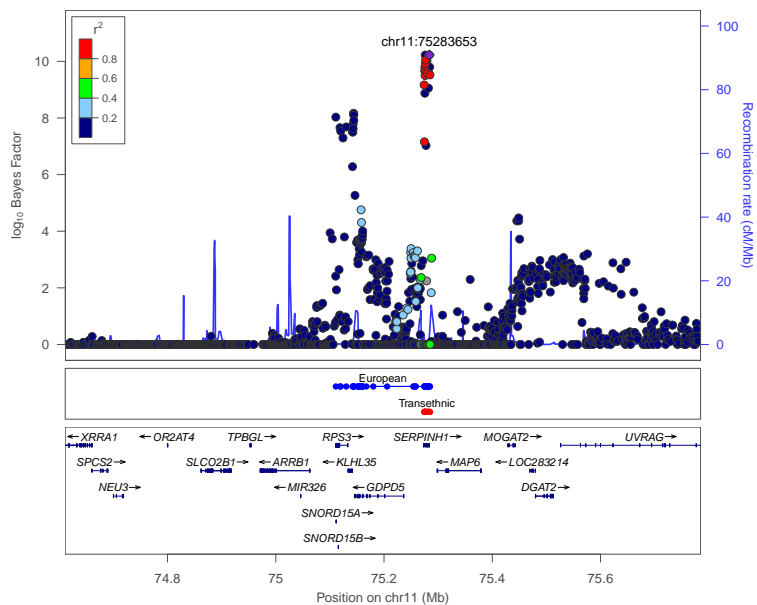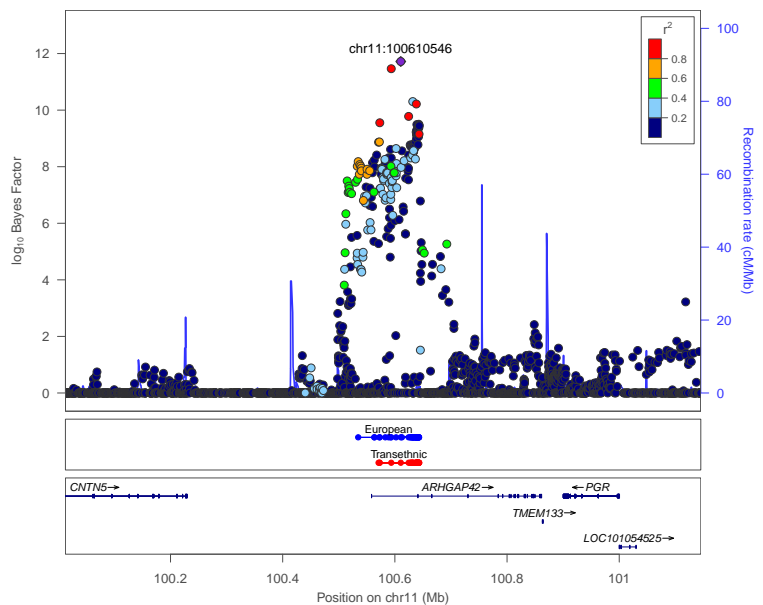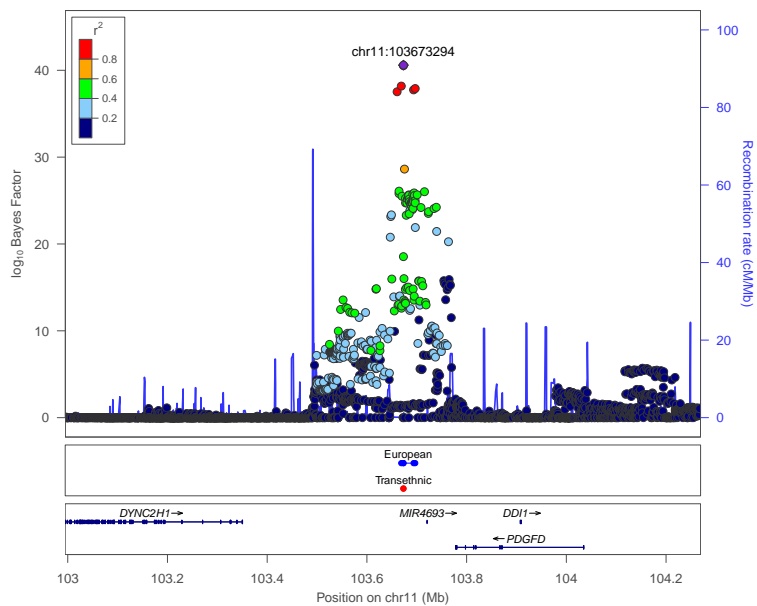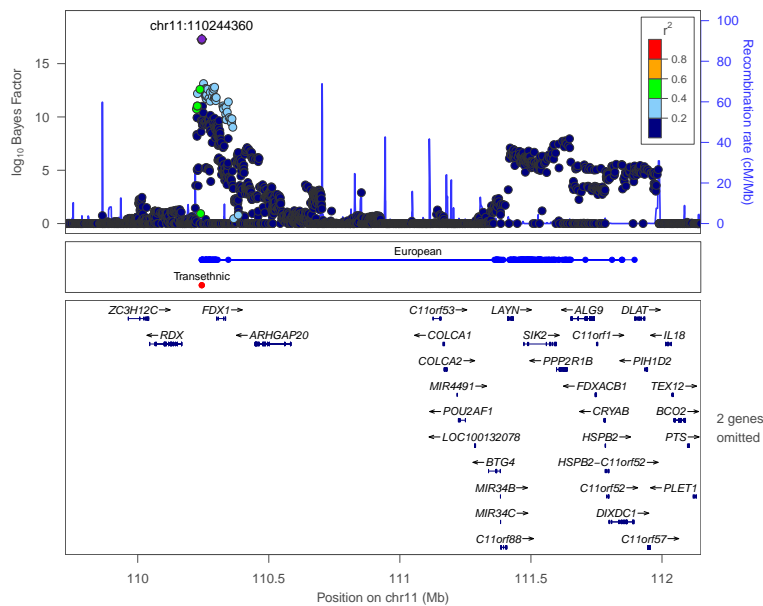

European: 99% credible set derived from European meta analysis  
 Transethnic: 99% credible set derived from transethnic meta analysis



# 4. Previously reported 133 loci in Meta analysis

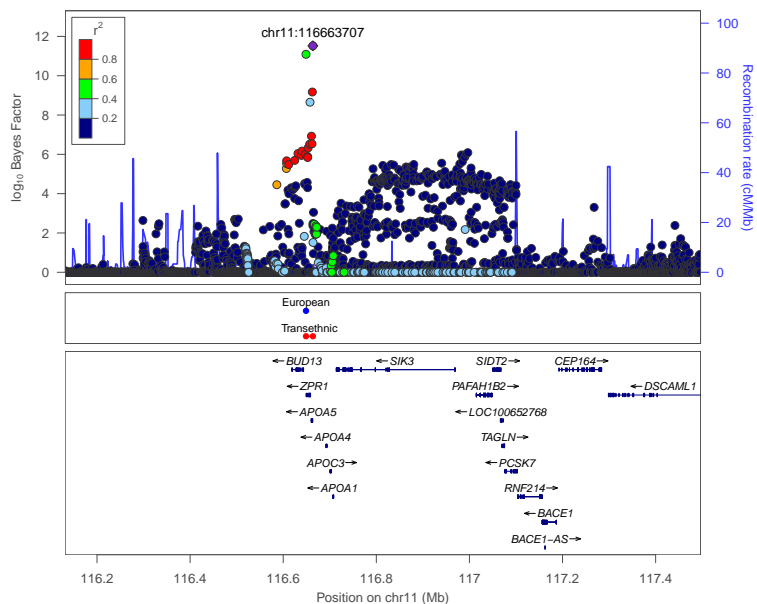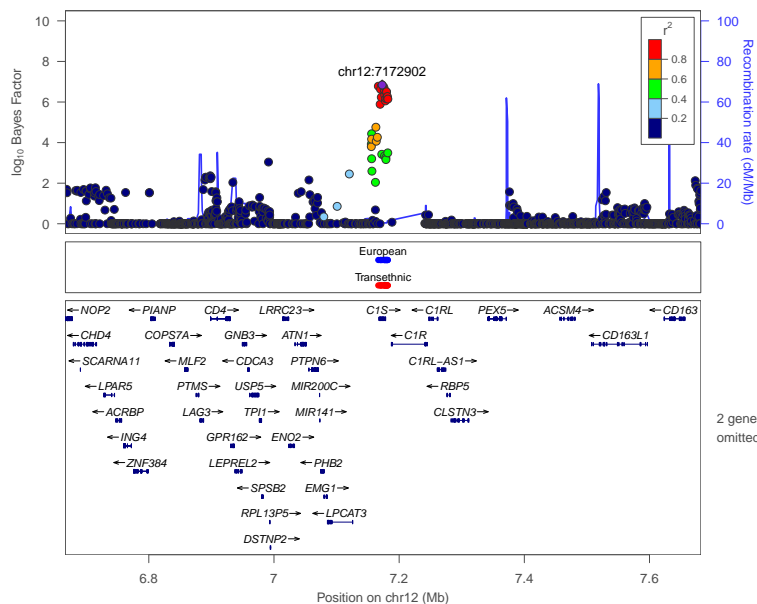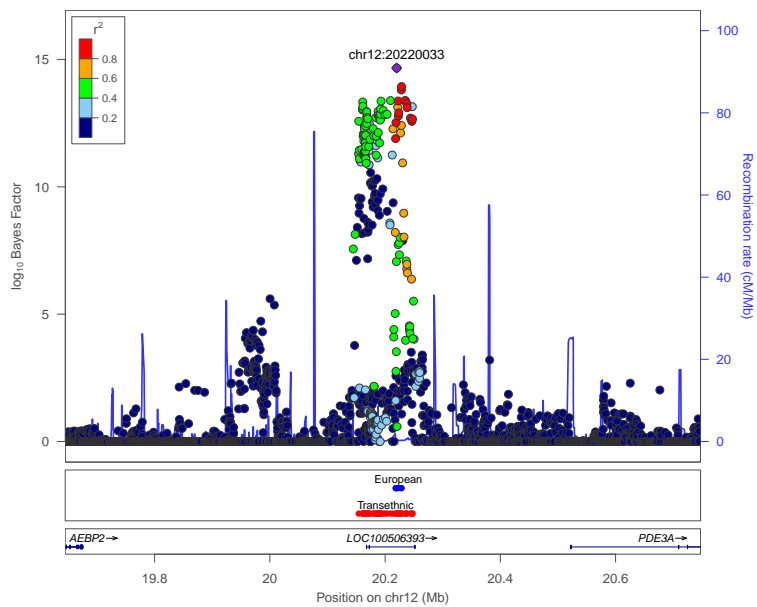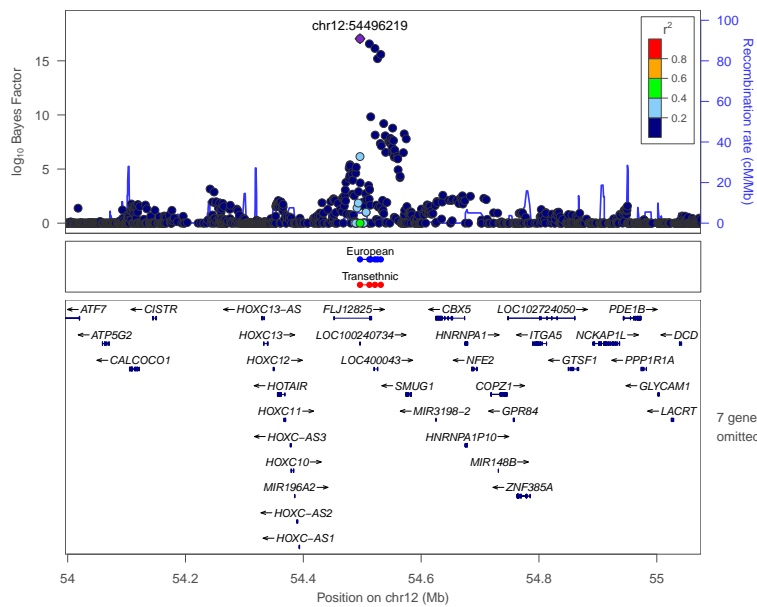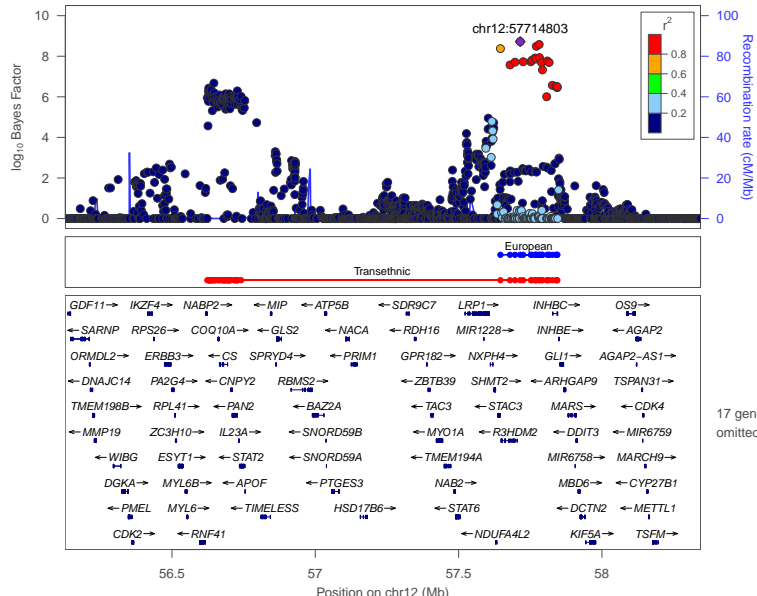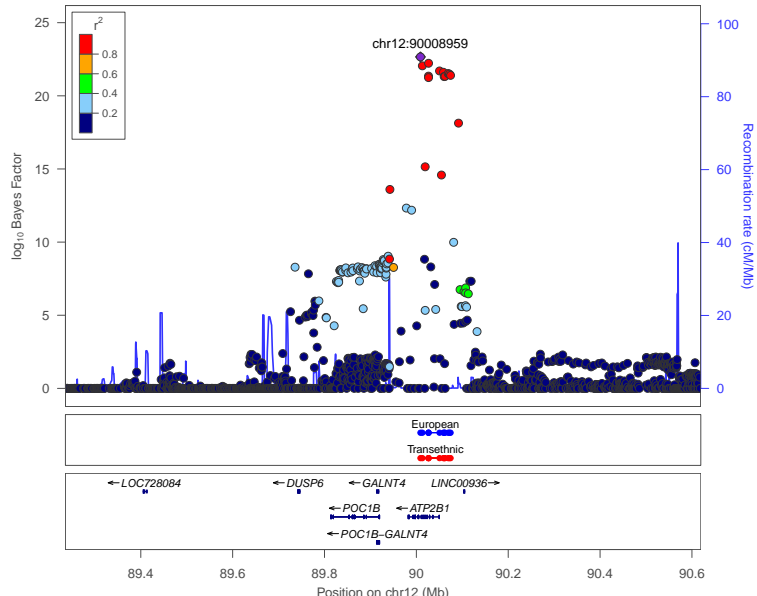

European: 99% credible set derived from European meta analysis  
 Transethnic: 99% credible set derived from transethnic meta analysis

# 4. Previously reported 133 loci in Meta analysis

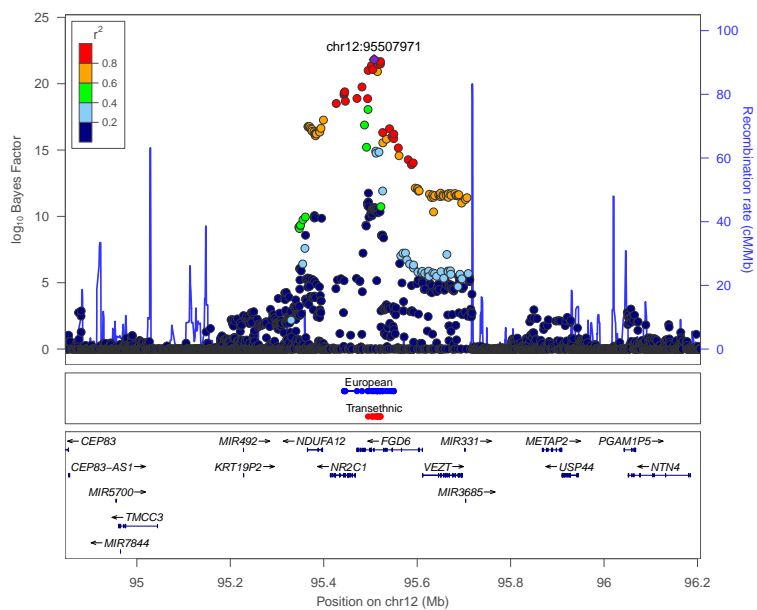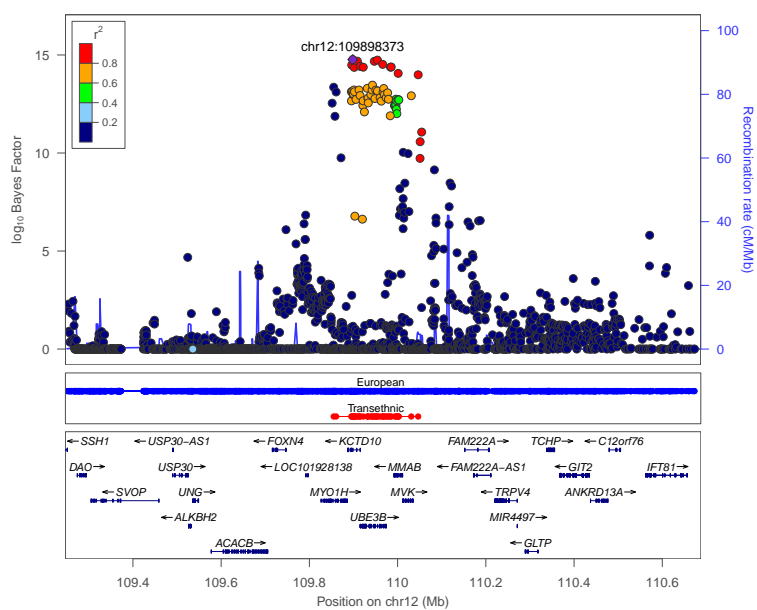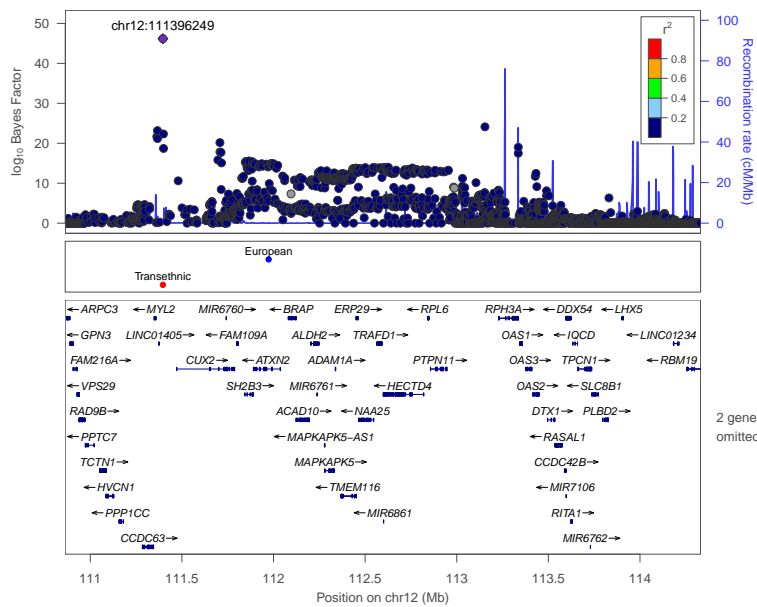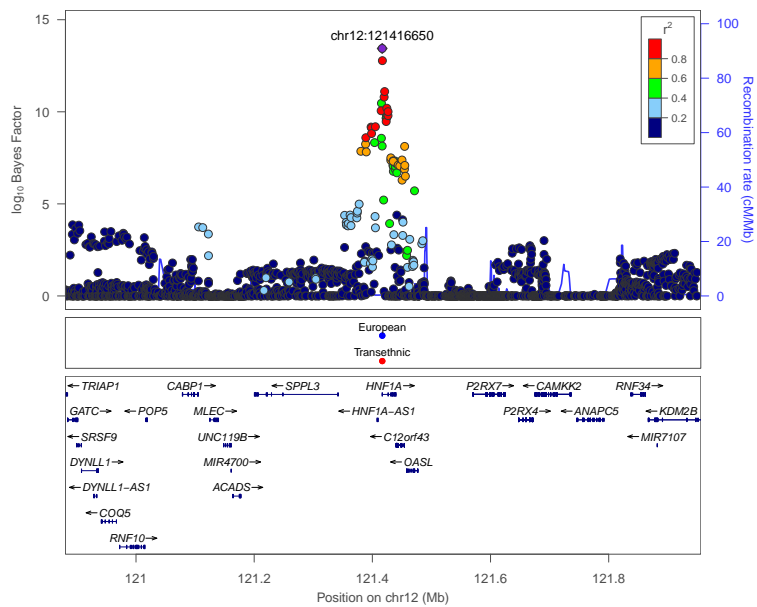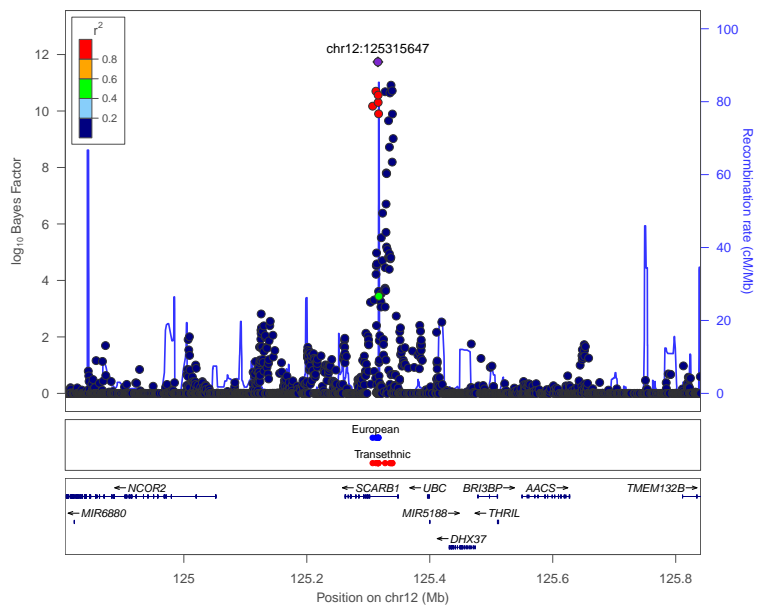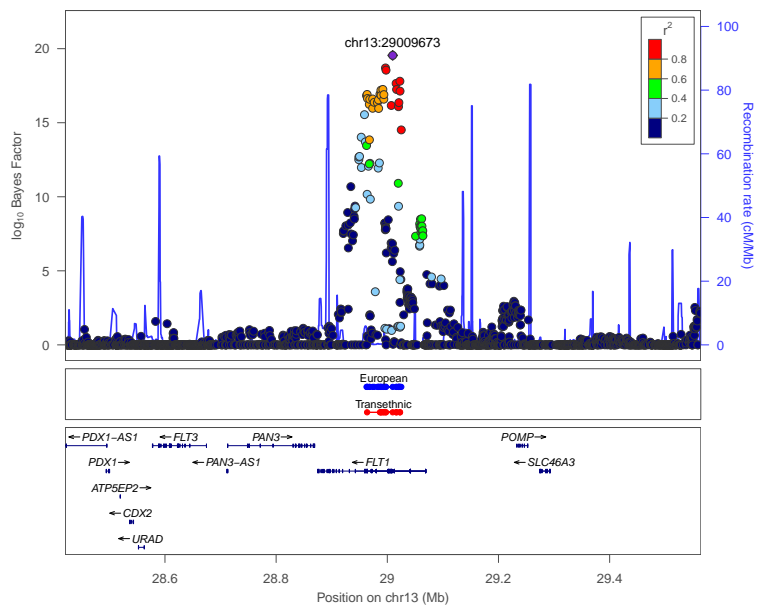

European: 99% credible set derived from European meta analysis  
 Transethnic: 99% credible set derived from transethnic meta analysis

# 4. Previously reported 133 loci in Meta analysis

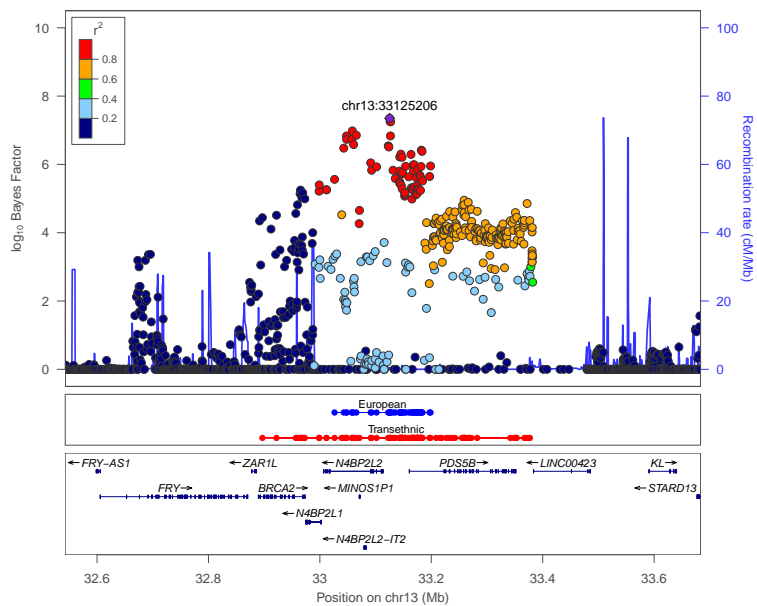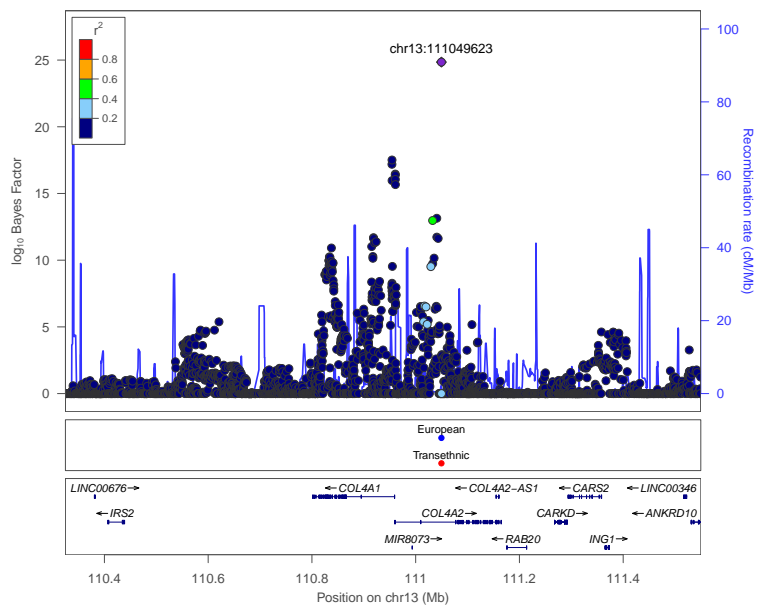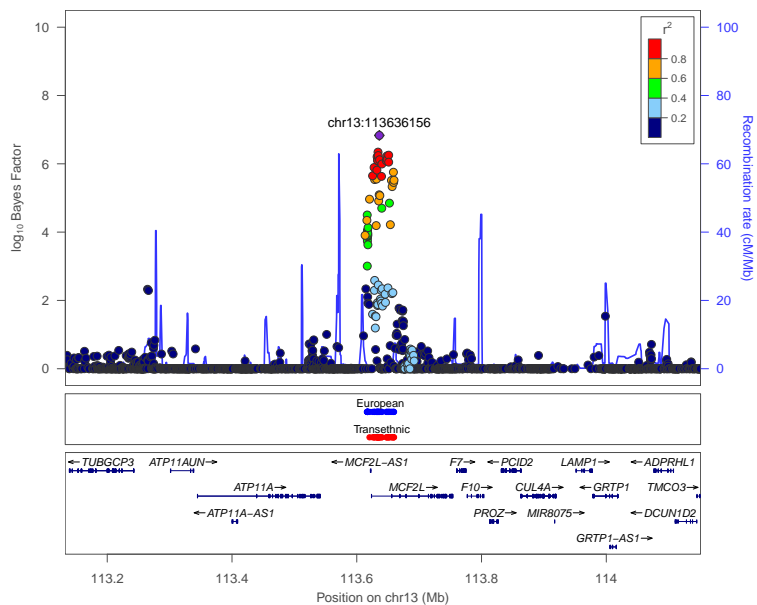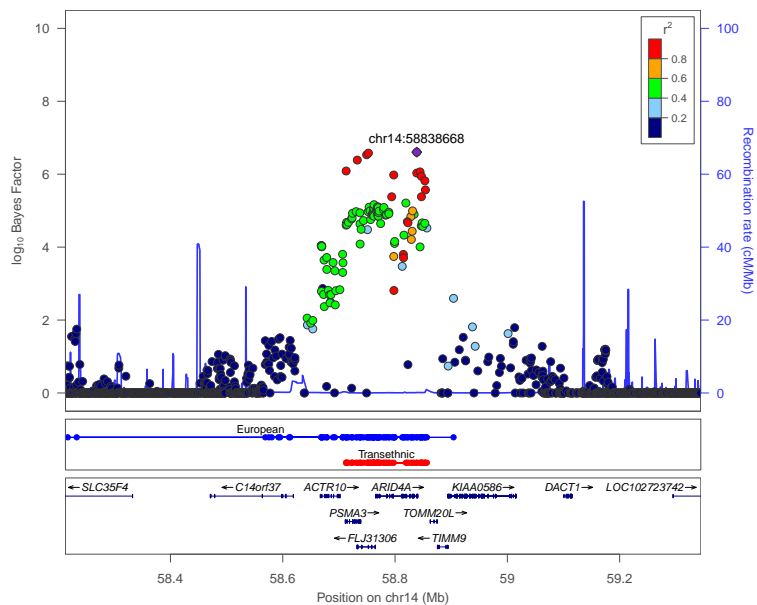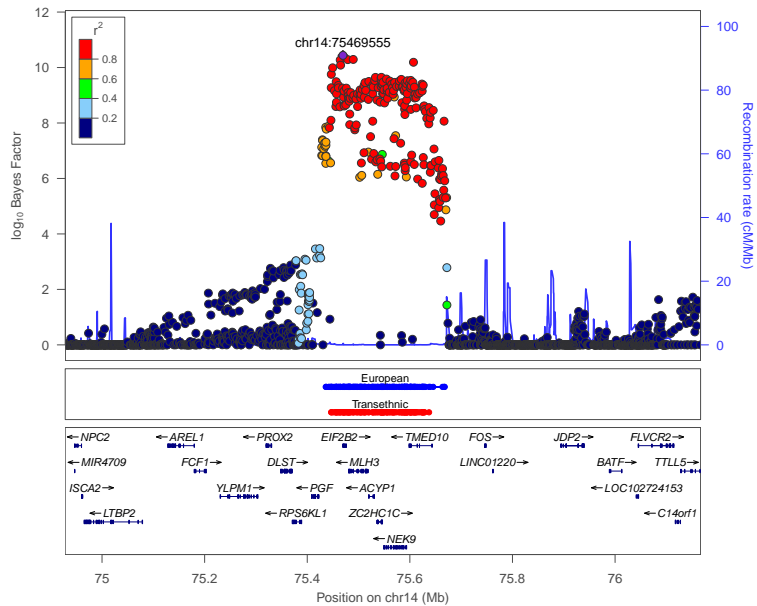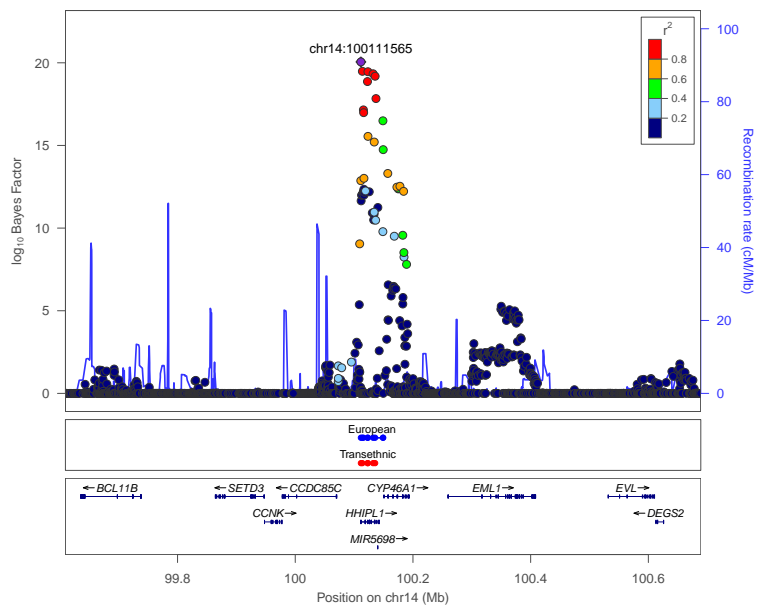

European: 99% credible set derived from European meta analysis  
 Transethnic: 99% credible set derived from transethnic meta analysis

# 4. Previously reported 133 loci in Meta analysis

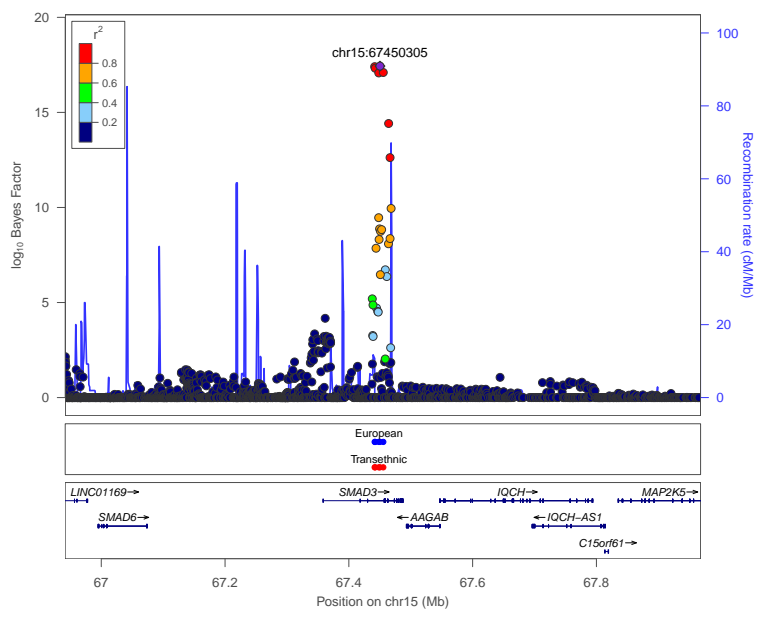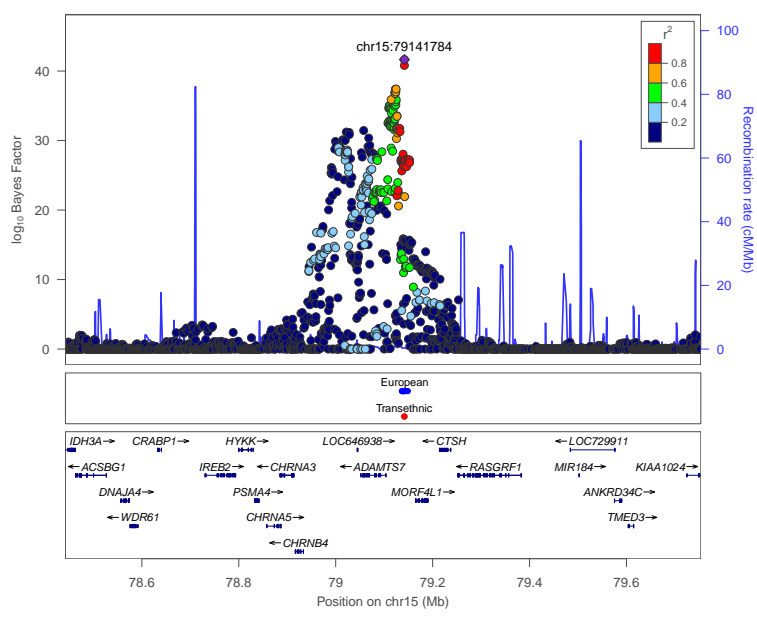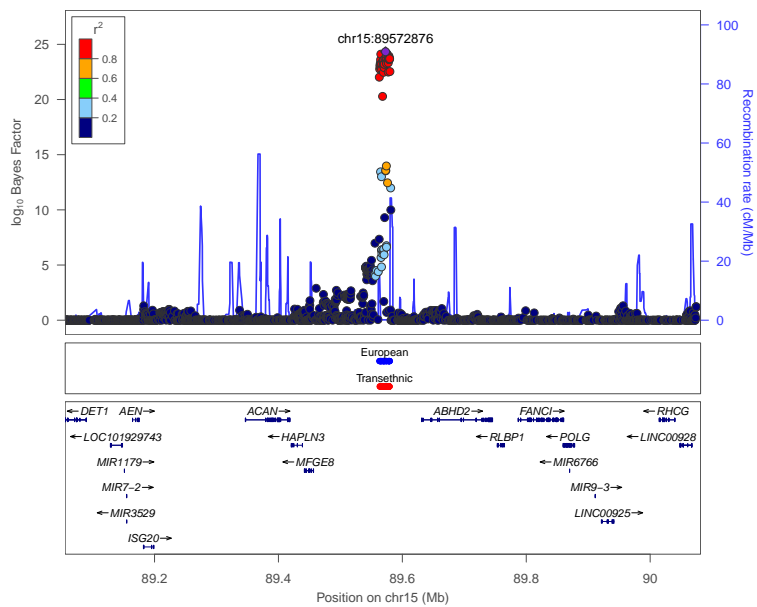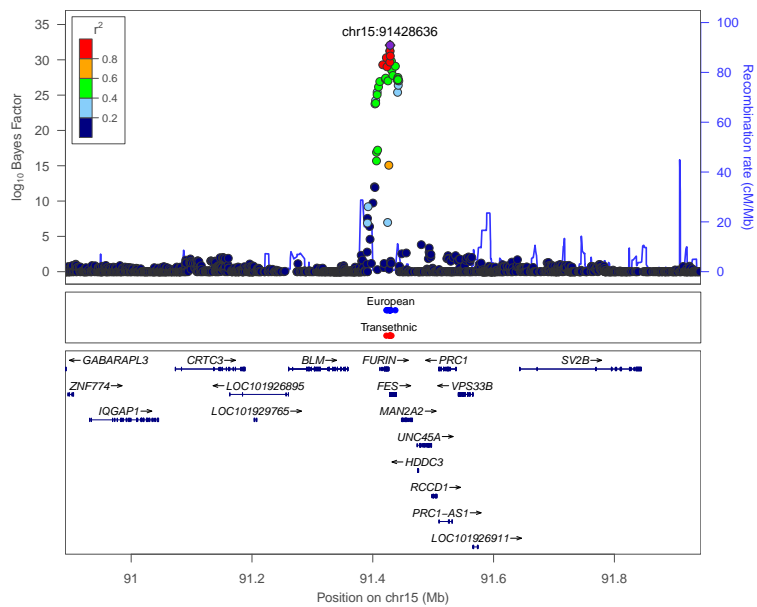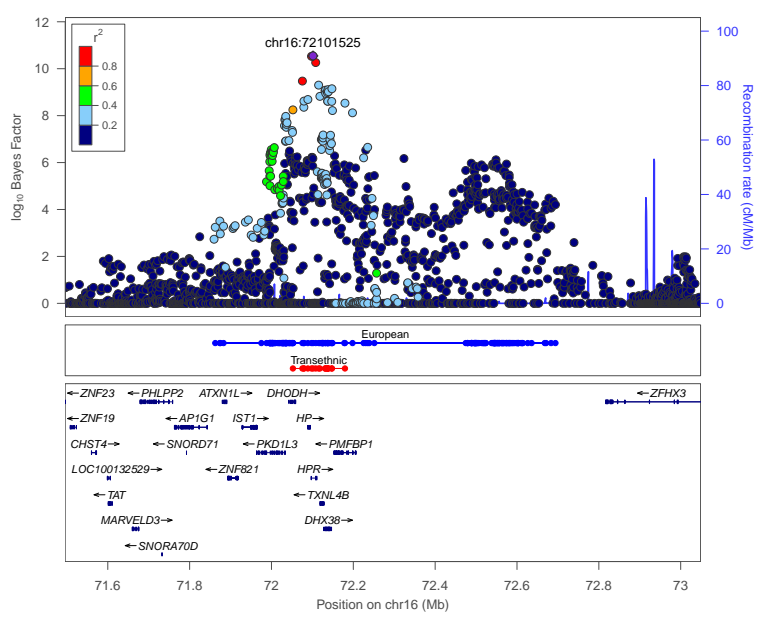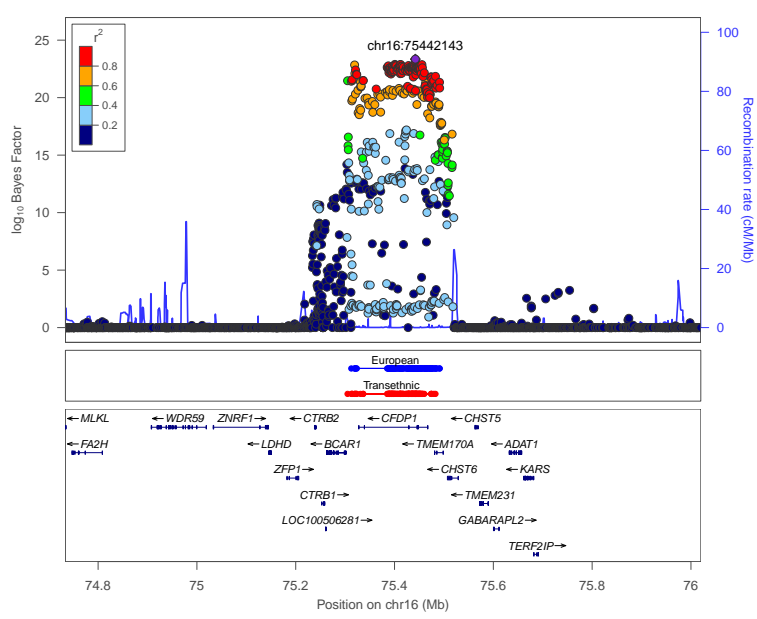

European: 99% credible set derived from European meta analysis  
 Transethnic: 99% credible set derived from transethnic meta analysis

# 4. Previously reported 133 loci in Meta analysis

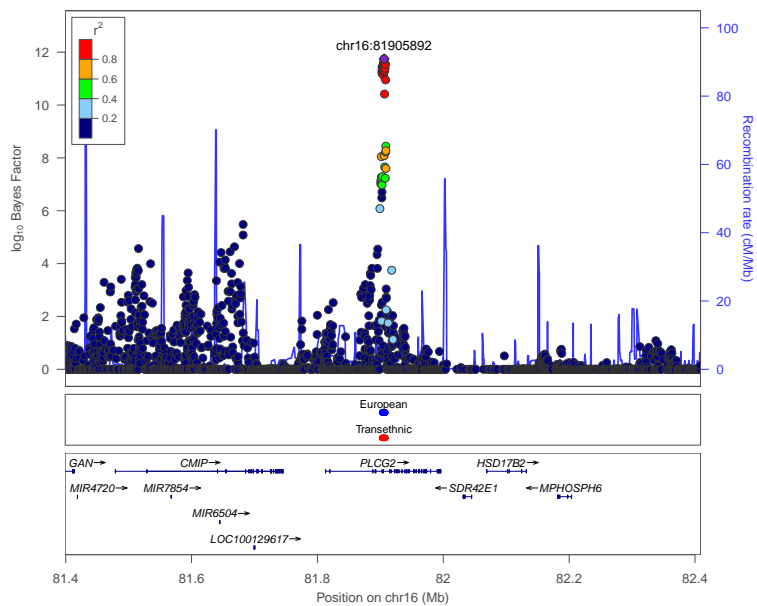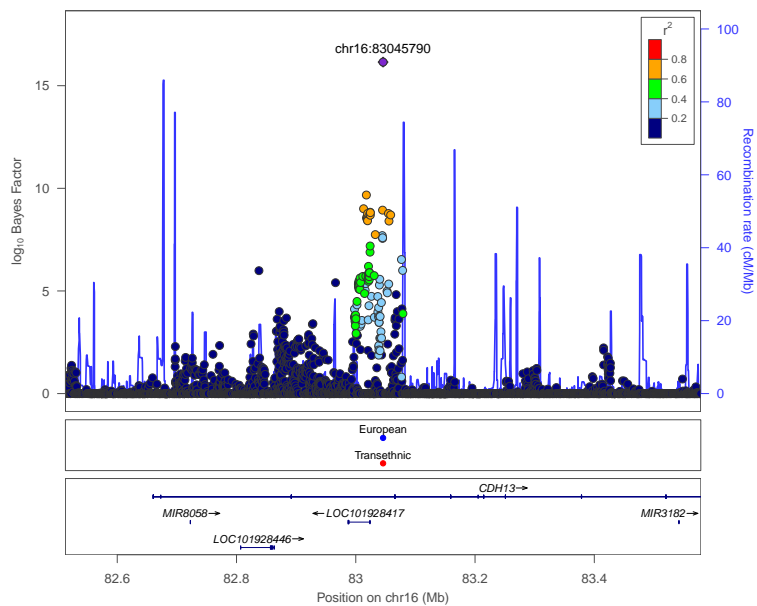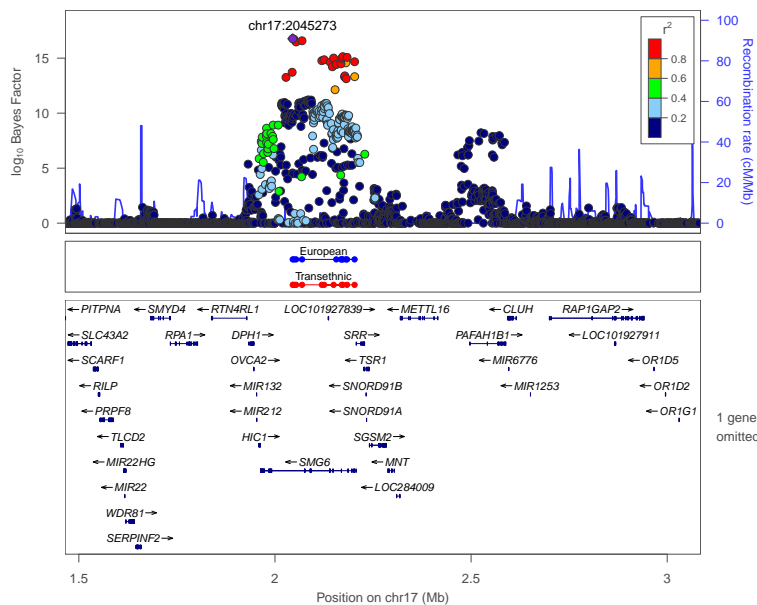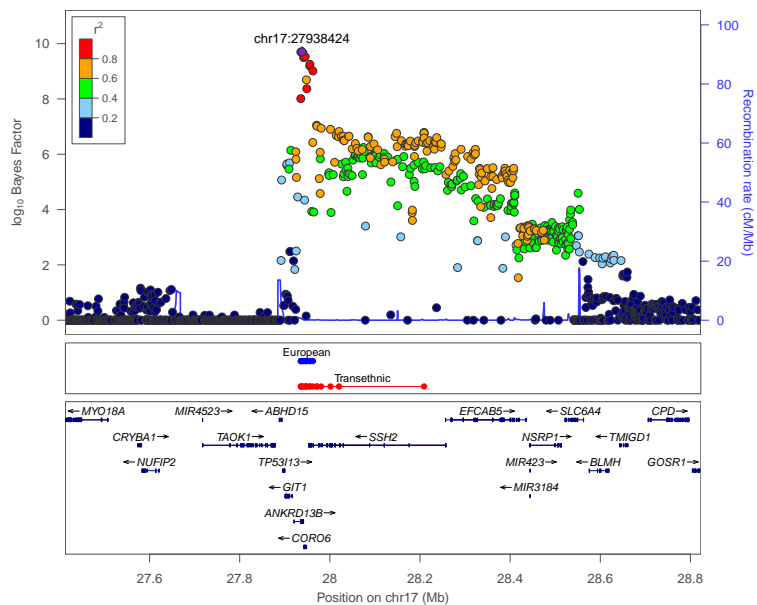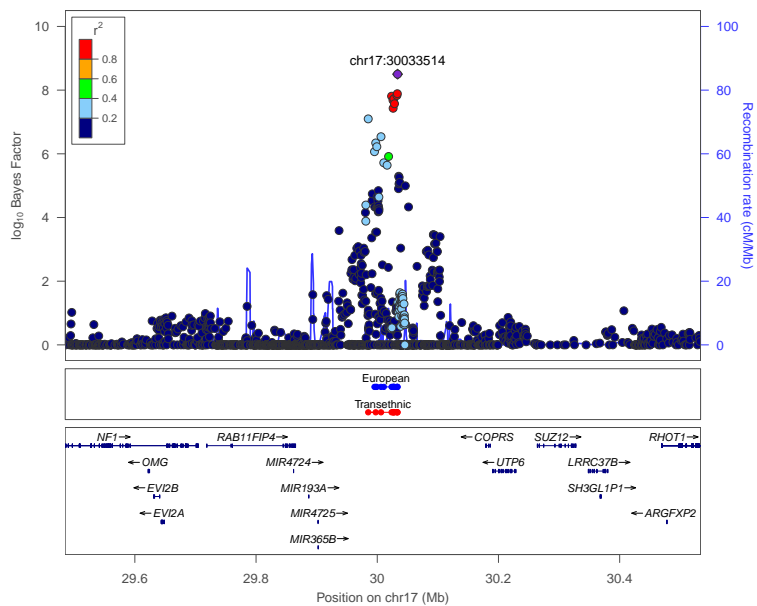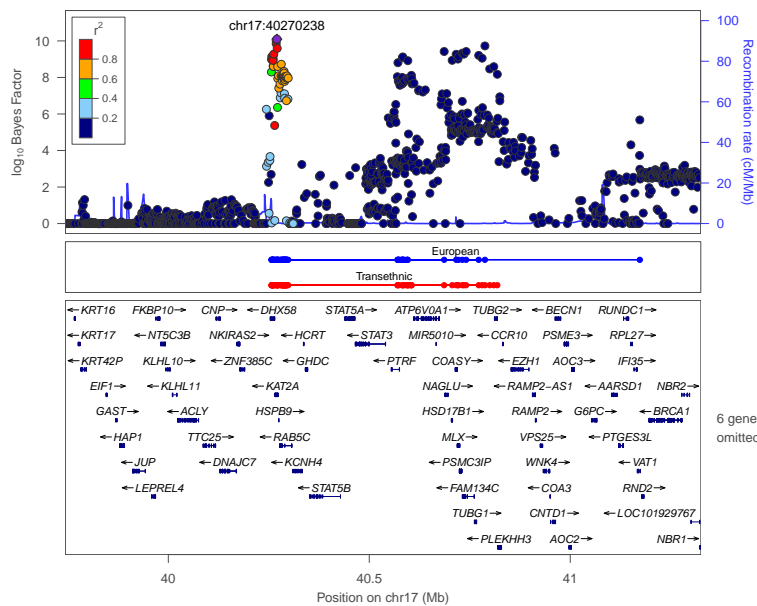

European: 99% credible set derived from European meta analysis  
 Transethnic: 99% credible set derived from transethnic meta analysis



# 4. Previously reported 133 loci in Meta analysis

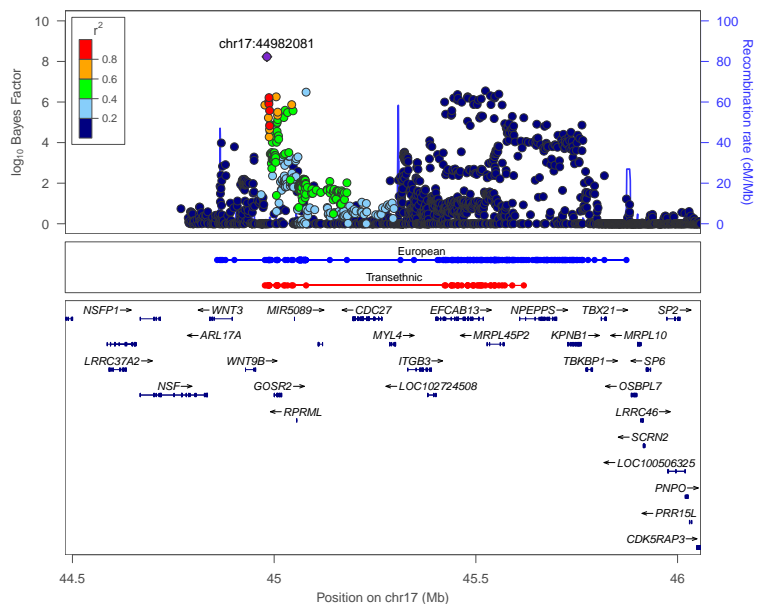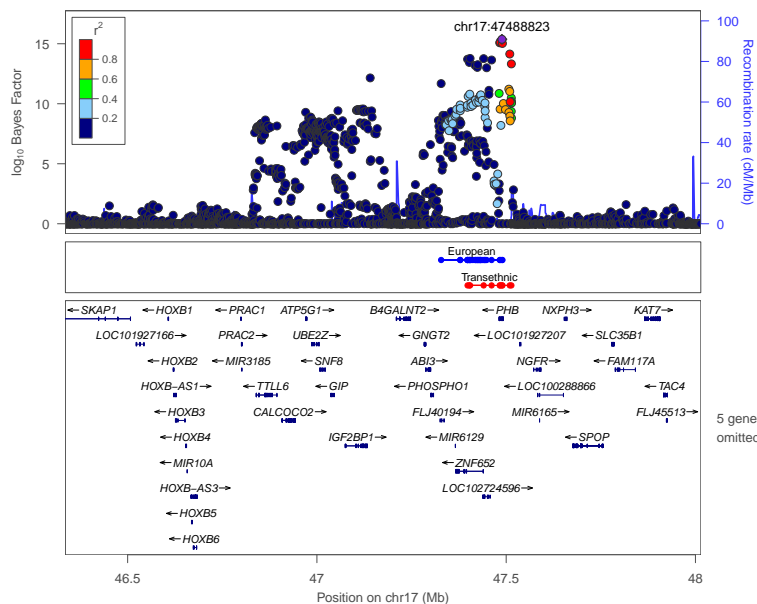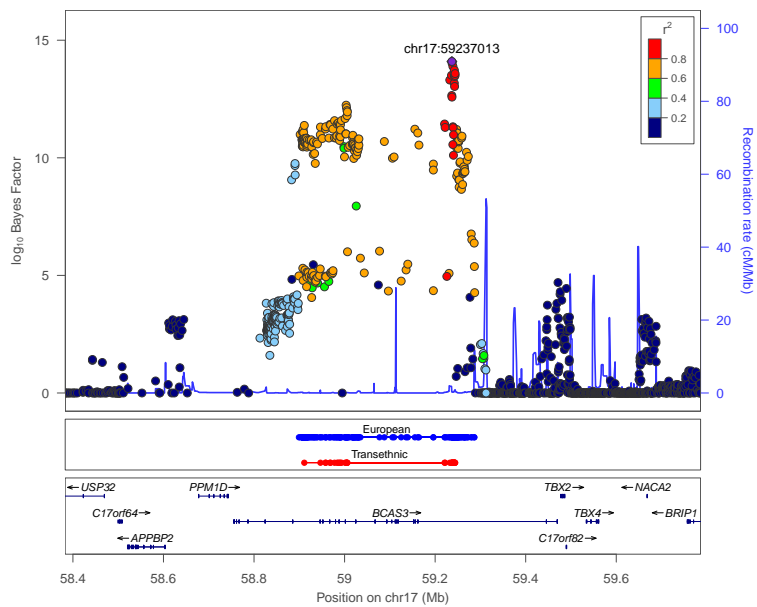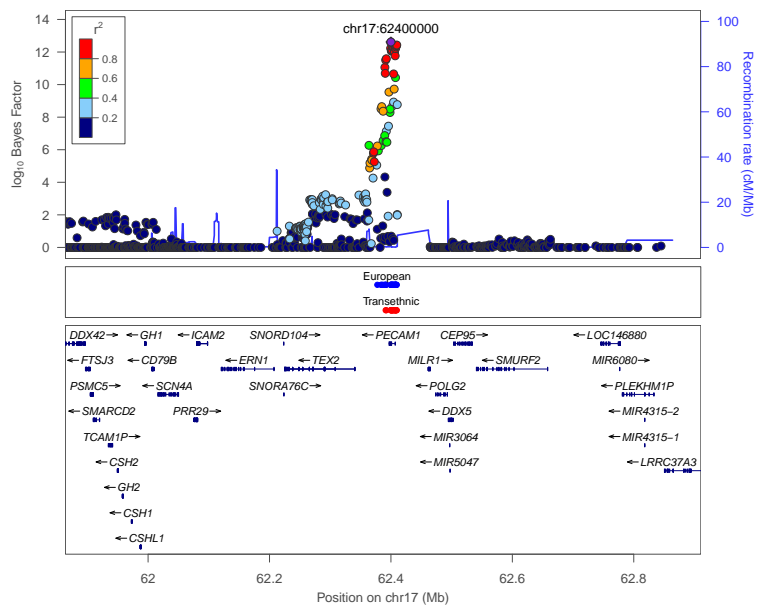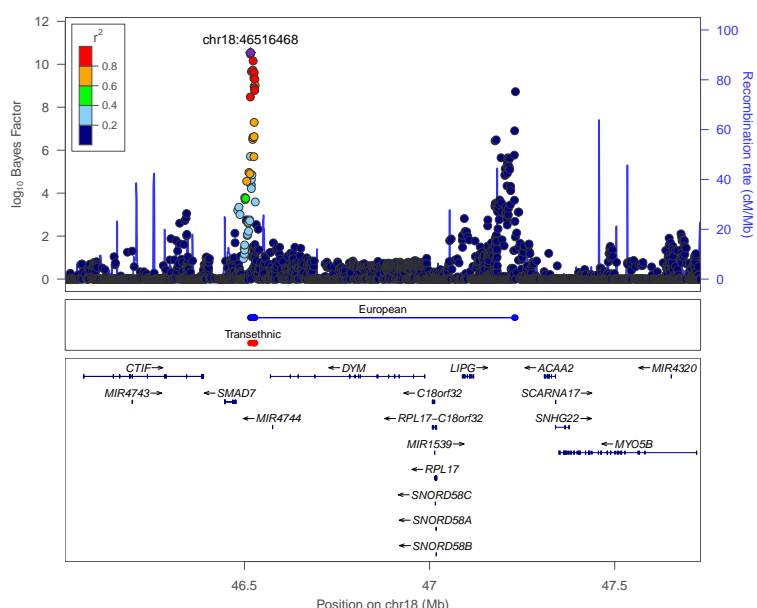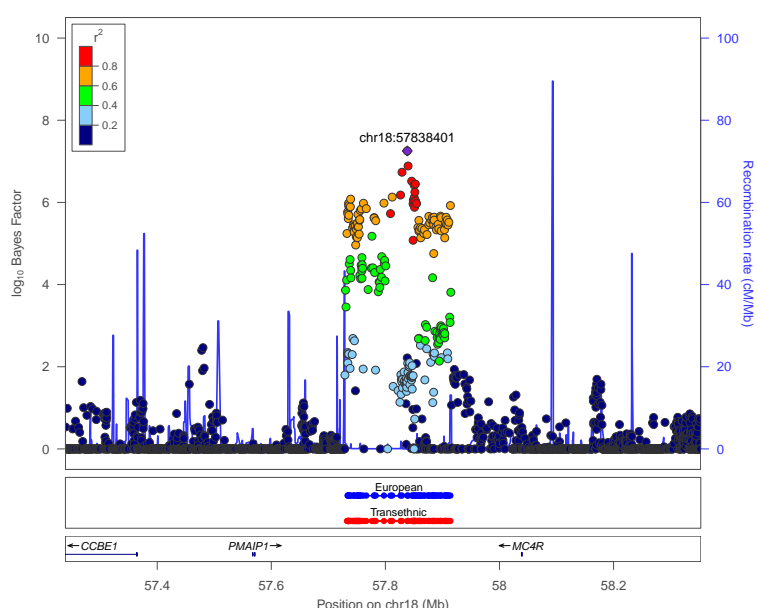

European: 99% credible set derived from European meta analysis  
 Transethnic: 99% credible set derived from transthetic meta analysis



# 4. Previously reported 133 loci in Meta analysis

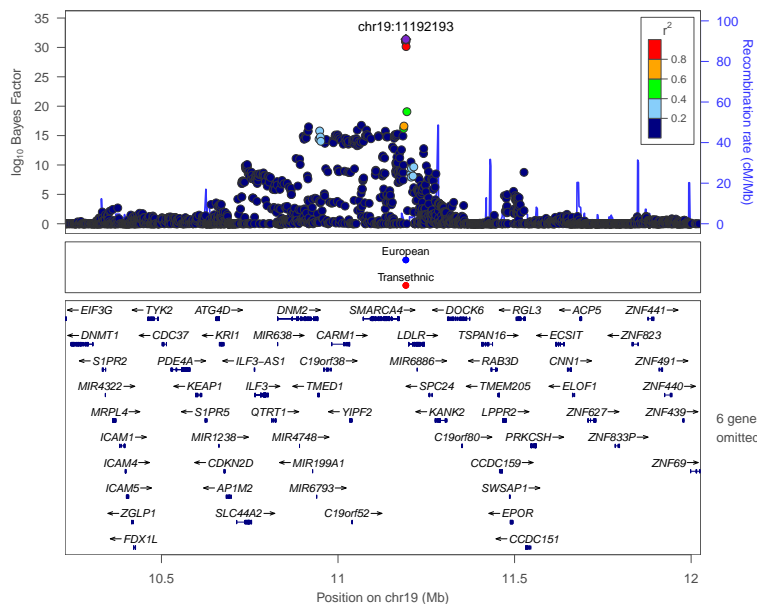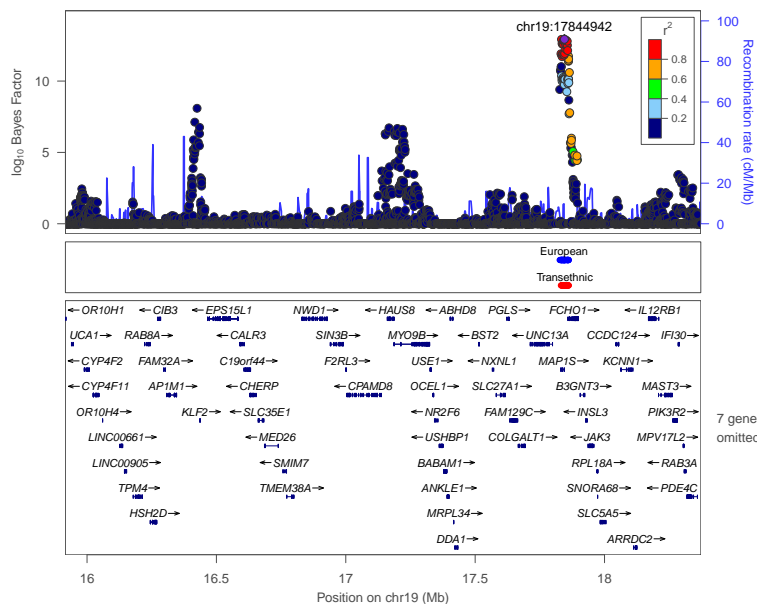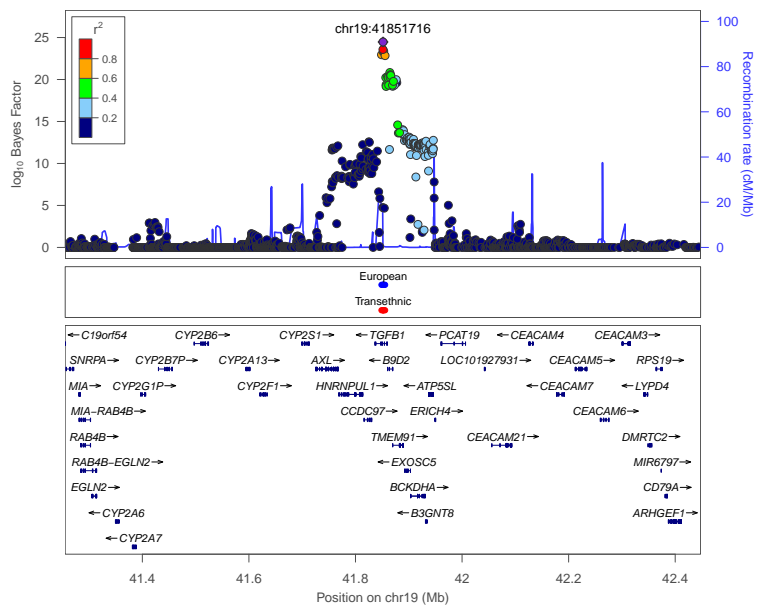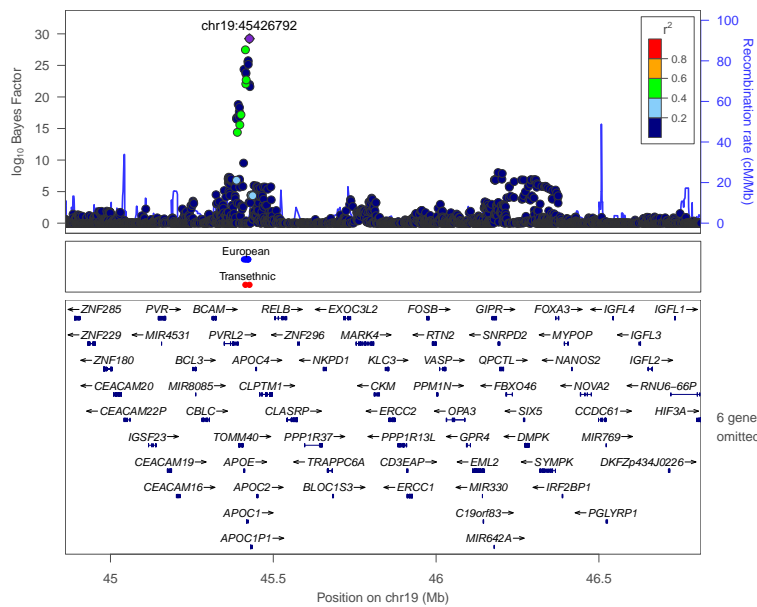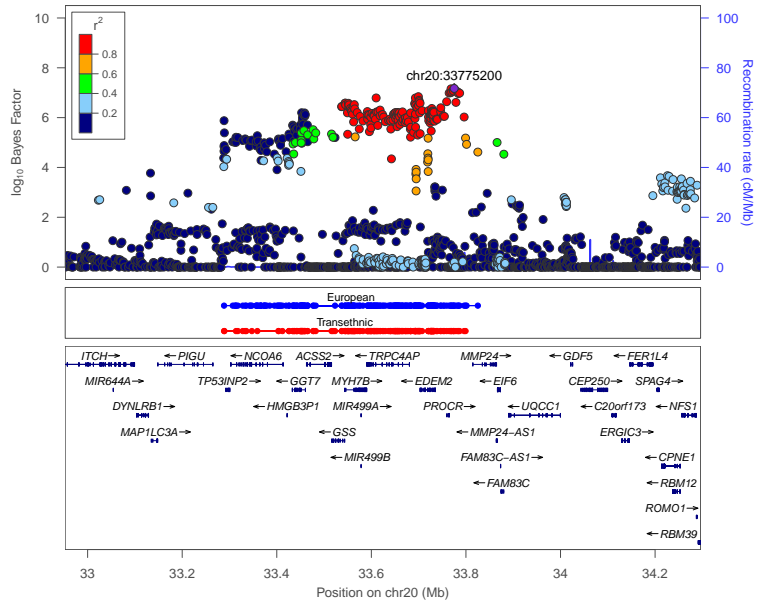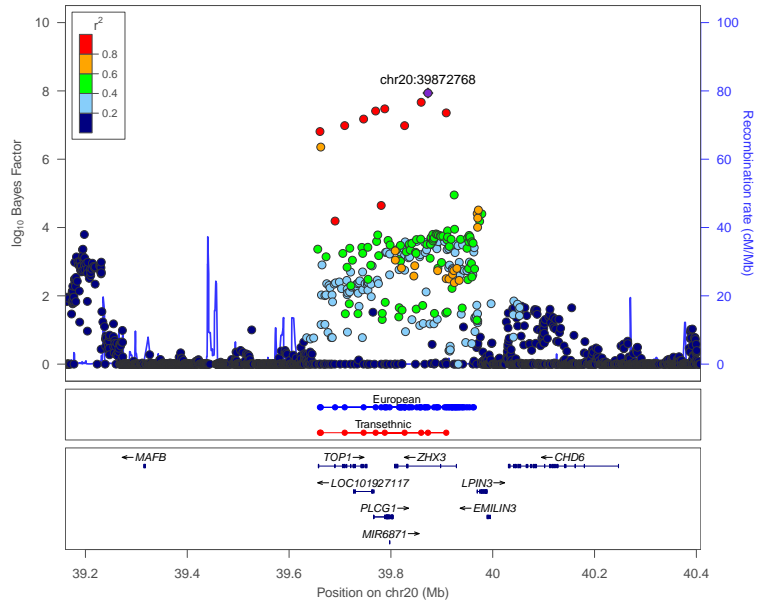

European: 99% credible set derived from European meta analysis  
 Transethnic: 99% credible set derived from transethnic meta analysis

# 4. Previously reported 133 loci in Meta analysis

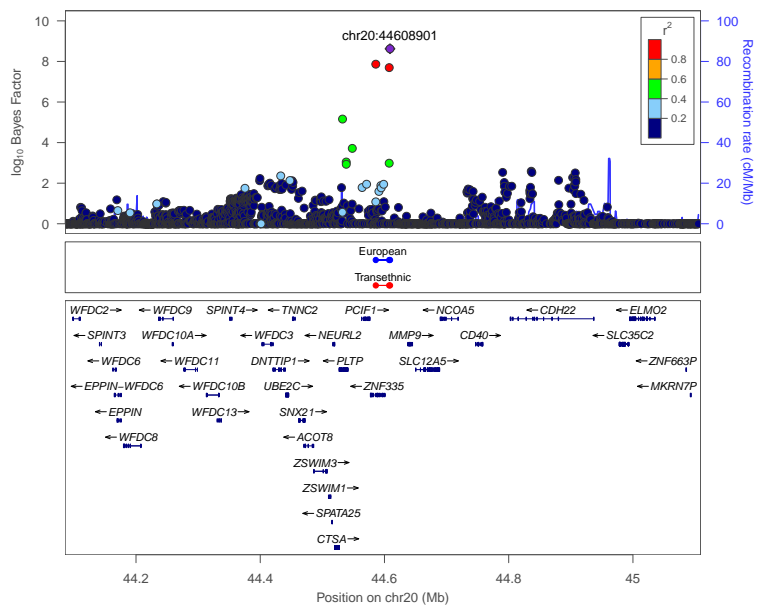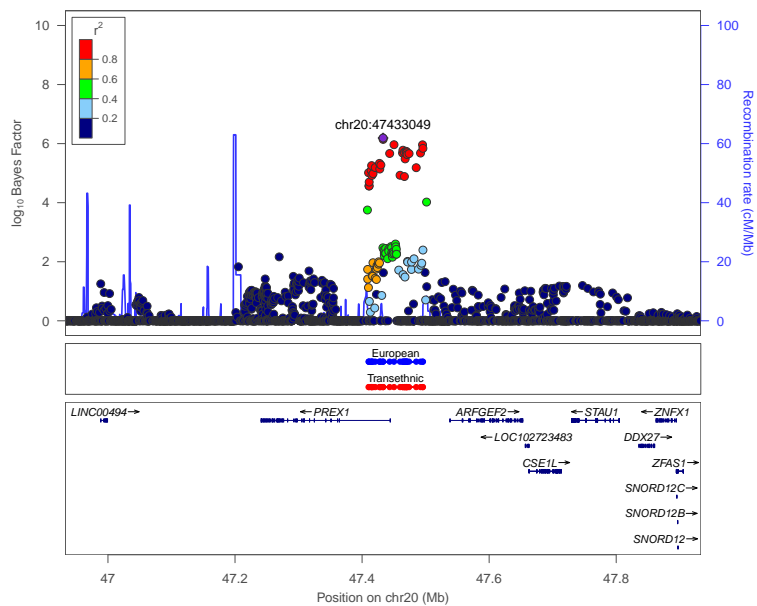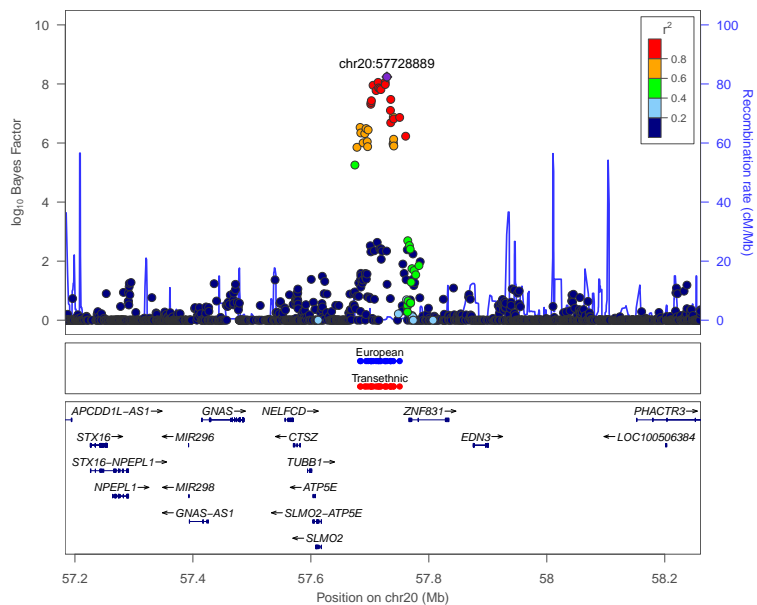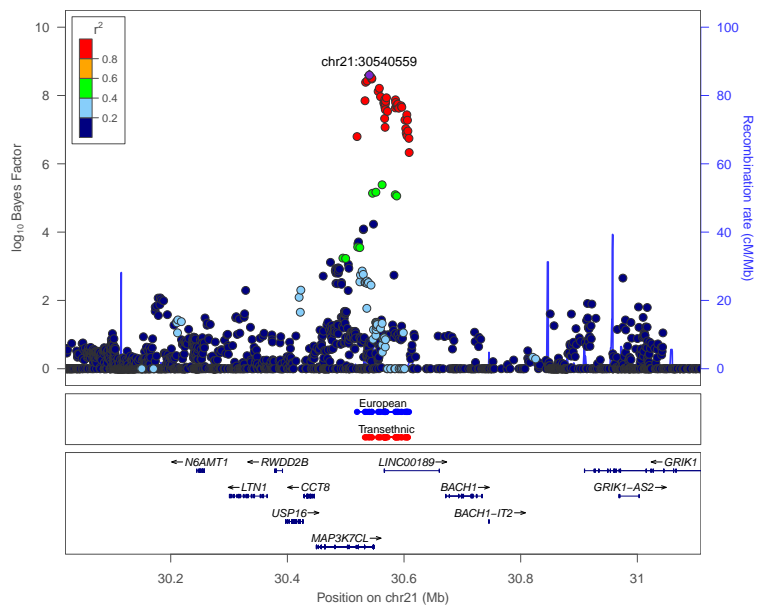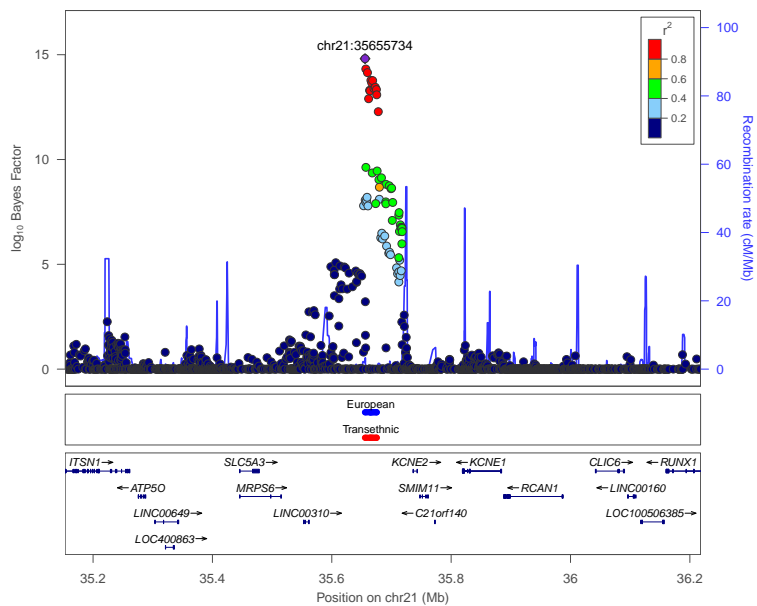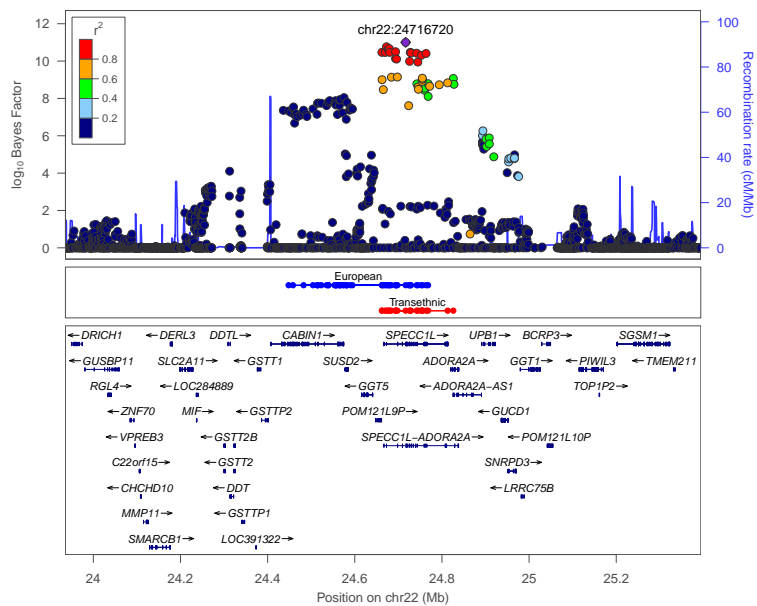

European: 99% credible set derived from European meta analysis  
 Transethnic: 99% credible set derived from transethnic meta analysis

## 4. Previously reported 133 loci in Meta analysis

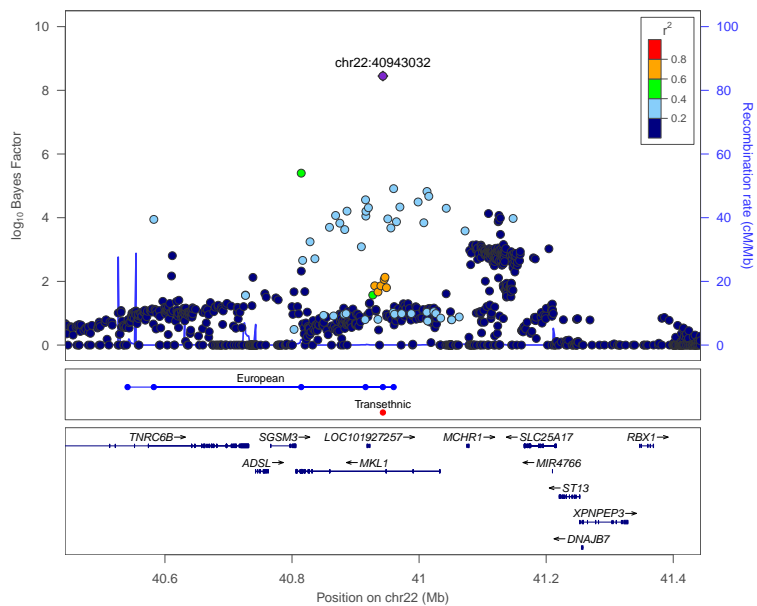

**European:** 99% credible set derived from European meta analysis  
**Transethnic:** 99% credible set derived from transethnic meta analysis
